# Supplementary material for: Multi-target weapons: diaryl-pyrazoline thiazolidinediones simultaneously targeting VEGFR-2 and HDAC cancer hallmarks
Source: Royal Society of Chemistry journal article supplement (doi:10.1039/d1md00125f), 2021-01-01

## Supplementary Information

### **Multi-target weapons: diaryl-pyrazoline thiazolidinediones simultaneously targeting VEGFR-2 and HDAC cancer hallmarks**

Neha Upadhyay<sup>a</sup>, Kalpana Tilekar<sup>a</sup>, Sabreena Safuan<sup>b</sup>, Alan P. Kumar<sup>c</sup>, Markus Schweipert<sup>d</sup>, Franz-Josef Meyer-Almes<sup>\*d</sup>, Ramaa C S<sup>\*a</sup>

<sup>1</sup>Department of Pharmaceutical Chemistry, Bharati Vidyapeeth's College of Pharmacy, Navi Mumbai, India.

<sup>2</sup>Universiti Sains Malaysia School of Health Sciences, Health Campus Universiti Sains Malaysia 16150 Kubang Kerian Kelantan.

<sup>3</sup>National University of Singapore Centre for Translational Medicine (CeTM), 14 Medical Drive, #11-01M, Singapore 117599.

<sup>4</sup>Department of Chemical Engineering and Biotechnology, University of Applied Science, Darmstadt, Germany.

\*Correspondence. E-mail: [sinharamaa@yahoo.in](mailto:sinharamaa@yahoo.in), [franz-josef.meyer-almes@h-da.de](mailto:franz-josef.meyer-almes@h-da.de)

# Table of Contents

| Sr. No. | Content                          | Supplementary Figure/Table Number                                                                                                                                                                                                                                              |
|---------|----------------------------------|--------------------------------------------------------------------------------------------------------------------------------------------------------------------------------------------------------------------------------------------------------------------------------|
| 1       | In-vitro HUVEC assay             | Figure S1. Graphical representation of % inhibition of HUVECs proliferation against different concentration of compounds 13b, 14c, 14d and 14j.                                                                                                                                |
|         |                                  | Table S1. HUVECs IC <sub>50</sub> evaluation table.                                                                                                                                                                                                                            |
| 2       | VEGFR-2 Inhibition Assay         | Figure S2. % Inhibition of VEGFR-2 at 10 μM concentration of compounds 13b, 14c, 14d, and 14j.                                                                                                                                                                                 |
| 3       | HUVEC Tube Formation Assay       | Table S2. Tube formation assay of compound 14c and statistical significance.                                                                                                                                                                                                   |
| 4       | Cellular Migration Assay (HUVEC) | Table S3. Migration assay of compound 14c and statistical significance.                                                                                                                                                                                                        |
| 5       | CAM Assay                        | Table S4. CAM assay of compound 14c and statistical significance.                                                                                                                                                                                                              |
| 6       | MTT Cell Viability Assay         | Table S5. Cell viability of compound 14c.                                                                                                                                                                                                                                      |
| 7       | Molecular Docking                | Table S6: Docking results of indicated TZD-analogs into VEGFR-2 (PDB-ID: 1YWN)                                                                                                                                                                                                 |
|         |                                  | Figure S3: Redocking of ligand from x-ray structure of VEGFR-2 (PDB-ID: 1YWN). Redocked ligand is shown in green and crystallized ligand in magenta.                                                                                                                           |
|         |                                  | Figure S4: Overlay of (S)-14c and (R)-14j having the same absolute configuration at the pyrazole ring docked into the binding channel of VEGFR-2.                                                                                                                              |
|         |                                  | Table S7: Docking results of different TZD-analogs into the active site pocket of HDAC4 (PDB-ID: 4CBY) using Amber 14 force field.                                                                                                                                             |
|         |                                  | Figure S5: Redocking of ligand “Cpd31” into the crystal structure of the binding pocket of the catalytic domain of HDAC4 (PDB-ID: 4CBY) shows perfect overlap between the docked ligand and the x-ray binding pose. Green: ligand of crystal structure, Grey: redocked ligand. |
| 8       | Spectral data                    | All compounds (13a-15g)                                                                                                                                                                                                                                                        |
| 9       | Structural characterization data | All compounds (13a-15g)                                                                                                                                                                                                                                                        |

## 1. In-vitro HUVEC assay

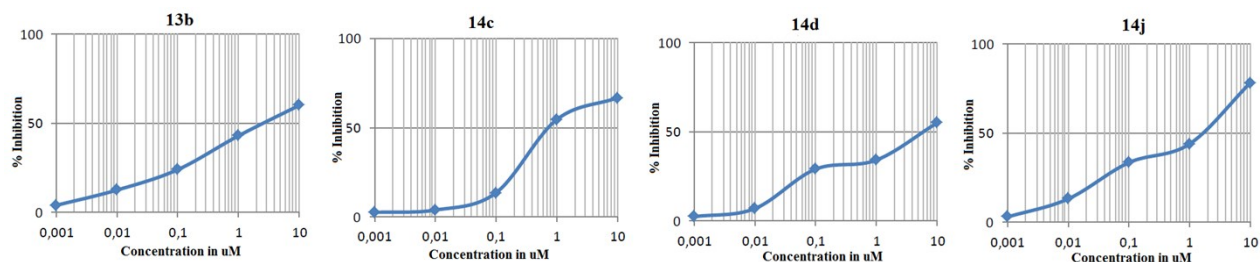

Figure S1. Graphical representation of % inhibition of HUVECs proliferation against different concentration of compounds 13b, 14c, 14d and 14j.

Table S1. HUVECs IC<sub>50</sub> evaluation table.

| Code                   | Concentrations  |                 |                  |                  |                  | IC <sub>50</sub> (μM) |
|------------------------|-----------------|-----------------|------------------|------------------|------------------|-----------------------|
|                        | 10 <sup>1</sup> | 10 <sup>0</sup> | 10 <sup>-1</sup> | 10 <sup>-2</sup> | 10 <sup>-3</sup> |                       |
| <b>13b</b>             | 59.66           | 42.59           | 23.65            | 12.25            | 3.69             | 2                     |
| <b>13d</b>             | 41.25           | 35.29           | 23.62            | 14.75            | 2.69             | >10                   |
| <b>13j</b>             | 32.15           | 25.68           | 15.22            | 3.65             | 1.28             | >10                   |
| <b>14a</b>             | 48.95           | 43.3            | 31.7             | 10.23            | 1.85             | >10                   |
| <b>14c</b>             | 66.59           | 54.28           | 13.26            | 3.65             | 2.36             | 0.7                   |
| <b>14d</b>             | 54.6            | 33.84           | 28.74            | 6.65             | 2.15             | 6                     |
| <b>14e</b>             | 41.25           | 32.69           | 12.58            | 3.36             | 3.58             | >10                   |
| <b>14j</b>             | 77.84           | 43.62           | 33.18            | 12.84            | 2.71             | 2                     |
| <b>15g</b>             | 36.56           | 12.58           | 13.85            | 1.41             | 2.36             | >10                   |
| <b>STS<sup>a</sup></b> | -               | -               | -                | -                | -                | 0.5                   |

<sup>a</sup>STS represents Staurosporine.

## 2. VEGFR-2 Inhibition Assay

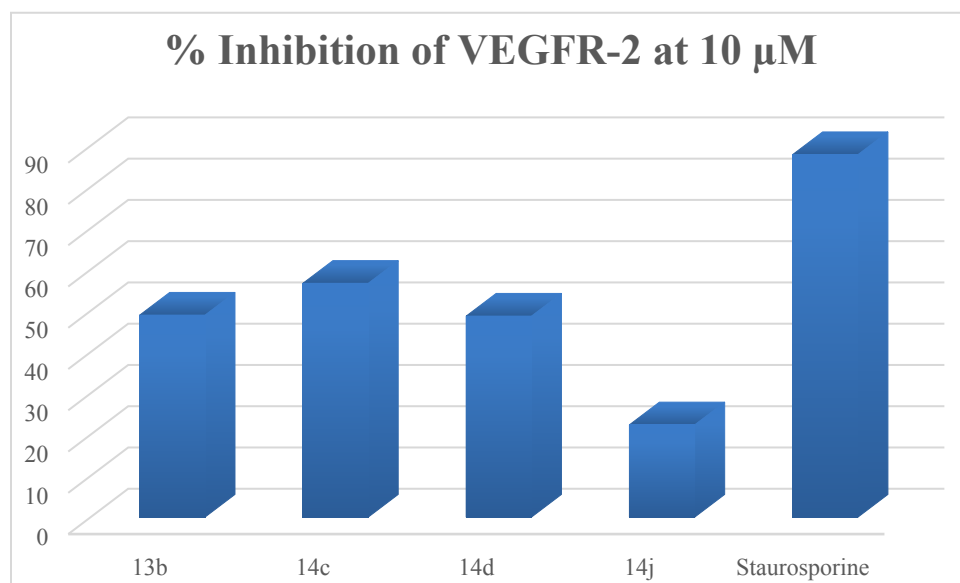

Figure S2. % Inhibition of VEGFR-2 at 10 μM concentration of compounds 13b, 14c, 14d, and 14j.

### 3. HUVEC Tube Formation Assay

Table S2. Tube formation assay of compound 14c and statistical significance.

| Tube formation assay |         |         |         |      |           | p-value<br>(student's unpaired t-test) |
|----------------------|---------|---------|---------|------|-----------|----------------------------------------|
| Intersection counts  | Field 1 | Field 2 | Field 3 | Avg  | Std. Dev. |                                        |
| Untreated            | 26      | 28      | 32      | 28.7 | 3.1       | -                                      |
| Staurosporine        | 6       | 8       | 11      | 8.3  | 2.5       | <0.0001                                |
| 14c                  | 25      | 28      | 26      | 26.3 | 1.5       | 0.3                                    |

### 4. Cellular Migration Assay (HUVEC)

Table S3. Migration assay of compound 14c and statistical significance.

| Migration Assay |         |         |         |      |           | p-value<br>(student's unpaired t-test) |
|-----------------|---------|---------|---------|------|-----------|----------------------------------------|
| % Wound Healing |         |         |         |      |           |                                        |
|                 | Field 1 | Field 2 | Field 3 | Avg  | Std. Dev. |                                        |
| Untreated       | 84.32   | 88.19   | 79.25   | 83.9 | 3.7       | -                                      |
| Staurosporine   | 32.19   | 18.65   | 16.47   | 22.4 | 7.0       | <0.0001                                |
| 14c             | 77.85   | 71.28   | 68.22   | 72.5 | 4.0       | <0.01                                  |

### 5. CAM Assay

Table S4. CAM assay of compound 14c and statistical significance.

| Group | Conc. ( $\mu$ g) | Score |   |   |   | Avg. | Std. dev. | p-value<br>(student's unpaired t-test) |
|-------|------------------|-------|---|---|---|------|-----------|----------------------------------------|
| UT    | 8                | 7     | 8 | 6 | 8 | 7.3  | 1.0       | -                                      |
| 14c   | 1                | 2     | 0 | 1 | 2 | 1.3  | 1.0       | <0.0001                                |

### 6. MTT Cell Viability Assay

Table S5. Cell viability of compound 14c.

| Mean Cell Viability         |       |       |       |       |  |
|-----------------------------|-------|-------|-------|-------|--|
| Concentration<br>$\mu$ M/mL | MCF-7 | K562  | A549  | HT-29 |  |
| 100                         | 28.33 | 25.00 | 25.53 | 22.99 |  |
| 75                          | 32.48 | 27.35 | 27.63 | 23.99 |  |
| 50                          | 44.30 | 48.90 | 30.00 | 27.44 |  |
| 25                          | 49.84 | 71.87 | 42.63 | 34.05 |  |
| 10                          | 74.46 | 94.36 | 67.37 | 64.08 |  |
| 2.5                         | 86.59 | 95.53 | 79.34 | 96.98 |  |
| Negative control            | 100   |       |       |       |  |

### 7. Molecular Docking

#### 7.1 VEGFR-2 (PDB ID: 1YWN)

Table S6: Docking results of indicated TZD-analogs into VEGFR-2 (PDB-ID: 1YWN)

| Cpd             | GBVI/WSA dG score |
|-----------------|-------------------|
| (S)-14c         | -9.3              |
| (R)-14c         | -10.6             |
| (S)-14j         | -10.2             |
| (R)-14j         | -10.8             |
| Redocked ligand | -11.2             |

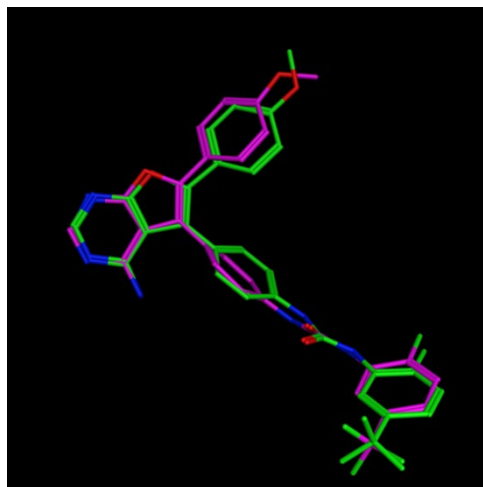

Figure S3: Redocking of ligand from x-ray structure of VEGFR-2 (PDB-ID: 1YWN). Redocked ligand is shown in green and crystallized ligand in magenta.

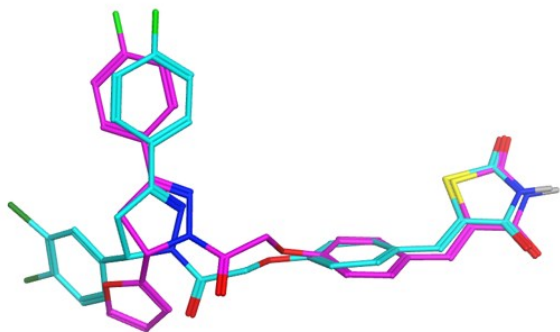

Figure S4: Overlay of (S)-14c and (R)-14j having the same absolute configuration at the pyrazole ring docked into the binding channel of VEGFR-2.

## 7.2 HDAC4 (PDB ID: 4CBY)

Table S7: Docking results of different TZD-analogs into the active site pocket of HDAC4 (PDB-ID: 4CBY) using Amber 14 force field.

| Cpd                 | GBVI/WSA dG score |
|---------------------|-------------------|
| (S)-14c             | -9.3              |
| (R)-14c             | -8.7              |
| (S)-14j             | -11.7             |
| (R)-14j             | -9.2              |
| Cpd 31 <sup>2</sup> | -13.6             |

<sup>2</sup> Burli, R. W., 2013 Journal of Medicinal Chemistry 56(24): 9934-9954.

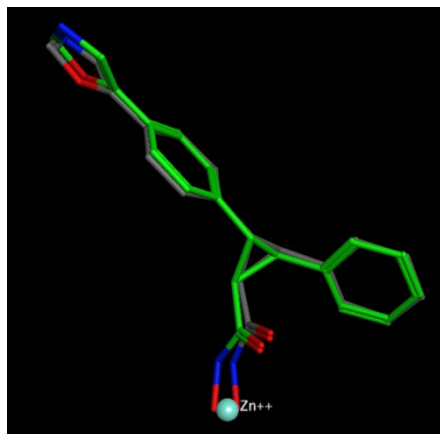

Figure S5: Redocking of ligand “Cpd31” into the crystal structure of the binding pocket of the catalytic domain of HDAC4 (PDB-ID: 4CBY) shows perfect overlap between the docked ligand and the x-ray binding pose. Green: ligand of crystal structure, Grey: redocked ligand.

## 8. Spectral data –

All the structural characterization data has been presented here in detail

5-(4-(2-(3,5-diphenyl-4,5-dihydro-1H-pyrazol-1-yl)-2-oxoethoxy)benzylidene)thiazolidine-2,4-dione

**(13a)**. Pale yellow colour. Yield 0.48 g (54%). M.P. 254.6 °C. FTIR ( $\text{cm}^{-1}$ ) 3375, 1735, 1678, 1587, 1504, 1442, 1263, 839.  $^1\text{H-NMR}$  (400 MHz,  $\text{DMSO-d}_6$ )  $\delta$  ppm 3.18 (dd,  $J = 4.8, 18.2$  Hz, 1H, pyrazoline  $\text{CH}_2$ ), 3.85-3.93 (m, 1H, pyrazoline  $\text{CH}_2$ ), 5.25 (d,  $J = 16.2$  Hz, 1H,  $\text{CH}_2$ ), 5.39 (d,  $J = 16.2$  Hz, 1H,  $\text{CH}_2$ ), 5.59 (dd,  $J = 4.8, 11.6$  Hz, 1H, pyrazoline CH), 7.04 (d,  $J = 8.8$  Hz, 2H, aromatic), 7.24-7.27 (m, 3H, aromatic), 7.32-7.36 (m, 2H, aromatic), 7.47–7.53 (m, 5H, aromatic), 7.74 (s, 1H, benzylidene), 7.83–7.86 (m, 2H, aromatic), 12.53 (bs, 1H, NH proton).  $^{13}\text{C-NMR}$  (100 MHz,  $\text{DMSO-d}_6$ )  $\delta$  41.04, 59.44, 65.57, 115.47, 115.48, 115.74, 115.96, 120.41, 125.73, 127.77, 127.87, 129.31, 129.39, 131.74, 131.75, 137.84, 154.64, 159.78, 162.17, 162.56, 164.49, 167.74, 167.94. Theoretical mass: 483.54, LC-MS ( $m/z$ , I%): 482.1 [(M-H)<sup>+</sup>, 100%]. HPLC Purity: % Area 96.36, Retention Time 4.89 mins.

5-(4-(2-(5-(2-chlorophenyl)-3-phenyl-4,5-dihydro-1H-pyrazol-1-yl)-2-oxoethoxy)benzylidene)

thiazolidine-2,4-dione **(13b)**. Cream colour. Yield 0.6 g (56%). M.P. 258.0 °C. FTIR ( $\text{cm}^{-1}$ ) 3365, 1734, 1678, 1589, 1568, 1508, 1273, 825, 748.  $^1\text{H-NMR}$  (400 MHz,  $\text{DMSO-d}_6$ )  $\delta$  ppm 3.14 (dd,  $J = 4.8, 18.0$  Hz, 1H, pyrazoline  $\text{CH}_2$ ), 3.95-4.03 (m, 1H, pyrazoline  $\text{CH}_2$ ), 5.27 (d,  $J = 16.4$  Hz, 1H,  $\text{CH}_2$ ), 5.46 (d,  $J = 16.4$  Hz, 1H,  $\text{CH}_2$ ), 5.80 (dd,  $J = 4.8, 11.6$  Hz, 1H, pyrazoline CH), 7.11 (d,  $J = 8.4$  Hz, 2H, aromatic), 7.23-7.24 (m, 1H, aromatic), 7.31-7.33 (m, 2H, aromatic), 7.48-7.49 (m, 4H, aromatic), 7.53 (d,  $J = 8.4$  Hz, 2H, aromatic), 7.74 (s, 1H, benzylidene), 7.84 (d,  $J = 6.4$  Hz, 2H, aromatic), 12.52 (bs, 1H, NH proton).  $^{13}\text{C-NMR}$  (100 MHz,  $\text{DMSO-d}_6$ )  $\delta$  40.64, 57.71, 65.48, 115.48, 120.41, 125.76, 126.69, 126.93, 127.66, 128.77, 129.15, 129.67, 130.55, 130.70, 130.79, 131.76, 131.87, 138.35, 155.66, 159.80, 164.59,

167.32, 167.88. Theoretical mass: 517.98, LC-MS (m/z, I%): 516.1 [(M-H)<sup>+</sup>, 100%]. HPLC Purity: % Area 95.49, Retention Time 5.45 mins.

5-(4-(2-oxo-2-(3-phenyl-5-(4-(trifluoromethyl)phenyl)-4,5-dihydro-1H-pyrazol-1-yl)ethoxy)benzylidene)thiazolidine-2,4-dione (**13d**). Cream colour. Yield 0.55 g (52%). M.P. 265.4 °C. FTIR (cm<sup>-1</sup>) 3354, 1734, 1676, 1585, 1533, 1508, 1263, 1180, 798. <sup>1</sup>H-NMR (400 MHz, DMSO-d<sub>6</sub>) δ ppm 3.23-3.28 (m, 1H, pyrazoline CH<sub>2</sub>), 3.90-3.98 (m, 1H, pyrazoline CH<sub>2</sub>), 5.27 (d, J= 16.0 Hz, 1H, CH<sub>2</sub>), 5.41 (d, J= 16.0 Hz, 1H, CH<sub>2</sub>), 5.70 (dd, J= 4.0, 11.6 Hz, 1H, pyrazoline CH), 7.08 (d, J= 8.4 Hz, 2H, aromatic), 7.51-7.54 (m, 7H, aromatic), 7.70-7.74 (m, 3H, benzylidene and aromatic), 7.85-7.86 (m, 2H, aromatic), 12.51 (bs, 1H, NH proton). <sup>13</sup>C-NMR (100 MHz, DMSO-d<sub>6</sub>) δ 41.52, 59.58, 65.49, 115.43, 120.45, 125.60, 125.64, 125.77, 126.55, 126.96, 128.77, 130.54, 130.72, 131.71, 131.86, 146.22, 155.61, 159.75, 164.66, 167.35, 167.89. Theoretical mass: 551.54, LC-MS (m/z, I%): 549.9 [(M-H)<sup>+</sup>, 100%]. HPLC Purity: % Area 97.37, Retention Time 5.93 mins.

5-(4-(2-(5-(4-fluorophenyl)-3-phenyl-4,5-dihydro-1H-pyrazol-1-yl)-2-oxoethoxy)benzylidene)thiazolidine-2,4-dione (**13e**). Pale yellow colour. Yield 0.6 g (58%). M.P. 258.4 °C. FTIR (cm<sup>-1</sup>) 3400, 1734, 1678, 1585, 1506, 1456, 1263, 1143, 1176, 817. <sup>1</sup>H-NMR (400 MHz, DMSO-d<sub>6</sub>) δ ppm 3.20 (dd, J= 3.8, 18.4 Hz, 1H, pyrazoline CH<sub>2</sub>), 3.86-3.93 (m, 1H, pyrazoline CH<sub>2</sub>), 5.24 (d, J= 16.4 Hz, 1H, CH<sub>2</sub>), 5.37 (d, J= 16.0 Hz, 1H, CH<sub>2</sub>), 5.60 (dd, J= 4.4, 11.6 Hz, 1H, pyrazoline CH), 7.07 (d, J= 8.4 Hz, 2H, aromatic), 7.16 (t, J= 8.8 Hz, 2H, aromatic), 7.29-7.33 (m, 2H, aromatic), 7.49-7.53 (m, 5H, aromatic), 7.74 (s, 1H, benzylidene), 7.85 (d, J= 4.8 Hz, 2H, aromatic), 12.52 (bs, 1H, NH proton). <sup>13</sup>C-NMR (100 MHz, DMSO-d<sub>6</sub>) δ 41.68, 59.29, 65.52, 115.27, 115.440, 115.49, 120.44, 125.74, 126.92, 127.70, 127.79, 128.77, 130.66, 131.74, 131.86, 137.89, 155.56, 159.79, 160.14, 162.56, 164.50, 167.36, 167.91. Theoretical mass: 501.53, LC-MS (m/z, I%): 500.1 [(M-H)<sup>+</sup>, 100%]. HPLC Purity: % Area 99.44, Retention Time 4.31 mins.

5-(4-(2-(5-(2,4-difluorophenyl)-3-phenyl-4,5-dihydro-1H-pyrazol-1-yl)-2-oxoethoxy)benzylidene)thiazolidine-2,4-dione (**13f**). Pale yellow colour. Yield 0.63 g (62%). M.P. 253.2 °C. FTIR (cm<sup>-1</sup>) 3406, 1734, 1678, 1591, 1508, 1447, 1269, 1151, 1138, 827. <sup>1</sup>H-NMR (400 MHz, DMSO-d<sub>6</sub>) δ ppm 3.27 (dd, J= 5.2, 18.4 Hz, 1H, pyrazoline CH<sub>2</sub>), 3.88-3.96 (m, 1H, pyrazoline CH<sub>2</sub>), 5.24 (d, J= 16.4 Hz, 1H, CH<sub>2</sub>), 5.36 (d, J= 16.4 Hz, 1H, CH<sub>2</sub>), 5.70 (dd, J= 5.2, 12.0 Hz, 1H, pyrazoline CH), 7.06 (d, J= 8.4 Hz, 3H, aromatic), 7.23-7.28 (m, 1H, aromatic), 7.31-7.37 (m, 1H, aromatic), 7.50-7.53 (m, 5H, aromatic), 7.74 (s, 1H, benzylidene), 7.84 (d, J= 4.8 Hz, 2H, aromatic), 12.51 (s, 1H, NH proton). <sup>13</sup>C-NMR (100 MHz, DMSO-d<sub>6</sub>) δ 40.46, 54.47, 65.44, 104.11, 111.49, 115.42, 120.46, 125.76, 126.91, 128.78, 130.57, 130.70, 131.72, 131.85, 155.78, 159.76, 164.55, 167.36, 167.90. Theoretical mass: 519.52, LC-MS (m/z, I%): 518.1 [(M-H)<sup>+</sup>, 100%]. HPLC Purity: % Area 96.28, Retention Time 4.67 mins.

5-(4-(2-oxo-2-(3-phenyl-5-(p-tolyl)-4,5-dihydro-1H-pyrazol-1-yl)ethoxy)benzylidene)thiazolidine-2,4-dione (**13g**). Pale yellow colour. Yield 0.67 g (61%). M.P. 272.3 °C. FTIR (cm<sup>-1</sup>) 3390, 3036, 1732, 1678,

1581, 1504, 1452, 1257, 804. <sup>1</sup>H-NMR (400 MHz, DMSO-d<sub>6</sub>) δ ppm 2.27 (s, 3H, CH<sub>3</sub>), 3.16 (dd, J= 4.8, 18.0 Hz, 1H, pyrazoline CH<sub>2</sub>), 3.85-3.92 (m, 1H, pyrazoline CH<sub>2</sub>), 5.24 (d, J= 16.0 Hz, 1H, CH<sub>2</sub>), 5.37 (d, J= 16.4 Hz, 1H, CH<sub>2</sub>), 5.55 (dd, J= 4.4, 11.6 Hz, 1H, pyrazoline CH), 7.07 (d, J= 8.8 Hz, 2H, aromatic), 7.49-7.53 (m, 5H, aromatic), 7.74 (s, 1H, benzylidene), 7.83-7.86 (m, 6H, aromatic), 12.55 (bs, 1H, NH proton). <sup>13</sup>C-NMR (100 MHz, DMSO-d<sub>6</sub>) δ 20.60, 41.77, 59.73, 65.56, 115.45, 120.42, 125.47, 125.73, 126.88, 128.78, 129.18, 130.61, 130.75, 131.77, 131.86, 136.55, 138.82, 155.56, 159.83, 164.37, 167.34, 167.91. Theoretical mass: 497.56, LC-MS (m/z, I%): 496.0 [(M-H)<sup>+</sup>, 100%]. HPLC Purity: % Area 97.76, Retention Time 5.54 mins.

5-(4-(2-(5-(3,4-dichlorophenyl)-3-phenyl-4,5-dihydro-1H-pyrazol-1-yl)-2-oxoethoxy)benzylidene)thiazolidine-2,4-dione (**13j**). Cream colour. Yield 0.7 g (69%). M.P. 272.7 °C. FTIR (cm<sup>-1</sup>) 3389, 1730, 1681, 1591, 1512, 1469, 1271, 825, 688, 632. <sup>1</sup>H-NMR (400 MHz, DMSO-d<sub>6</sub>) δ ppm 3.17 (dd, J= 5.6, 18.4 Hz, 1H, pyrazoline CH<sub>2</sub>), 3.94-4.01 (m, 1H, pyrazoline CH<sub>2</sub>), 5.26 (d, J= 16.4 Hz, 1H, CH<sub>2</sub>), 5.44 (d, J= 16.4 Hz, 1H, CH<sub>2</sub>), 5.77 (dd, J= 5.6, 12.0 Hz, 1H, pyrazoline CH), 7.10 (d, J= 8.8 Hz, 2H, aromatic), 7.27 (d, J= 8.4 Hz, 1H, aromatic), 7.40 (dd, J= 2.0, 8.4 Hz, 1H, aromatic), 7.48-7.50 (m, 3H, aromatic), 7.54 (d, J= 8.4 Hz, 2H, aromatic), 7.66 (d, J= 1.6 Hz, 1H, aromatic), 7.74 (s, 1H, benzylidene), 7.83 (m, 2H, aromatic), 12.53 (bs, 1H, NH proton). <sup>13</sup>C-NMR (100 MHz, DMSO-d<sub>6</sub>) δ 40.37, 57.34, 65.45, 115.45, 120.47, 125.78, 126.95, 127.78, 28.34, 128.78, 129.09, 130.47, 130.76, 131.75, 131.87, 132.74, 137.51, 155.74, 159.76, 164.67, 167.35, 167.91. Theoretical mass: 552.43, LC-MS (m/z, I%): 550.0 [(M-2H)<sup>+</sup>, 100%]. HPLC Purity: % Area 96.92, Retention Time 6.40 mins.

5-(4-(2-(5-(4-bromophenyl)-3-phenyl-4,5-dihydro-1H-pyrazol-1-yl)-2-oxoethoxy)benzylidene)thiazolidine-2,4-dione (**13k**). Cream colour. Yield 0.68 g (59%). M.P. 273.0 °C. FTIR (cm<sup>-1</sup>) 3406, 1732, 1680, 1591, 1568, 1508, 1273, 825, 601. <sup>1</sup>H NMR (400 MHz, DMSO-d<sub>6</sub>) δ ppm 3.20 (dd, J= 4.4, 18.4 Hz, 1H, pyrazoline CH<sub>2</sub>), 3.86-3.94 (m, 1H, pyrazoline CH<sub>2</sub>), 5.24 (d, J= 16.0 Hz, 1H, CH<sub>2</sub>), 5.38 (d, J= 16.0 Hz, 1H, CH<sub>2</sub>), 5.58 (dd, J= 4.4, 11.6 Hz, 1H, pyrazoline CH), 7.07 (d, J= 8.4 Hz, 2H, aromatic), 7.23 (d, J= 8.0 Hz, 2H, aromatic), 7.49-7.50 (m, 2H, aromatic), 7.51-7.52 (m, 2H, aromatic), 7.53-7.54 (m, 3H, aromatic), 7.74 (s, 1H, benzylidene), 7.83-7.85 (d, J= 5.2 Hz, 2H, aromatic), 12.50 (bs, 1H, NH proton). <sup>13</sup>C-NMR (100 MHz, DMSO-d<sub>6</sub>) δ 41.53, 59.41, 65.49, 115.43, 120.40, 120.47, 125.75, 126.93, 127.97, 128.78, 130.60, 130.69, 131.53, 131.73, 131.87, 141.08, 155.58, 159.77, 164.53, 167.38, 167.92. Theoretical mass: 562.43, LC-MS (m/z, I %): 561.0 [(M-H)<sup>+</sup>, 100%]. HPLC Purity: % Area 98.65, Retention Time 5.83 mins.

5-(4-(2-(3-(4-fluorophenyl)-5-phenyl-4,5-dihydro-1H-pyrazol-1-yl)-2-oxoethoxy)benzylidene)thiazolidine-2,4-dione (**14a**). Off white colour. Yield 0.74 g (55%). M.P. 248.0 °C. FTIR (cm<sup>-1</sup>) 3365, 1732, 1676, 1647, 1585, 1506, 1456, 1425, 1263, 1143, 833. <sup>1</sup>H-NMR (400 MHz, DMSO-d<sub>6</sub>) δ ppm 3.20 (d, J= 15.48 Hz, 1H, pyrazoline CH<sub>2</sub>), 3.88 (s, 1H, pyrazoline CH<sub>2</sub>), 5.23-5.40 (m, 2H, CH<sub>2</sub>), 5.59 (s, 1H,



pyrazoline CH), 7.07 (s, 2H, aromatic), 7.26-7.34 (m, 7H, aromatic), 7.51 (s, 2H, aromatic), 7.31 (s, 1H, benzylidene), 7.91 (s, 2H, aromatic), 12.57 (bs, 1H, NH proton). <sup>13</sup>C-NMR (100 MHz, DMSO-d<sub>6</sub>) δ 40.46, 54.52, 65.37, 104.05, 115.34, 115.71, 115.92, 120.45, 125.27, 127.27, 129.23, 129.31, 131.62, 131.78, 154.81, 159.68, 162.21, 164.49, 167.14, 167.81. Theoretical mass: 501.53, LC-MS (m/z, I%): 500.1 [(M-H)<sup>+</sup>, 100%]. HPLC Purity: % Area 95.03, Retention Time 4.66 mins.

5-(4-(2-(5-(2-chlorophenyl)-3-(4-fluorophenyl)-4,5-dihydro-1H-pyrazol-1-yl)-2-oxoethoxy)benzylidene)thiazolidine-2,4-dione (**14b**). Off white colour. Yield 0.71 g (58%). M.P. 269.3 °C. FTIR (cm<sup>-1</sup>) 3365, 1735, 1678, 1579, 1504, 1446, 1338, 1271, 833, 746. <sup>1</sup>H NMR (400 MHz, DMSO-d<sub>6</sub>) δ ppm 3.14 (dd, J= 5.2, 18.1 Hz, 1H, pyrazoline CH<sub>2</sub>), 3.93-4.0 (m, 1H, pyrazoline CH<sub>2</sub>), 5.27 (d, J= 16.2 Hz, 1H, CH<sub>2</sub>), 5.46 (d, J= 16.3 Hz, 1H, CH<sub>2</sub>), 5.80 (dd, J= 5.2, 12.0 Hz, 1H, pyrazoline CH), 7.10 (d, J= 8.8 Hz, 2H, aromatic), 7.22-7.25 (m, 1H, aromatic), 7.29-7.34 (m, 4H, aromatic), 7.47-7.51 (m, 1H, aromatic), 7.53 (d, J= 8.8 Hz, 2H, aromatic), 7.74 (s, 1H, benzylidene), 7.88–7.91 (m, 2H, aromatic), 12.52 (bs, 1H, NH proton). <sup>13</sup>C-NMR (100 MHz, DMSO-d<sub>6</sub>) δ 40.45, 57.47, 65.69, 115.44, 115.77, 115.98, 120.64, 125.83, 127.17, 127.78, 128.36, 129.08, 129.37, 129.45, 131.67, 131.86, 132.77, 137.45, 154.85, 159.73, 164.69, 168.01. Theoretical mass: 535.97, LC-MS (m/z, I%): 533.9 [(M-H)<sup>+</sup>, 100%]. HPLC Purity: % Area 96.36, Retention Time 5.11 mins.

5-(4-(2-(3-(4-fluorophenyl)-5-(furan-2-yl)-4,5-dihydro-1H-pyrazol-1-yl)-2-oxoethoxy)benzylidene)thiazolidine-2,4-dione (**14c**). Off white colour. Yield 0.73 g (60%). M.P. 252.7 °C. FTIR (cm<sup>-1</sup>) 3406, 1734, 1683, 1585, 1508, 1456, 1338, 1259, 833. <sup>1</sup>H-NMR (400 MHz, DMSO-d<sub>6</sub>) δ ppm 3.43 (dd, J= 4.4, 18.1 Hz, 1H, pyrazoline CH<sub>2</sub>), 3.72-3.80 (m, 1H, pyrazoline CH<sub>2</sub>), 5.20 (d, J= 15.9 Hz, 1H, CH<sub>2</sub>), 5.28 (d, J= 16.2 Hz, 1H, CH<sub>2</sub>), 5.70 (dd, J= 4.4, 11.6 Hz, 1H, pyrazoline CH), 6.39 (d, J= 7.7 Hz, 2H, aromatic), 7.06 (d, J= 8.4 Hz, 2H, aromatic), 7.35 (t, J= 8.6 Hz, 2H, aromatic), 7.52 (d, J= 8.4 Hz, 2H, aromatic), 7.59 (s, 1H, aromatic), 7.74 (s, 1H, benzylidene), 7.9-7.95 (m, 2H, aromatic), 12.57 (bs, 1H, NH proton). <sup>13</sup>C-NMR (100 MHz, DMSO-d<sub>6</sub>) δ 40.57, 57.54, 65.45, 115.44, 120.47, 125.78, 126.95, 127.78, 128.34, 128.78, 129.09, 130.43, 130.76, 131.75, 131.87, 132.74, 137.51, 155.74, 159.76, 164.67, 167.35, 167.94. Theoretical mass: 491.49, LC-MS (m/z, I%): 490.0 [(M-H)<sup>+</sup>, 100%]. HPLC Purity: % Area 97.50, Retention Time 4.41 mins.

5-(4-(2-(3-(4-fluorophenyl)-5-(4-(trifluoromethyl)phenyl)-4,5-dihydro-1H-pyrazol-1-yl)-2-oxoethoxy)benzylidene)thiazolidine-2,4-dione (**14d**). Off white colour. Yield 0.72 g (64%). M.P. 263.6 °C. FTIR (cm<sup>-1</sup>) 3302, 1734, 1678, 1637, 1583, 1541, 1506, 1456, 1423, 1261, 1180, 827. <sup>1</sup>H NMR (400 MHz, DMSO-d<sub>6</sub>) δ ppm 3.26 (dd, J= 5.2, 18.8 Hz, 1H, pyrazoline CH<sub>2</sub>), 3.89-3.96 (m, 1H, pyrazoline CH<sub>2</sub>), 5.26 (d, J= 16.4 Hz, 1H, CH<sub>2</sub>), 5.39 (d, J= 16.0 Hz, 1H, CH<sub>2</sub>), 5.69 (d, J= 6.8 Hz, 1H, pyrazoline CH), 7.07 (d, J= 8.0 Hz, 2H, aromatic), 7.34 (t, J= 8.4 Hz, 2H, aromatic), 7.51 (t, J= 8.4 Hz, 4H, aromatic), 7.70-7.73 (m, 3H, benzylidene and aromatic), 7.90 (m, 2H, aromatic), 12.55 (bs, 1H, NH

proton).  $^{13}\text{C}$ -NMR (100 MHz, DMSO- $d_6$ )  $\delta$  41.59, 59.69, 65.48, 115.43, 115.76, 115.98, 120.48, 125.63, 125.77, 126.57, 127.22, 129.36, 129.45, 131.70, 131.86, 146.16, 154.71, 159.74, 162.23, 164.66, 167.38, 167.91. Theoretical mass: 569.53, LC-MS (m/z, I%): 568.1 [(M-H) $^+$ , 100%]. HPLC Purity: % Area 96.38, Retention Time 4.69 mins.

5-(4-(2-(3,5-bis(4-fluorophenyl)-4,5-dihydro-1H-pyrazol-1-yl)-2-oxoethoxy)benzylidene) thiazolidine-2,4-dione (**14e**). Cream colour. Yield 0.76 g (62%). M.P. 248.6 °C. FTIR ( $\text{cm}^{-1}$ ) 3387, 1732, 1681, 1583, 1506, 1456, 1419, 1259, 1141, 848.  $^1\text{H}$ -NMR (400 MHz, DMSO- $d_6$ )  $\delta$  ppm 3.20 (dd, J= 3.6, 18.0 Hz, 1H, pyrazoline  $\text{CH}_2$ ), 3.84-3.92 (m, 1H, pyrazoline  $\text{CH}_2$ ), 5.24 (d, J= 16.4 Hz, 1H,  $\text{CH}_2$ ), 5.36 (d, J= 16.4 Hz, 1H,  $\text{CH}_2$ ), 5.60 (d, J= 7.2 Hz, 1H, pyrazoline CH), 7.06 (d, J= 8.4 Hz, 2H, aromatic), 7.16 (t, J= 8.4 Hz, 2H, aromatic), 7.29-7.36 (m, 4H, aromatic), 7.52 (d, J= 8.0 Hz, 2H, aromatic), 7.74 (m, 1H, benzylidene), 7.89-7.92 (m, 2H, aromatic), 12.51 (bs, 1H, NH proton).  $^{13}\text{C}$ -NMR (100 MHz, DMSO- $d_6$ )  $\delta$  41.74, 59.40, 65.50, 115.27, 115.42, 115.48, 115.74, 115.96, 120.41, 125.73, 127.72, 127.80, 129.31, 129.39, 131.74, 131.85, 137.84, 154.64, 159.78, 162.19, 162.56, 164.49, 167.34, 167.90. Theoretical mass: 519.52, LC-MS (m/z, I%): 518.0 [(M-H) $^+$ , 100%]. HPLC Purity: % Area 96.42, Retention Time 4.47 mins.

5-(4-(2-(5-(2,4-difluorophenyl)-3-(4-fluorophenyl)-4,5-dihydro-1H-pyrazol-1-yl)-2-oxoethoxy)benzylidene)thiazolidine-2,4-dione (**14f**). Pale yellow colour. Yield 0.66 g (69%). M.P. 241.6 °C. FTIR ( $\text{cm}^{-1}$ ) 3383, 1730, 1683, 1647, 1583, 1506, 1456, 1425, 1263, 1178, 1143, 854.  $^1\text{H}$  NMR (400 MHz, DMSO- $d_6$ )  $\delta$  ppm 3.27 (dd, J= 5.6, 18.4 Hz, 1H, pyrazoline  $\text{CH}_2$ ), 3.87-3.95 (m, 1H, pyrazoline  $\text{CH}_2$ ), 5.23 (d, J= 16.4 Hz, 1H,  $\text{CH}_2$ ), 5.35 (d, J= 16.0 Hz, 1H,  $\text{CH}_2$ ), 5.70 (dd, J= 5.2, 12.0 Hz, 1H, pyrazoline CH), 7.06 (d, J= 8.4 Hz, 3H, aromatic), 7.25 (t, J= 9.6 Hz, 1H, aromatic), 7.32 (t, J= 8.8 Hz, 3H, aromatic), 7.52 (d, J= 8.8 Hz, 2H, aromatic), 7.74 (s, 1H, benzylidene), 7.91 (t, J= 7.6 Hz, 2H, aromatic), 12.51 (bs, 1H, NH proton).  $^{13}\text{C}$ -NMR (100 MHz, DMSO- $d_6$ )  $\delta$  40.46, 54.52, 65.37, 104.05, 115.34, 115.70, 115.92, 120.45, 125.72, 127.27, 129.23, 129.32, 131.62, 131.78, 154.80, 159.68, 162.20, 164.49, 167.34, 167.86. Theoretical mass: 537.51, LC-MS (m/z, I%): 536.0 [(M-H) $^+$ , 100%]. HPLC Purity: % Area 97.44, Retention Time 4.47 mins.

5-(4-(2-(3-(4-fluorophenyl)-5-(p-tolyl)-4,5-dihydro-1H-pyrazol-1-yl)-2-oxoethoxy)benzylidene) thiazolidine-2,4-dione (**14g**). Creamish solid. Yield 0.7 g (65%). M.P. 285.1 °C. FTIR ( $\text{cm}^{-1}$ ) 3383, 3117, 1732, 1676, 1637, 1583, 1506, 1458, 1419, 1259, 854.  $^1\text{H}$ -NMR (400 MHz, DMSO- $d_6$ )  $\delta$  ppm 2.26 (s, 3H,  $\text{CH}_3$ ), 3.16 (dd, J= 4.4, 18.4 Hz, 1H, pyrazoline  $\text{CH}_2$ ), 3.83-3.91 (m, 1H, pyrazoline  $\text{CH}_2$ ), 5.23 (d, J= 16.4 Hz, 1H,  $\text{CH}_2$ ), 5.36 (d, J= 16.0 Hz, 1H,  $\text{CH}_2$ ), 5.54 (dd, J= 4.4, 11.6 Hz, 1H, pyrazoline CH), 7.06 (d, J= 8.4 Hz, 2H, aromatic), 7.13 (s, 4H, aromatic), 7.33 (t, J= 8.8 Hz, 2H, aromatic), 7.52 (d, J= 8.4 Hz, 2H, aromatic), 7.74 (s, 1H, benzylidene), 7.90 (t, J= 7.6 Hz, 2H, aromatic), 12.52 (s, 1H, NH proton).  $^{13}\text{C}$ -NMR (100 MHz, DMSO- $d_6$ )  $\delta$  20.59, 41.84, 59.83, 65.52, 115.44, 115.97, 120.54, 125.48, 125.71, 129.17, 129.28, 129.36, 131.86, 136.56, 138.77, 154.97, 159.81, 164.37. Theoretical mass: 515.56, LC-MS (m/z, I%): 514.0 [(M-H) $^+$ , 100%]. HPLC Purity: % Area 96.65, Retention Time 5.26 mins.

5-(4-(2-(5-(3,4-dichlorophenyl)-3-(4-fluorophenyl)-4,5-dihydro-1H-pyrazol-1-yl)-2-oxoethoxy)benzylidene)thiazolidine-2,4-dione (**14j**). Off white solid. Yield 0.56 g (62%). M.P. 252.3 °C. FTIR (cm<sup>-1</sup>) 3302, 1732, 1683, 1591, 1508, 1444, 1273, 823, 690, 636. <sup>1</sup>H-NMR (400 MHz, DMSO-d<sub>6</sub>) δ ppm 3.17 (dd, J= 5.2, 18.4 Hz, 1H, pyrazoline CH<sub>2</sub>), 3.93-4.01 (m, 1H, pyrazoline CH<sub>2</sub>), 5.24 (d, J= 16.4 Hz, 1H, CH<sub>2</sub>), 5.44 (d, J= 16.4 Hz, 1H, CH<sub>2</sub>), 5.77 (d, J= 5.2, 11.6 Hz, 1H, pyrazoline CH), 7.10 (d, J= 8.8 Hz, 2H, aromatic), 7.27 (d, J= 8.4 Hz, 1H, aromatic), 7.33 (t, J= 8.8 Hz, 2H, aromatic), 7.39-7.40 (m, 1H, aromatic), 7.41 (d, J= 8.8 Hz, 2H, aromatic), 7.66 (d, J=1.6 Hz, 1H, aromatic), 7.74 (s, 1H, benzylidene), 7.88-7.92 (m, 2H, aromatic), 12.58 (bs, 1H, NH proton). <sup>13</sup>C-NMR (100 MHz, DMSO-d<sub>6</sub>) δ 40.45, 46.47, 57.47, 65.69, 115.45, 115.77, 115.98, 120.62, 125.83, 127.18, 127.78, 128.36, 129.08, 129.37, 129.45, 131.67, 131.86, 132.77, 137.45, 154.85, 159.73, 164.69, 168.01. Theoretical mass: 570.42, LC-MS (m/z, I%): 568.0 [(M-2H)<sup>+</sup>, 100%]. HPLC Purity: % Area 96.08, Retention Time 5.36 mins.

5-(4-(2-(3-(2,4-difluorophenyl)-5-(furan-2-yl)-4,5-dihydro-1H-pyrazol-1-yl)-2-oxoethoxy)benzylidene)thiazolidine-2,4-dione (**15c**). Pale yellow solid. Yield 0.84 g (61%). M.P. 220.6 °C. FTIR (cm<sup>-1</sup>) 3392, 1730, 1681, 1589, 1566, 1510, 1442, 1413, 1269, 1176, 1151, 819. <sup>1</sup>H-NMR (400 MHz, DMSO-d<sub>6</sub>) δ ppm 3.32–3.42 (m, 1H, pyrazoline CH<sub>2</sub>), 3.77–3.85 (m, 1H, pyrazoline CH<sub>2</sub>), 5.17 (d, J= 16.2 Hz, 1H, CH<sub>2</sub>), 5.25 (d, J= 16.2 Hz, 1H, CH<sub>2</sub>), 5.68 (dd, J= 4.8, 11.8 Hz, 1H, pyrazoline CH), 6.38–6.41 (m, 2H, aromatic), 7.04 (d, J= 8.8 Hz, 2H, aromatic), 7.21–7.26 (m, 1H, aromatic), 7.39–7.44 (m, 1H, aromatic), 7.51 (d, J= 8.8 Hz, 2H, aromatic), 7.59 (d, J= 0.8 Hz, 1H, aromatic), 7.73 (s, 1H, benzylidene), 7.99–8.05 (m, 1H, aromatic), 12.56 (bs, 1H, NH proton). <sup>13</sup>C-NMR (100 MHz, DMSO-d<sub>6</sub>) δ 43.73, 59.45, 65.38, 105.33, 112.40, 115.41, 120.47, 125.49, 125.75, 129.19, 131.72, 131.85, 136.61, 138.63, 151.27, 159.76, 164.51, 167.93. Theoretical mass: 509.48, LC-MS (m/z, I%): 508.1 [(M-H)<sup>+</sup>, 100%]. HPLC Purity: % Area 97.50, Retention Time 4.41 mins.

5-(4-(2-(3-(2,4-difluorophenyl)-5-(4-fluorophenyl)-4,5-dihydro-1H-pyrazol-1-yl)-2-oxoethoxy)benzylidene)thiazolidine-2,4-dione (**15e**). Cream colour solid. Yield 0.8 g (77%). M.P. 228.2 °C. FTIR (cm<sup>-1</sup>) 3427, 1734, 1680, 1654, 1585, 1560, 1508, 1429, 1259, 1226, 1180, 1147, 821. <sup>1</sup>H-NMR (400 MHz, DMSO-d<sub>6</sub>) δ ppm 3.08–3.14 (m, 1H, pyrazoline CH<sub>2</sub>), 4.00–4.07 (m, 1H, pyrazoline CH<sub>2</sub>), 5.25 (d, J= 16.3 Hz, 1H, CH<sub>2</sub>), 5.45 (d, J= 16.3 Hz, 1H, CH<sub>2</sub>), 5.78 (dd, J= 5.2, 12.0 Hz, 1H, pyrazoline CH), 7.09 (d, J= 8.8 Hz, 2H, aromatic), 7.27–7.22 (m, 2H, aromatic), 7.35–7.30 (m, 2H, aromatic), 7.45–7.41 (m, 1H, aromatic), 7.48–7.50 (m, 1H, aromatic), 7.53 (d, J= 8.8 Hz, 2H, aromatic), 7.73 (s, 1H, benzylidene), 8.01–8.08 (m, 1H, aromatic), 12.55 (bs, 1H, NH proton). <sup>13</sup>C-NMR (100 MHz, DMSO-d<sub>6</sub>) δ 30.69, 43.80, 50.88, 54.92, 59.04, 65.25, 105.08, 105.33, 109.89, 111.95, 112.28, 112.47, 115.20, 115.42, 119.15, 119.76, 127.76, 127.85, 128.28, 130.93, 137.42, 138.38, 145.60, 151.05, 151.41, 160.17, 160.63, 163.91, 164.22, 167.04, 167.39, 169.72, 175.00. Theoretical mass: 537.51, LC-MS (m/z, I%): 536.0 [(M-H)<sup>+</sup>, 100%]. HPLC Purity: % Area 97.72, Retention Time 4.40 mins.

5-(4-(2-(3-(2,4-difluorophenyl)-5-(p-tolyl)-4,5-dihydro-1H-pyrazol-1-yl)-2-oxoethoxy)benzylidene)thiazolidine-2,4-dione (**15g**). Off white solid. Yield 0.72 g (63%). M.P. 256.3 °C. FTIR (cm<sup>-1</sup>) 3394, 3045, 1732, 1680, 1581, 1504, 1452, 1423, 1259, 1178, 1145, 850. <sup>1</sup>H-NMR (400 MHz, DMSO-d<sub>6</sub>) δ ppm 2.26 (s, 3H, CH<sub>3</sub>), 3.13 (dd, J= 2.8, 18.4 Hz, 1H, pyrazoline CH<sub>2</sub>), 3.90-3.97 (m, 1H, pyrazoline CH<sub>2</sub>), 5.22 (d, J= 16.0 Hz, 1H, CH<sub>2</sub>), 5.35 (d, J= 16.4 Hz, 1H, CH<sub>2</sub>), 5.52 (dd, J= 4.8, 12.0 Hz, 1H, pyrazoline CH), 7.05 (d, J= 8.8 Hz, 2H, aromatic), 7.14 (s, 4H, aromatic), 7.22-7.27 (m, 1H, aromatic), 7.38-7.44 (m, 1H, aromatic), 7.52 (d, J= 8.8 Hz, 2H, aromatic), 7.74 (s, 1H, benzylidene), 8.01-8.07 (m, 1H, aromatic), 12.53 (bs, 1H, NH proton). <sup>13</sup>C-NMR (100 MHz, DMSO-d<sub>6</sub>) δ 20.60, 43.74, 59.45, 65.48, 105.13, 112.40, 115.42, 120.47, 125.49, 125.75, 129.19, 131.72, 131.85, 136.61, 138.63, 151.03, 159.76, 164.58, 167.91. Theoretical mass: 533.55, LC-MS (m/z, I%): 532.0 [(M-H)<sup>+</sup>, 100%]. HPLC Purity: % Area 98.38, Retention Time 5.29 mins.

## 9. Structural characterization data

### 5-(4-(2-(3,5-diphenyl-4,5-dihydro-1H-pyrazol-1-yl)-2-oxoethoxy)benzylidene)thiazolidine-2,4-dione (13a).

#### a. FTIR

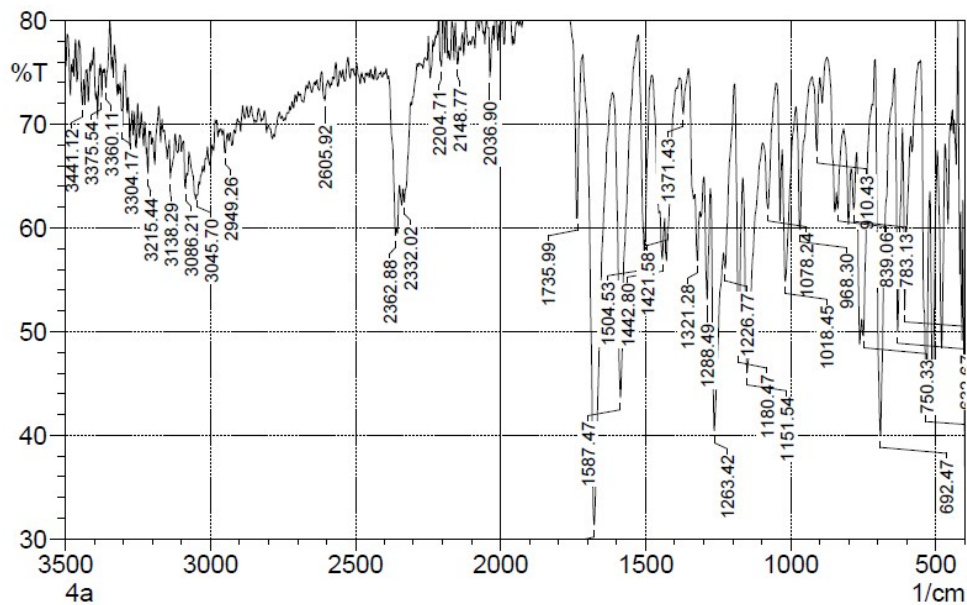

#### b. <sup>1</sup>H-NMR

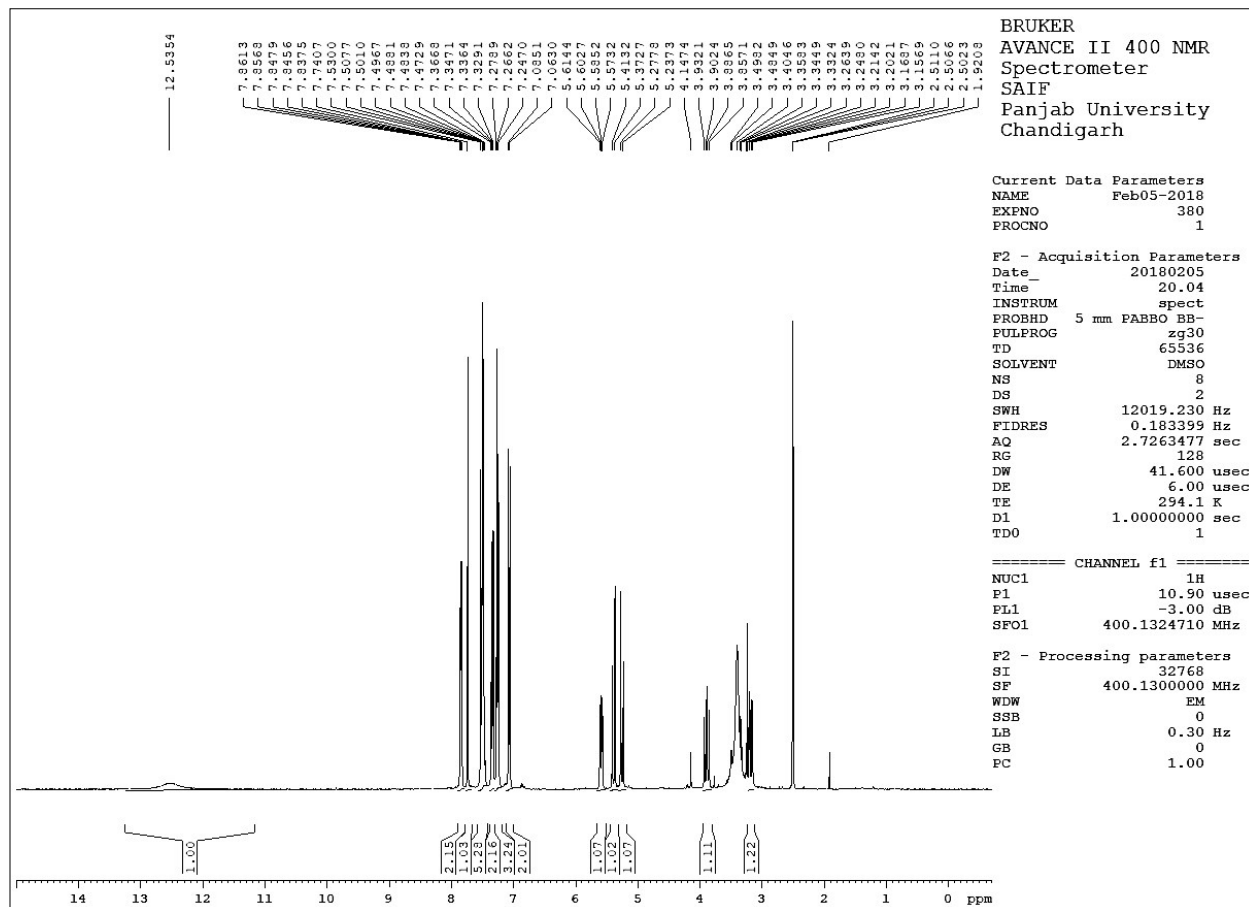

c. <sup>13</sup>C-NMR

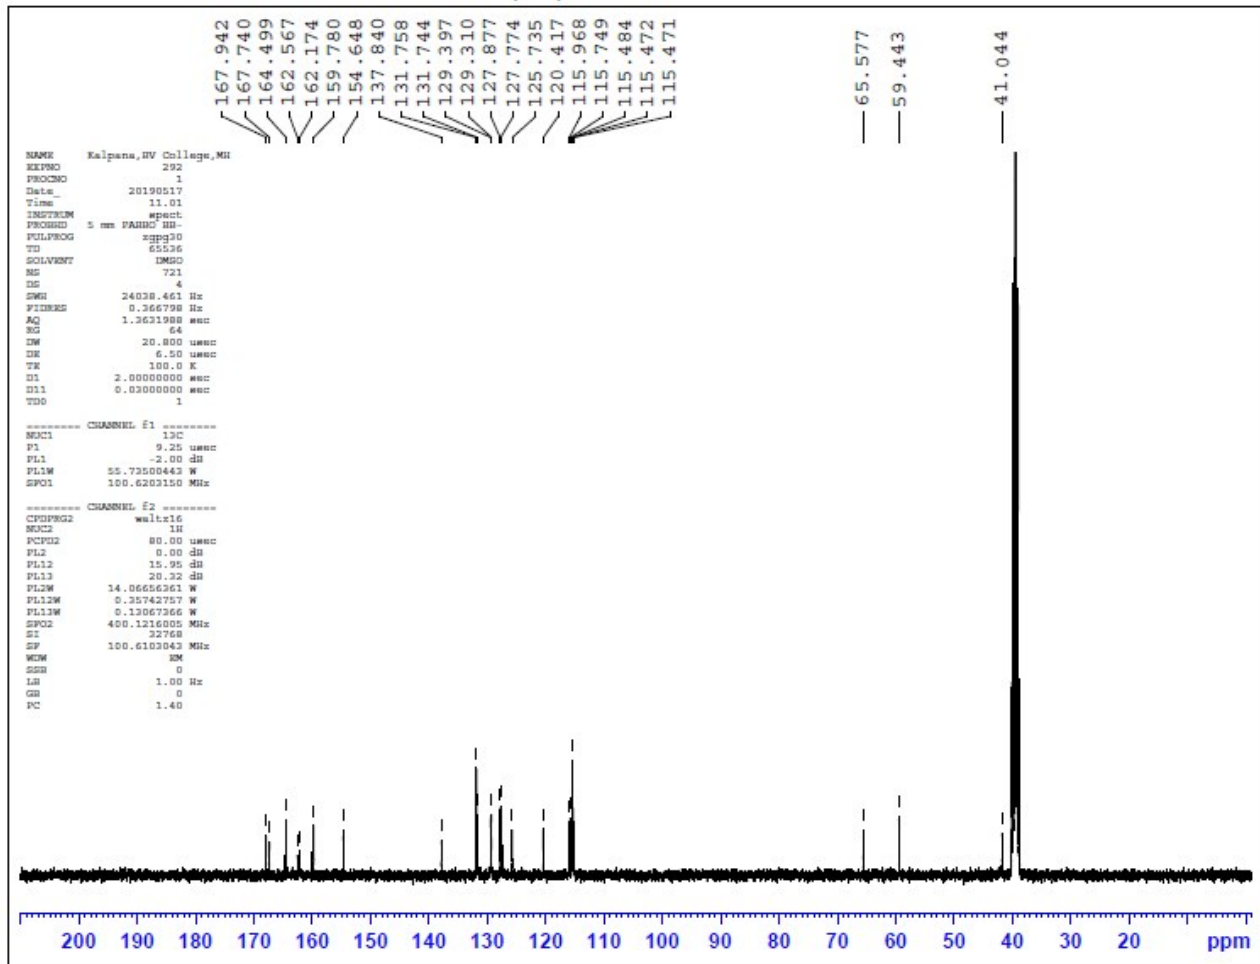

d. HPLC

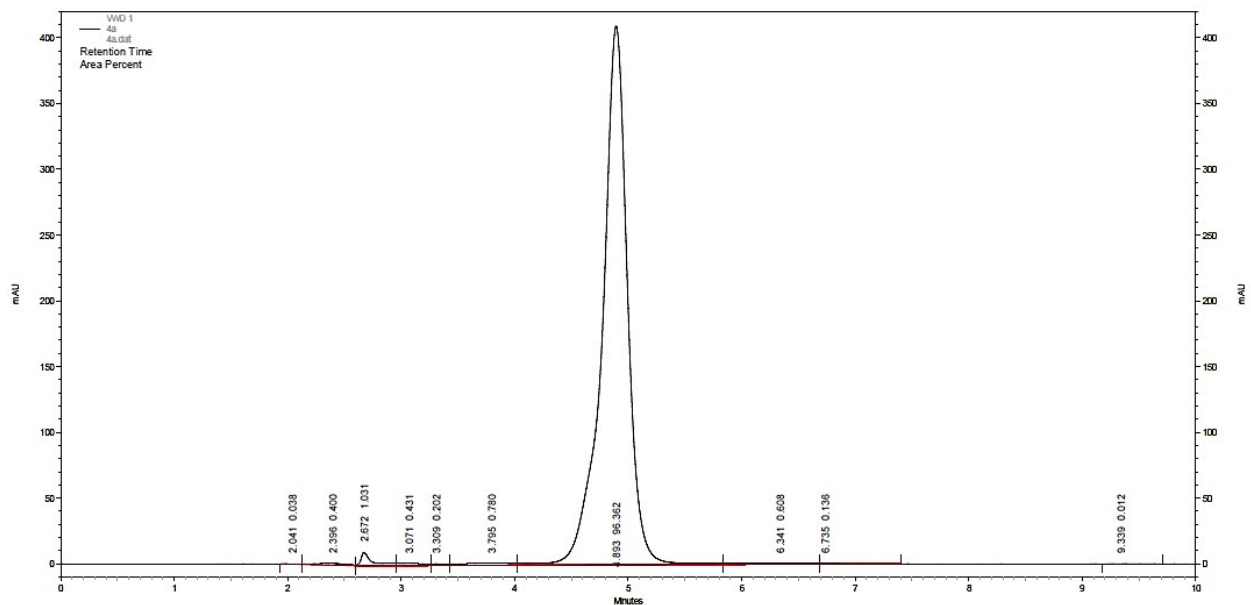

### e. Mass spectroscopy

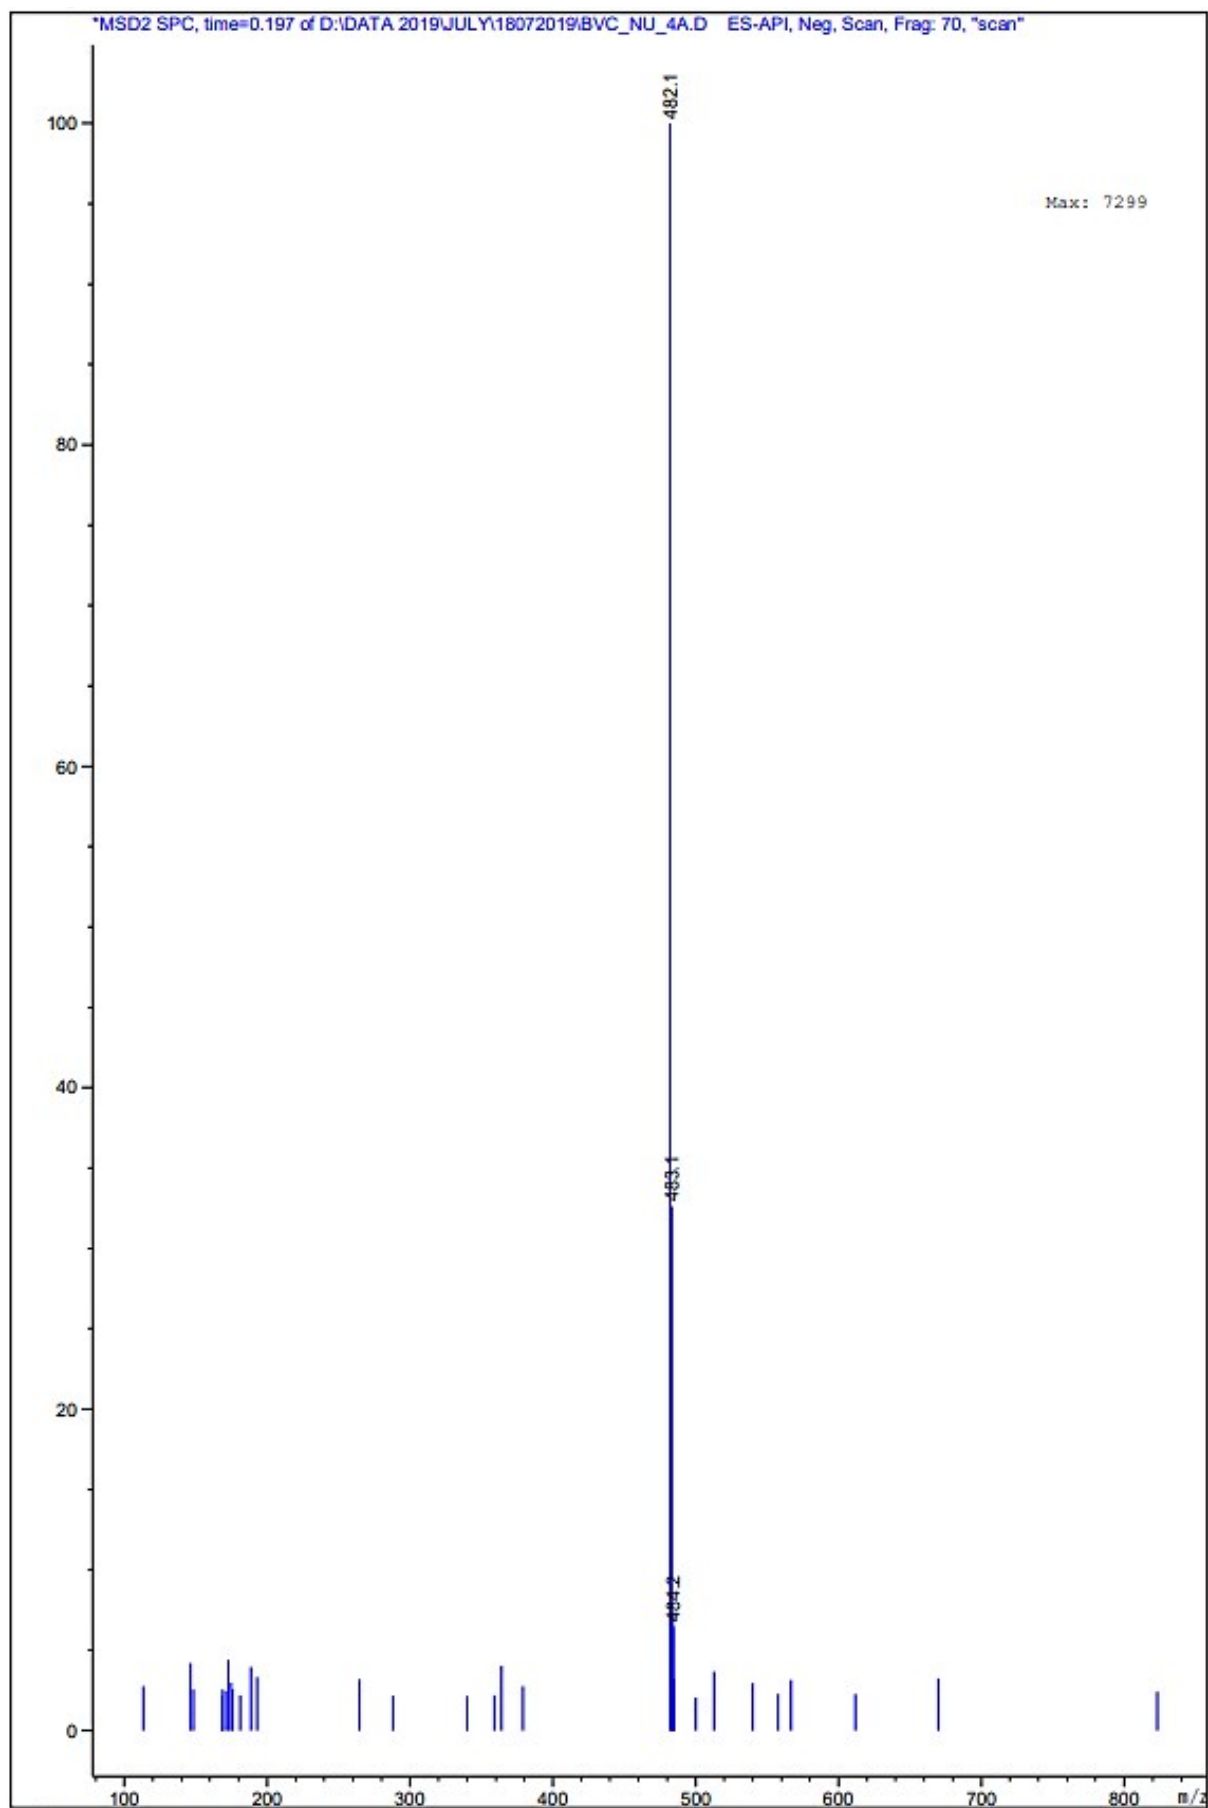

**5-(4-(2-(5-(2-chlorophenyl)-3-phenyl-4,5-dihydro-1H-pyrazol-1-yl)-2-oxoethoxy)benzylidene)thiazolidine-2,4-dione (13b).**

**a. FTIR**

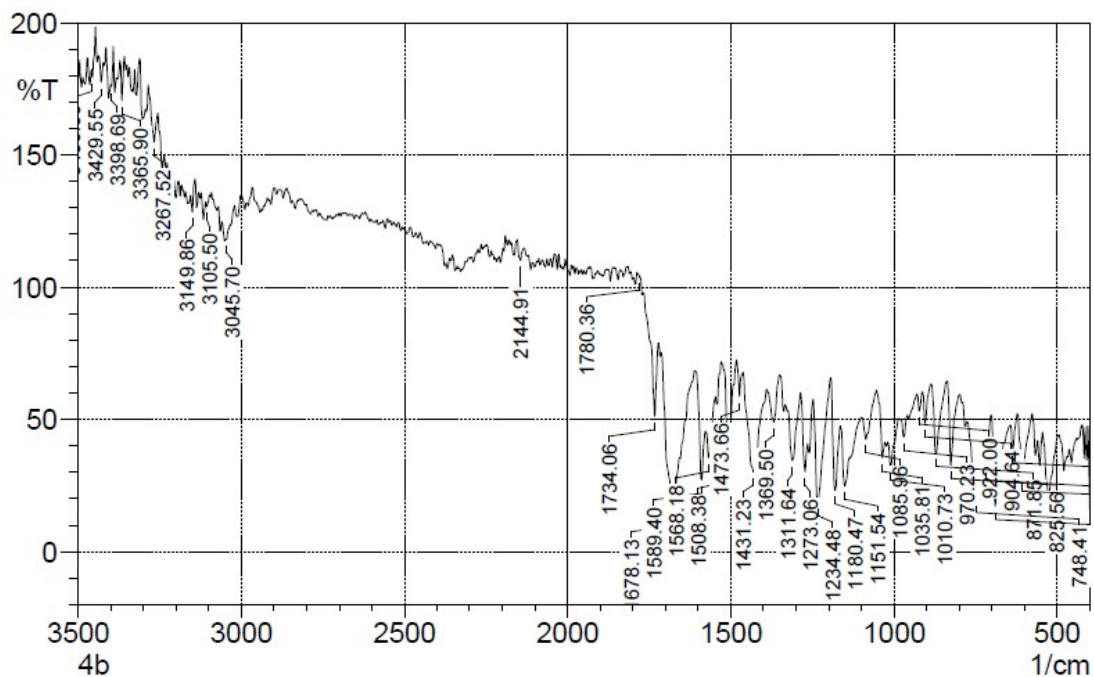

**b. <sup>1</sup>H-NMR**

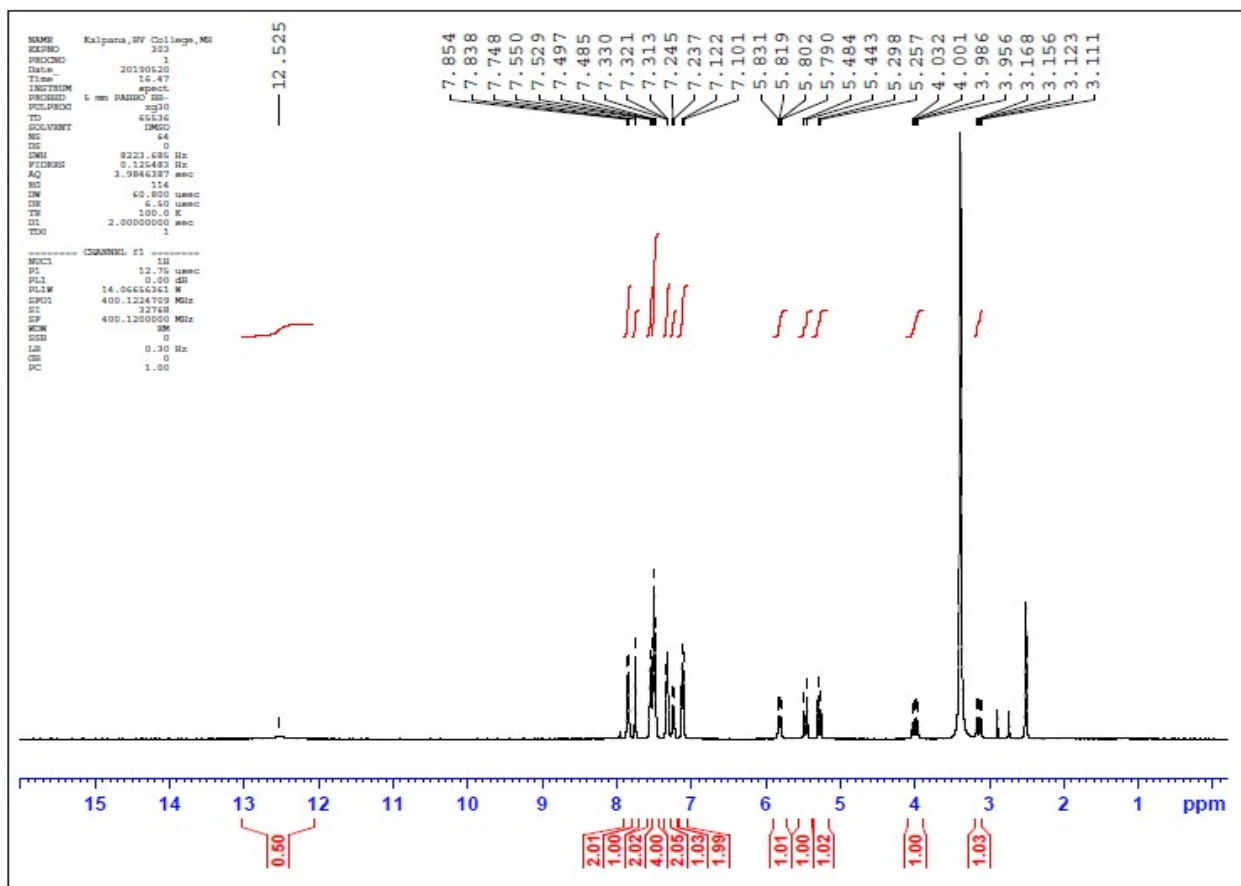



c. <sup>13</sup>C-NMR

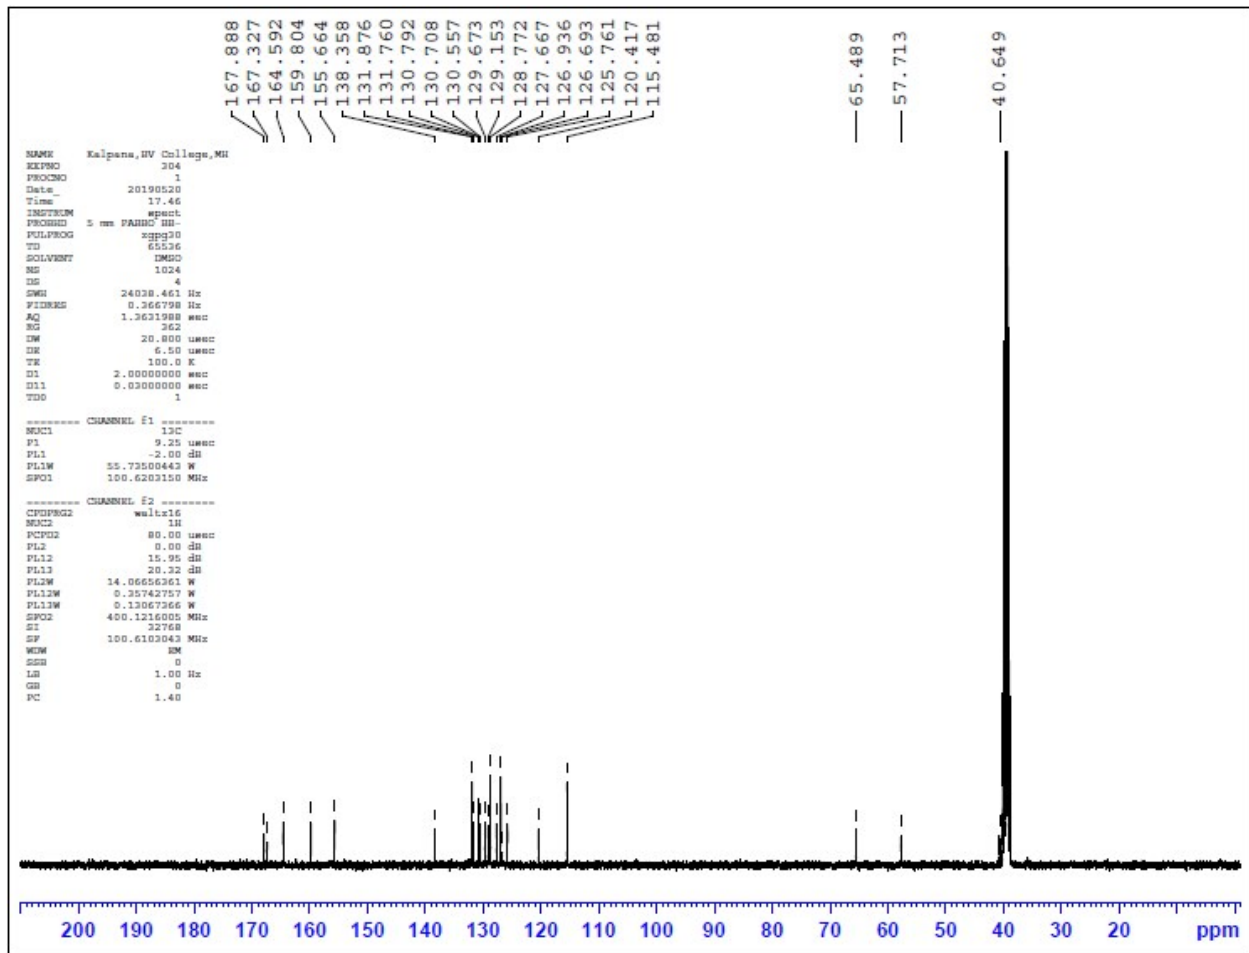

d. HPLC

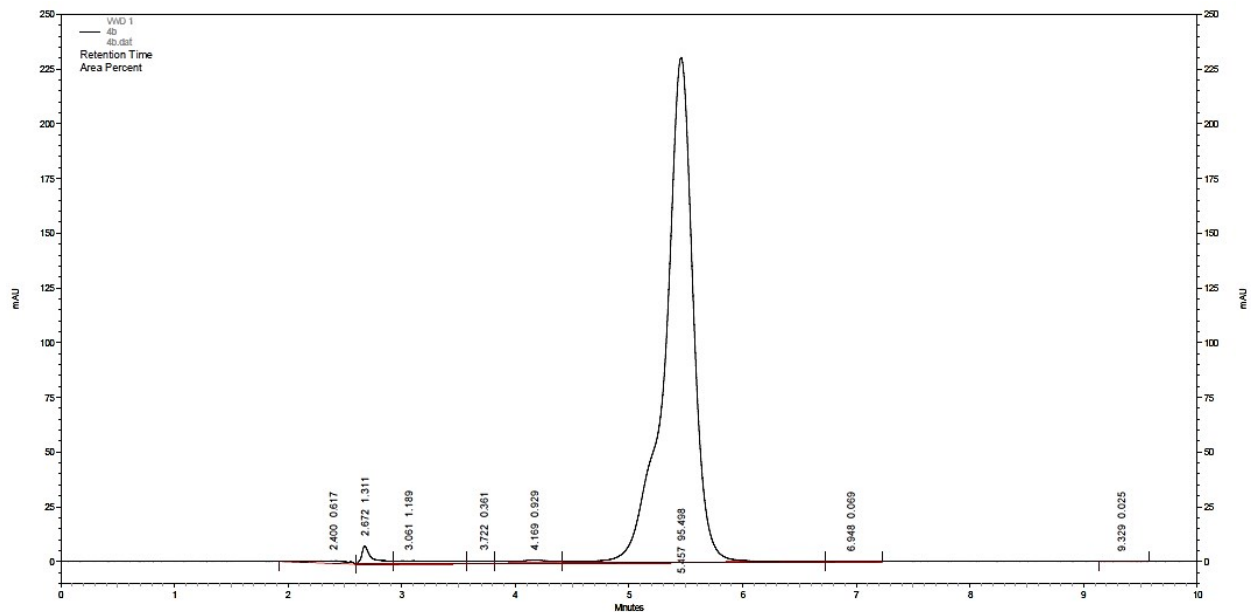

### e. Mass spectroscopy

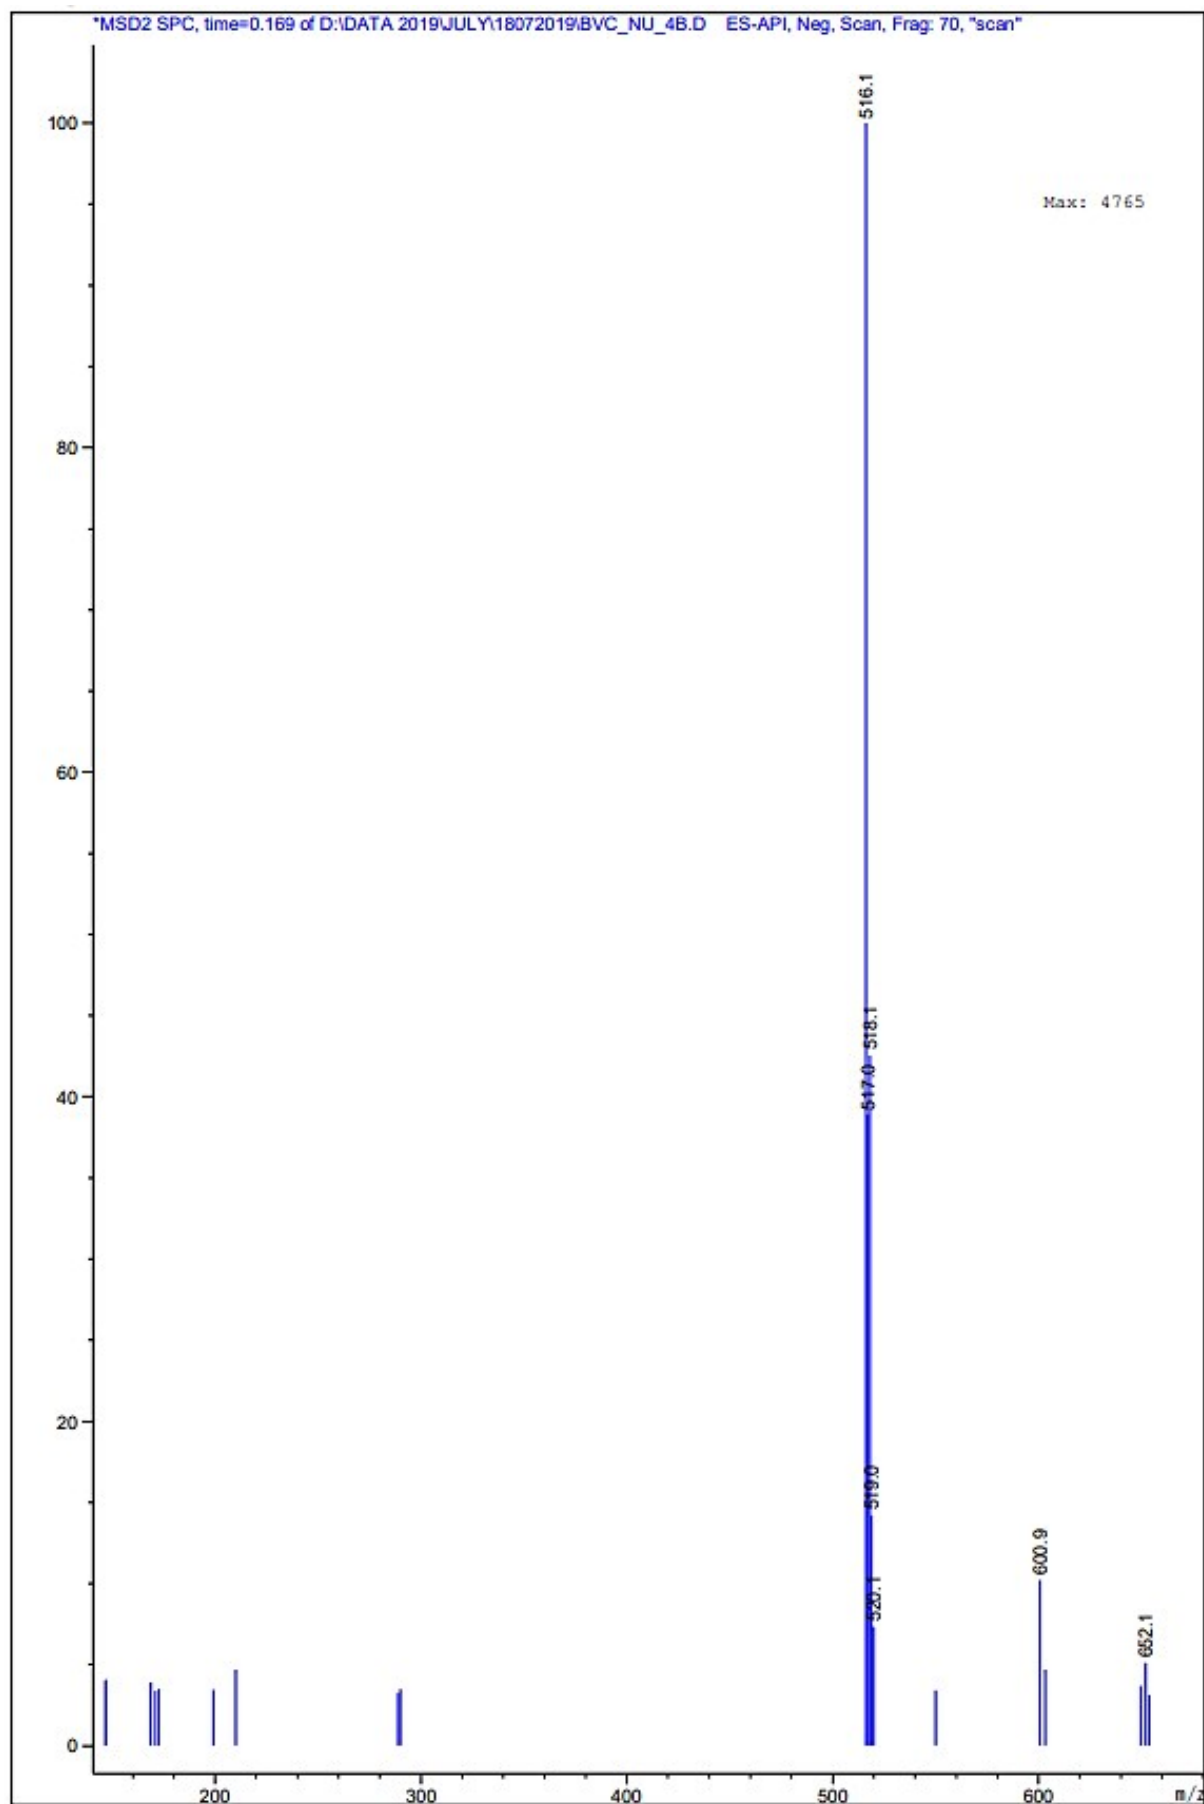

**5-(4-(2-oxo-2-(3-phenyl-5-(4-(trifluoromethyl)phenyl)-4,5-dihydro-1H-pyrazol-1-yl)ethoxy)benzylidene) thiazolidine-2,4-dione (13d).**

**a. FTIR**

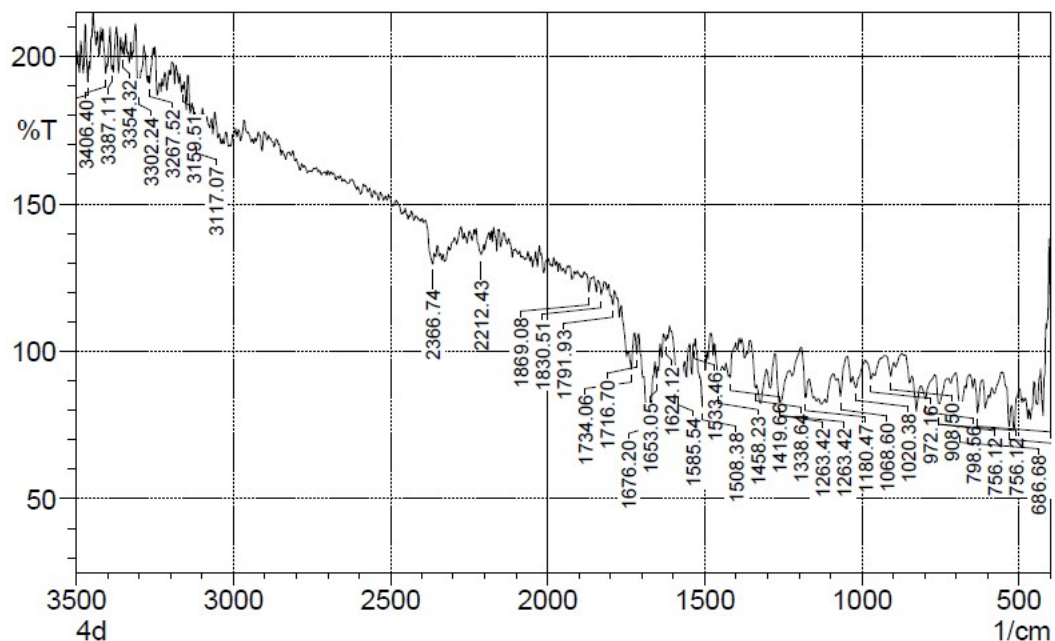

**b. <sup>1</sup>H-NMR**

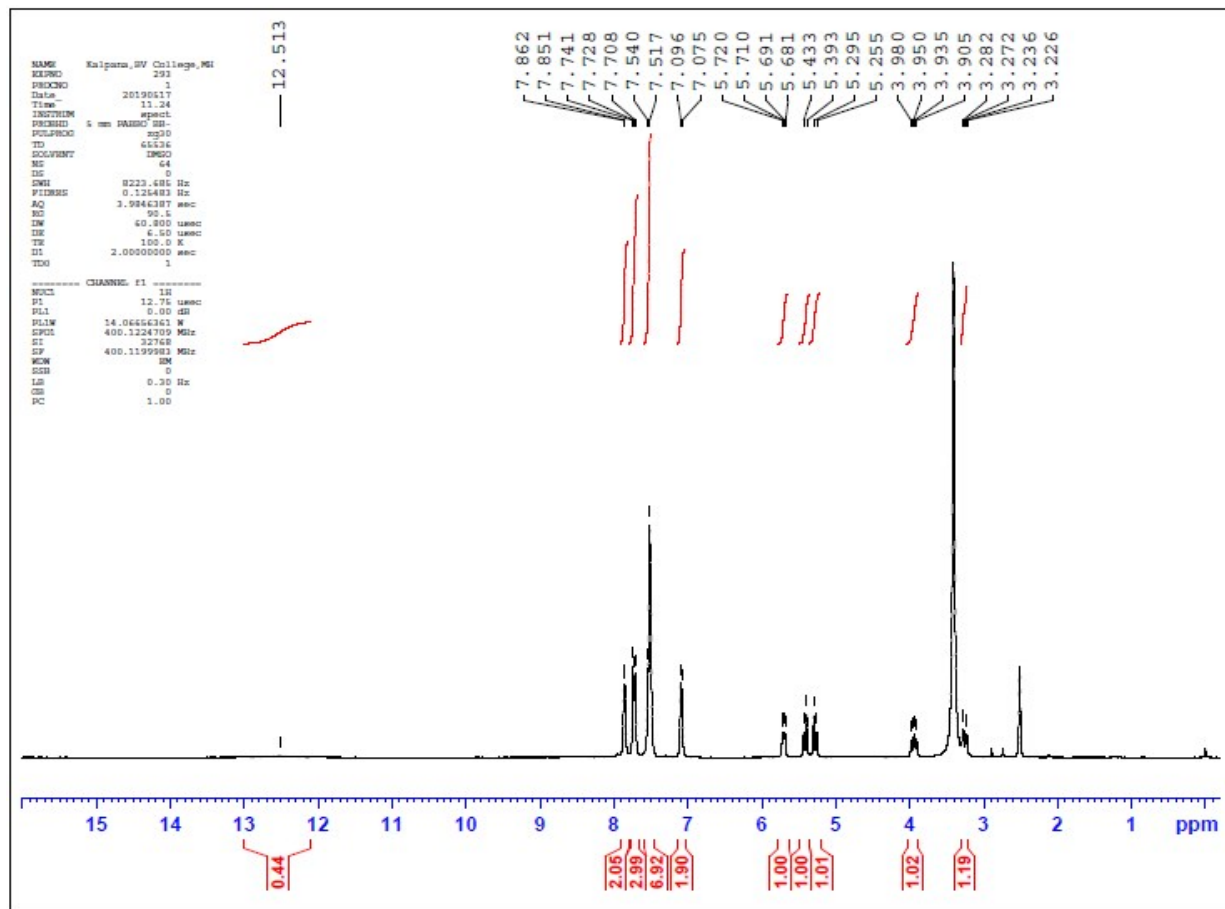

c. <sup>13</sup>C-NMR

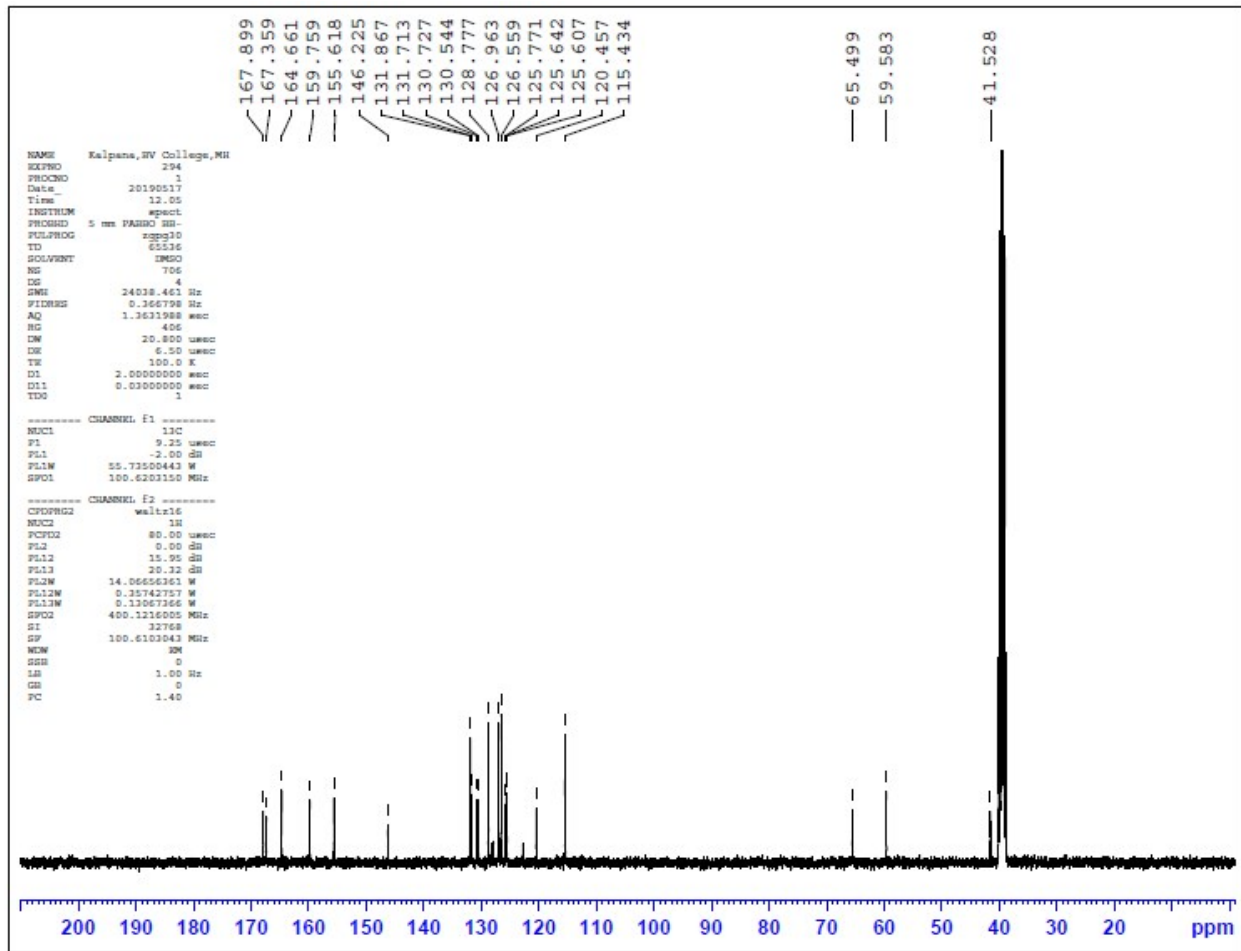

d. HPLC

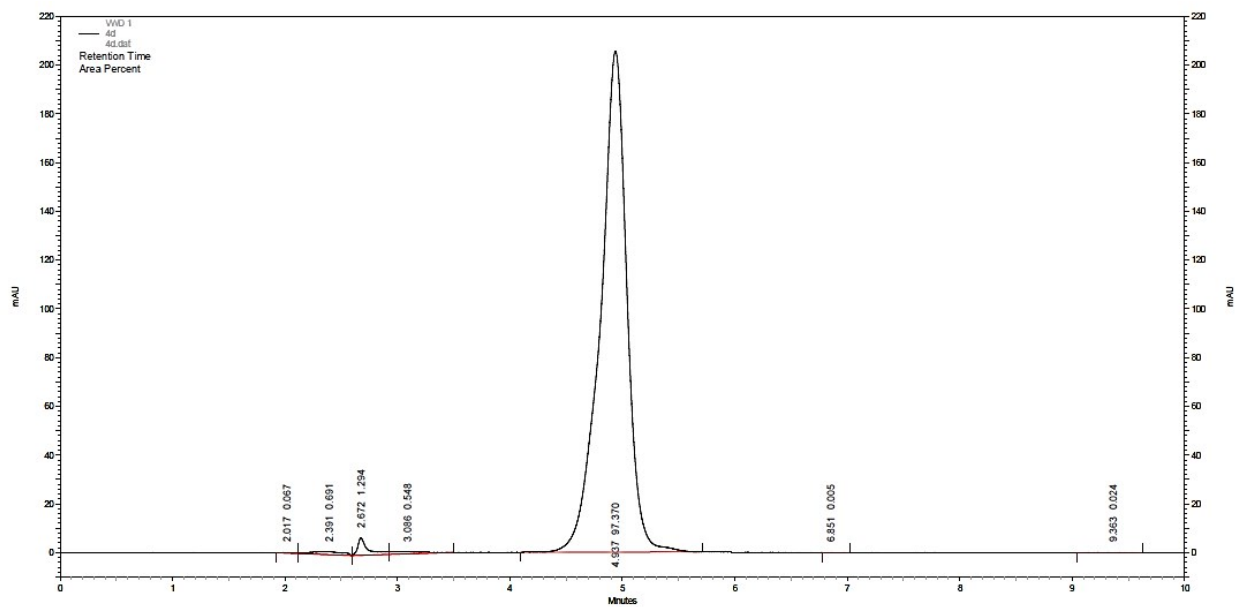

### e. Mass spectroscopy

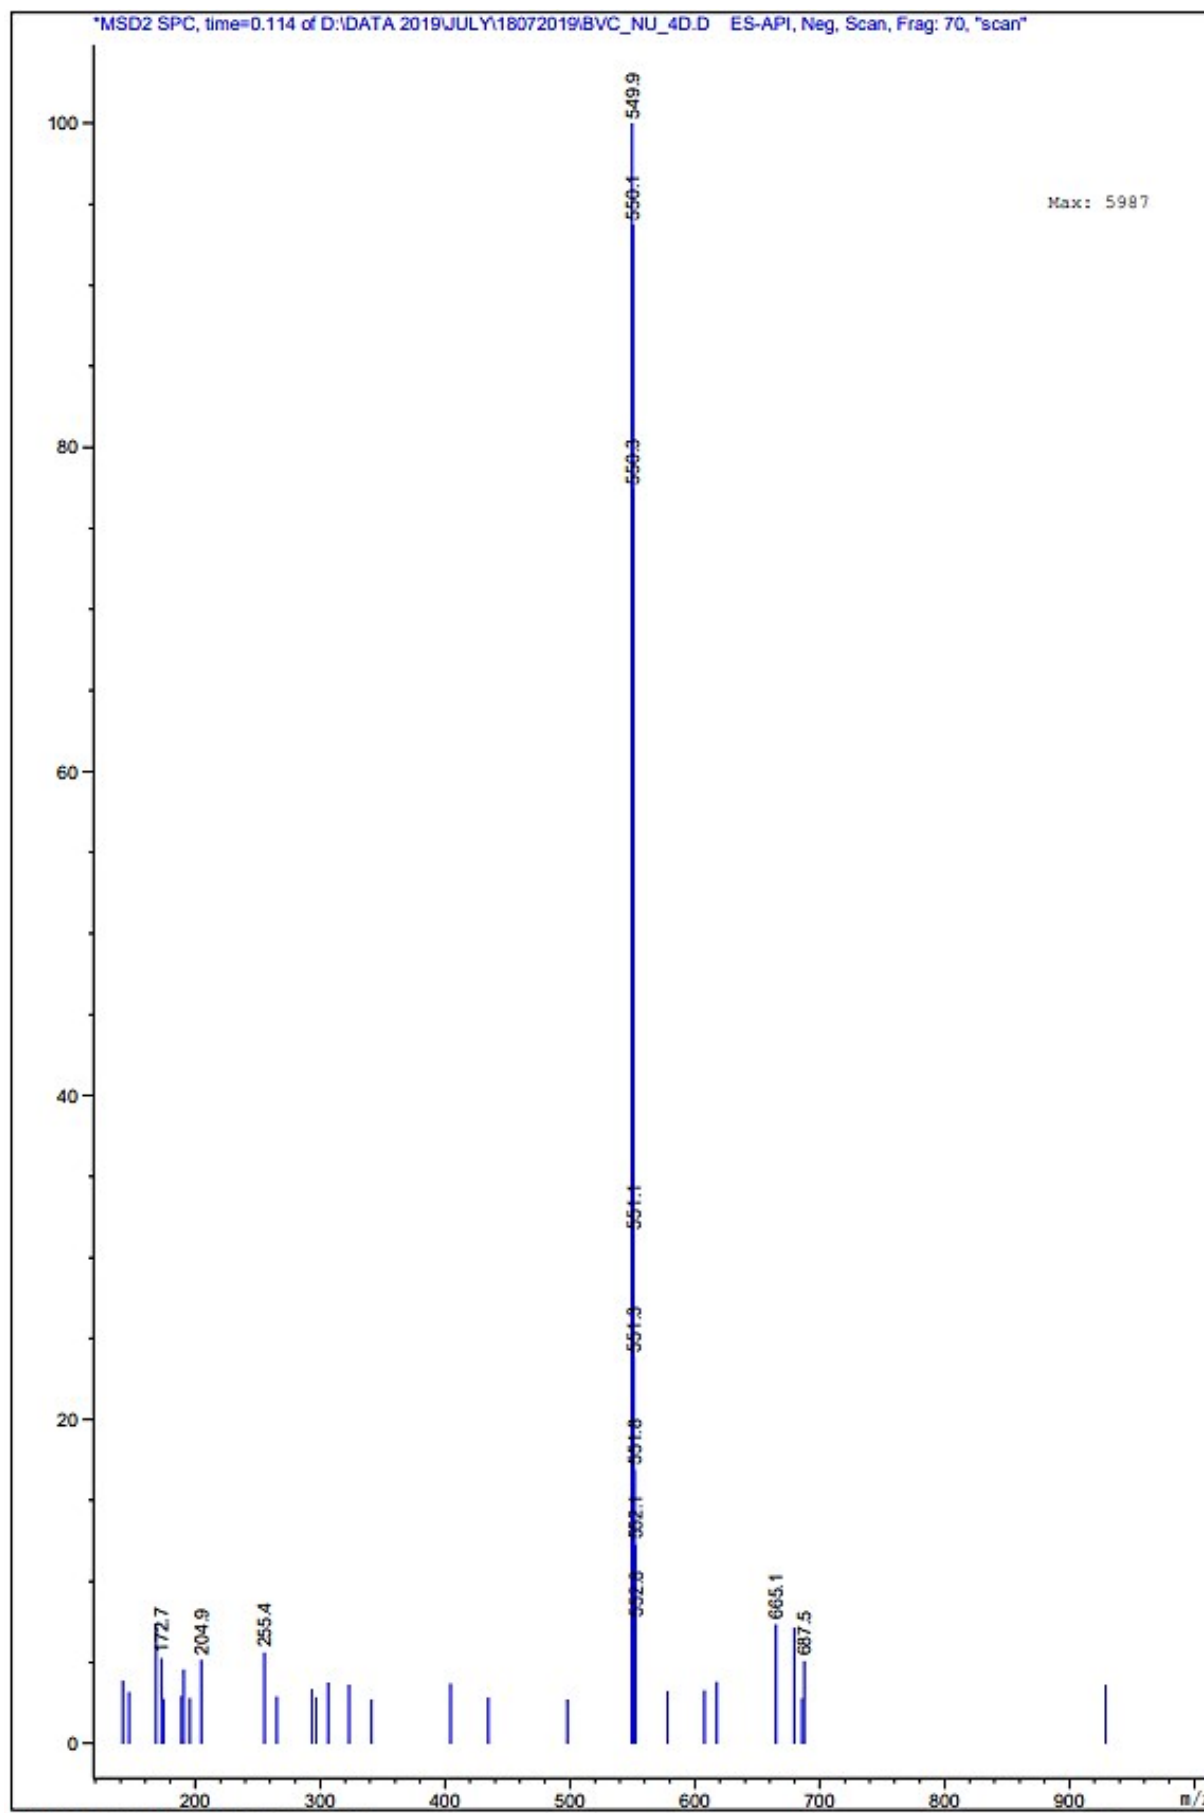

**5-(4-(2-(5-(4-fluorophenyl)-3-phenyl-4,5-dihydro-1H-pyrazol-1-yl)-2-oxoethoxy)benzylidene)thiazolidine-2,4-dione (13e).**

**a. FTIR**

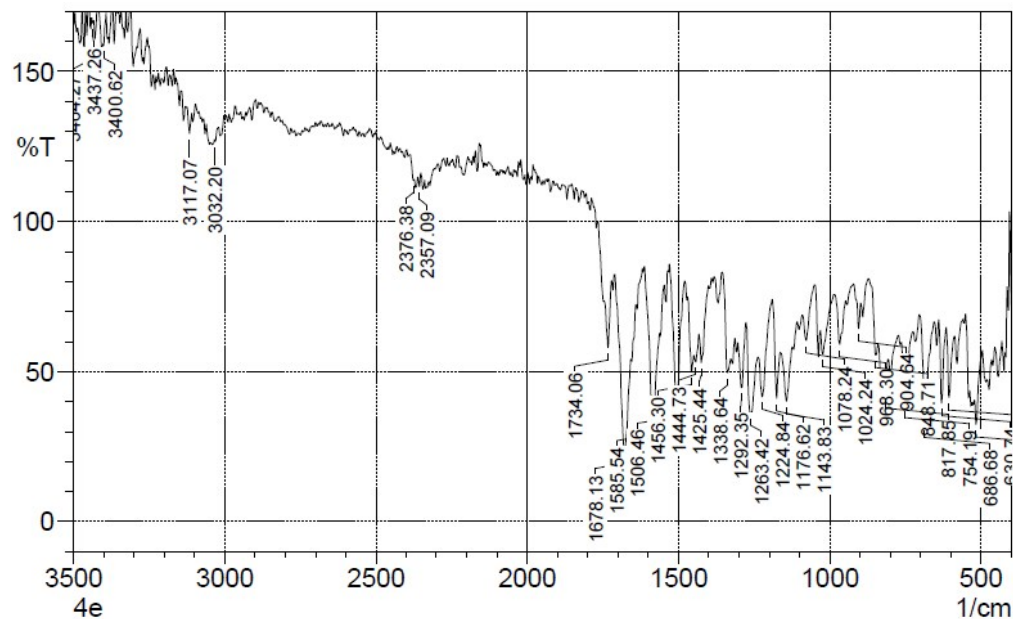

**b. <sup>1</sup>H-NMR**

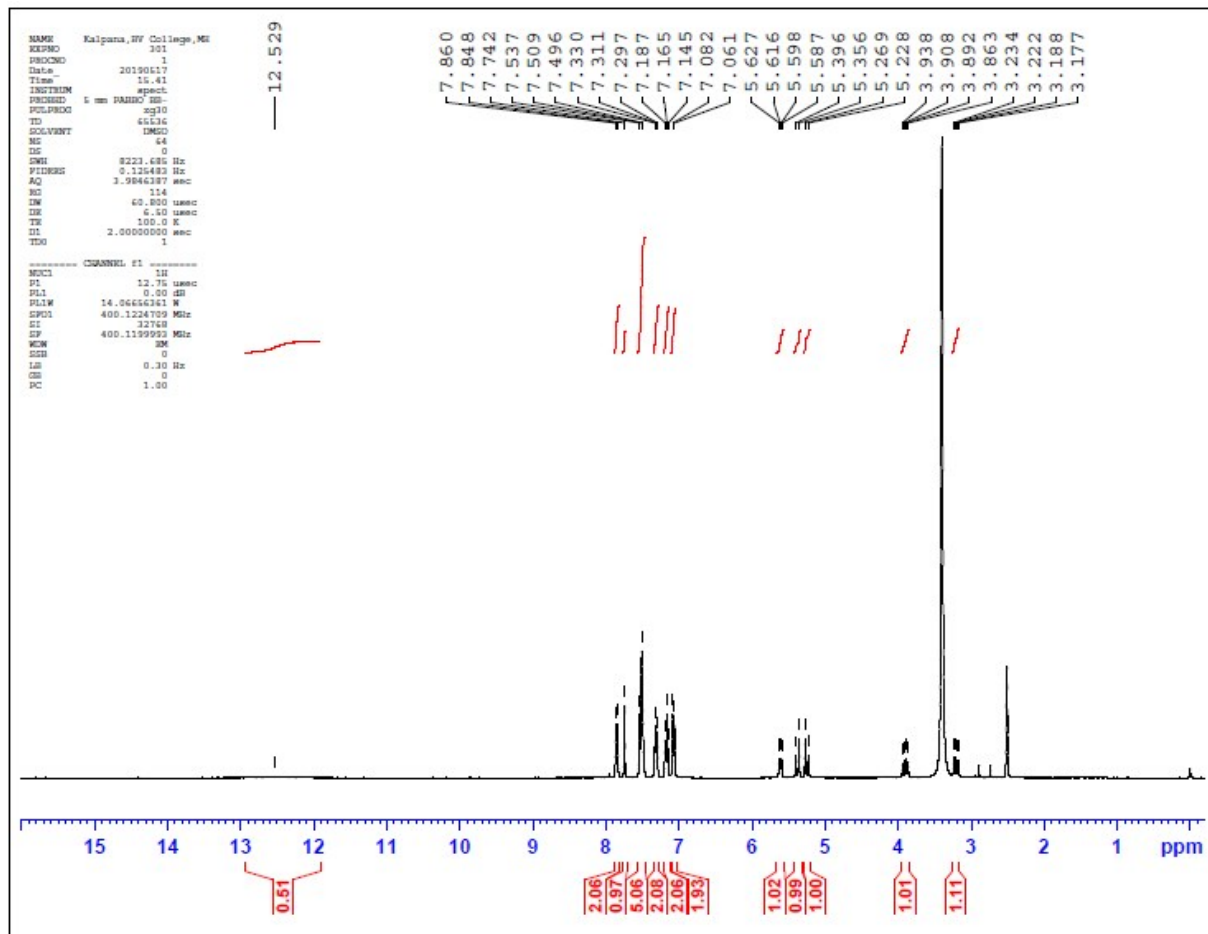

c. <sup>13</sup>C-NMR

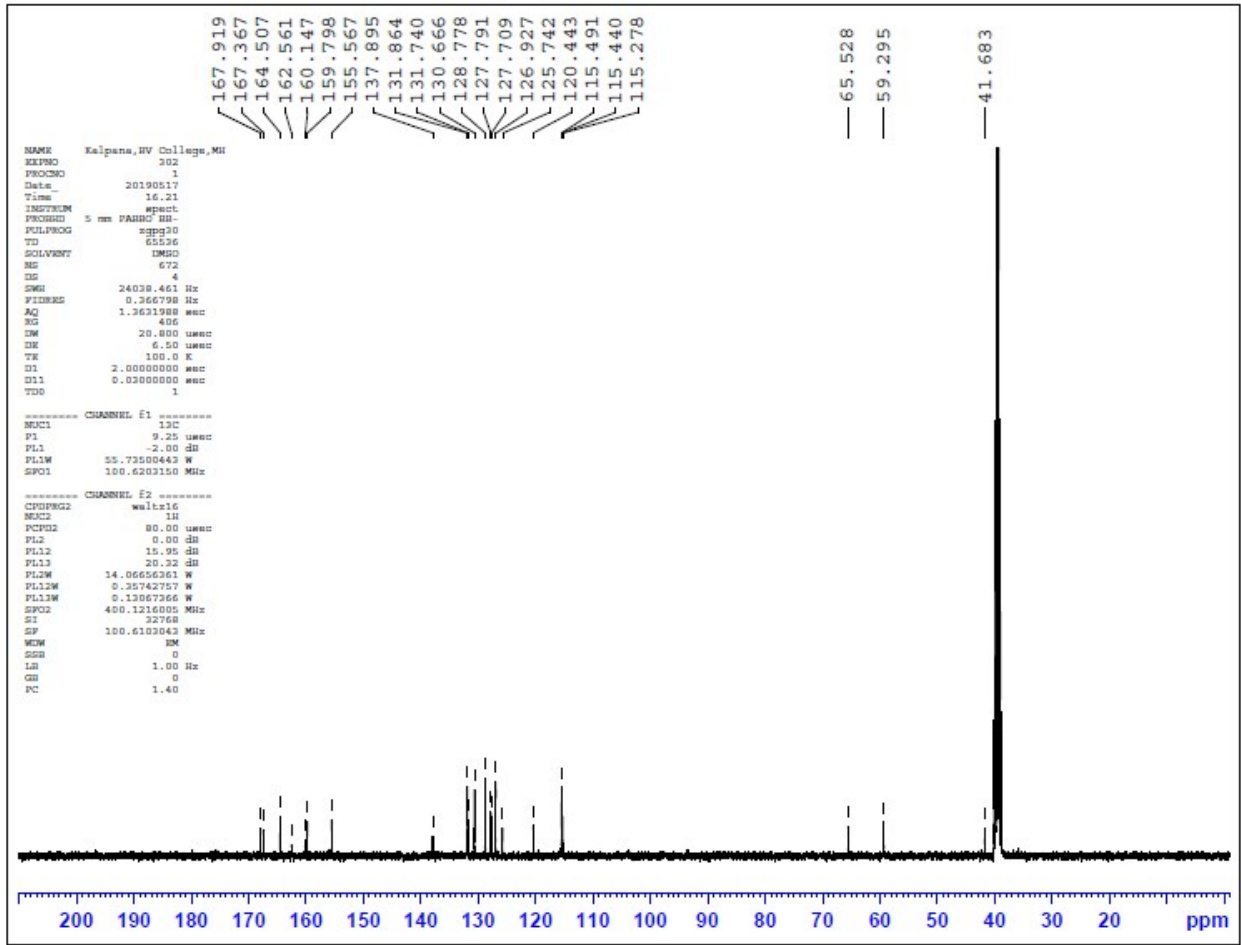

d. HPLC

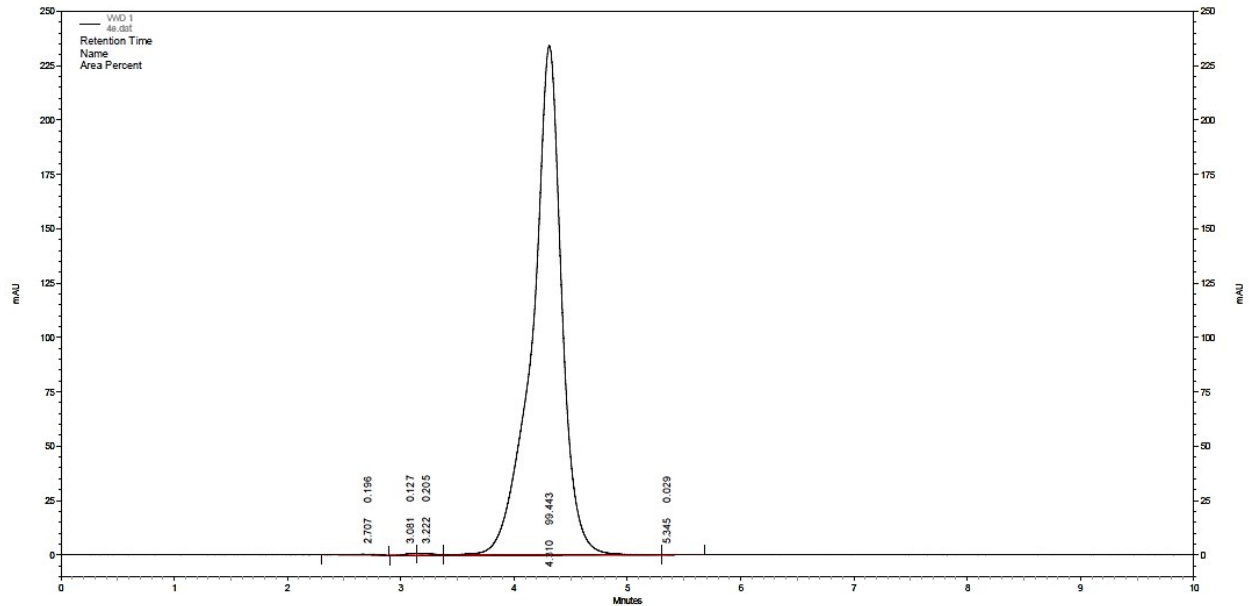

### e. Mass spectroscopy

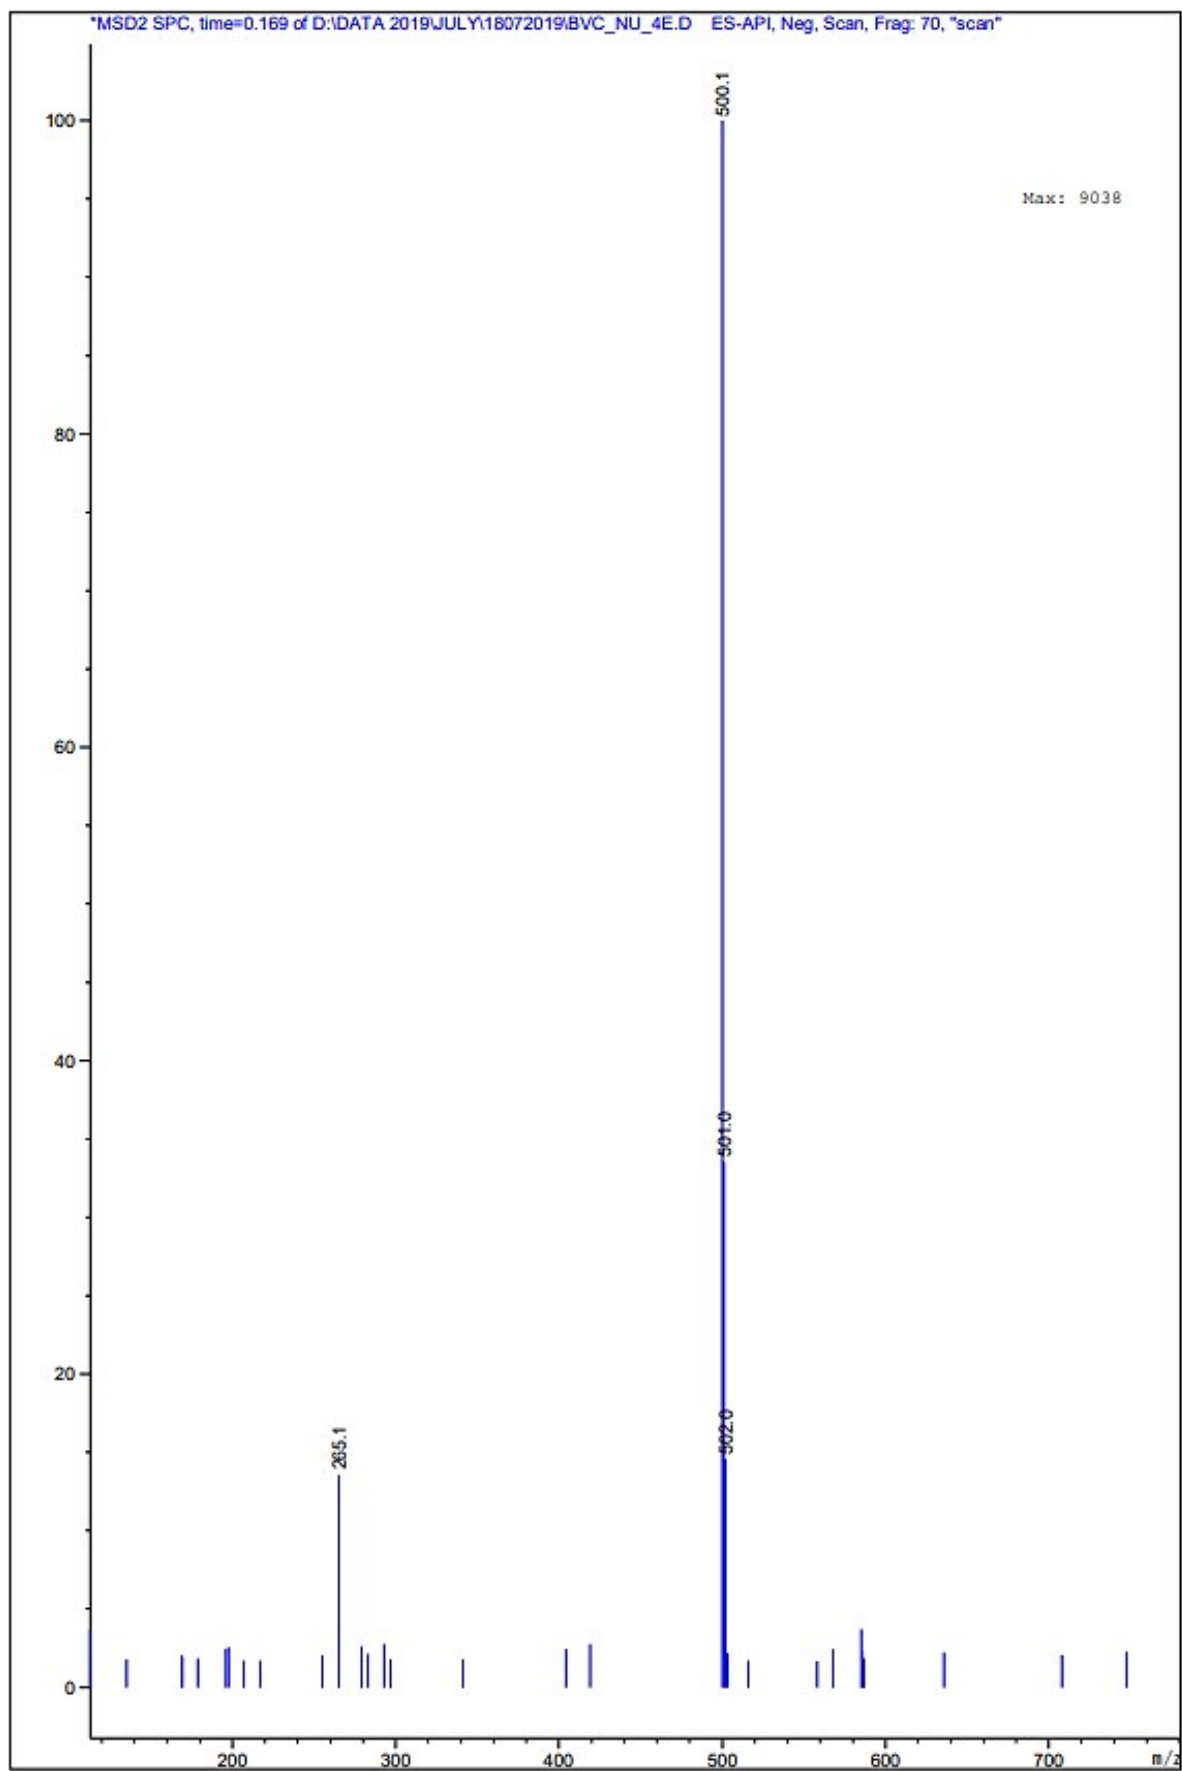



**5-(4-(2-(5-(2,4-difluorophenyl)-3-phenyl-4,5-dihydro-1H-pyrazol-1-yl)-2-oxoethoxy)benzylidene) thiazolidine-2,4-dione (13f).**

**a. FTIR**

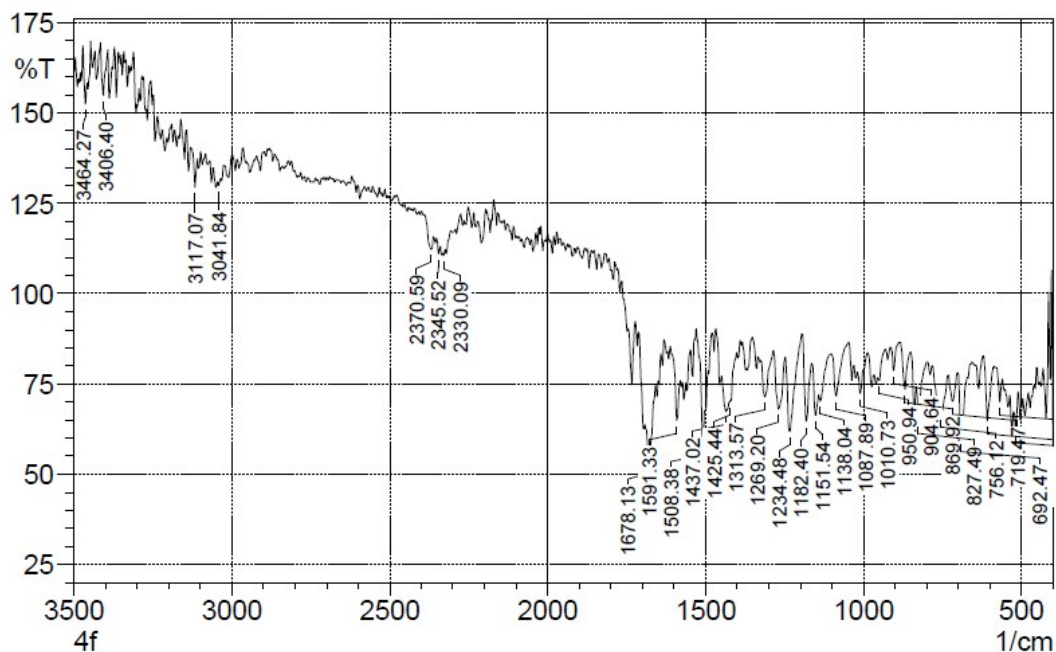

**b. <sup>1</sup>H-NMR**

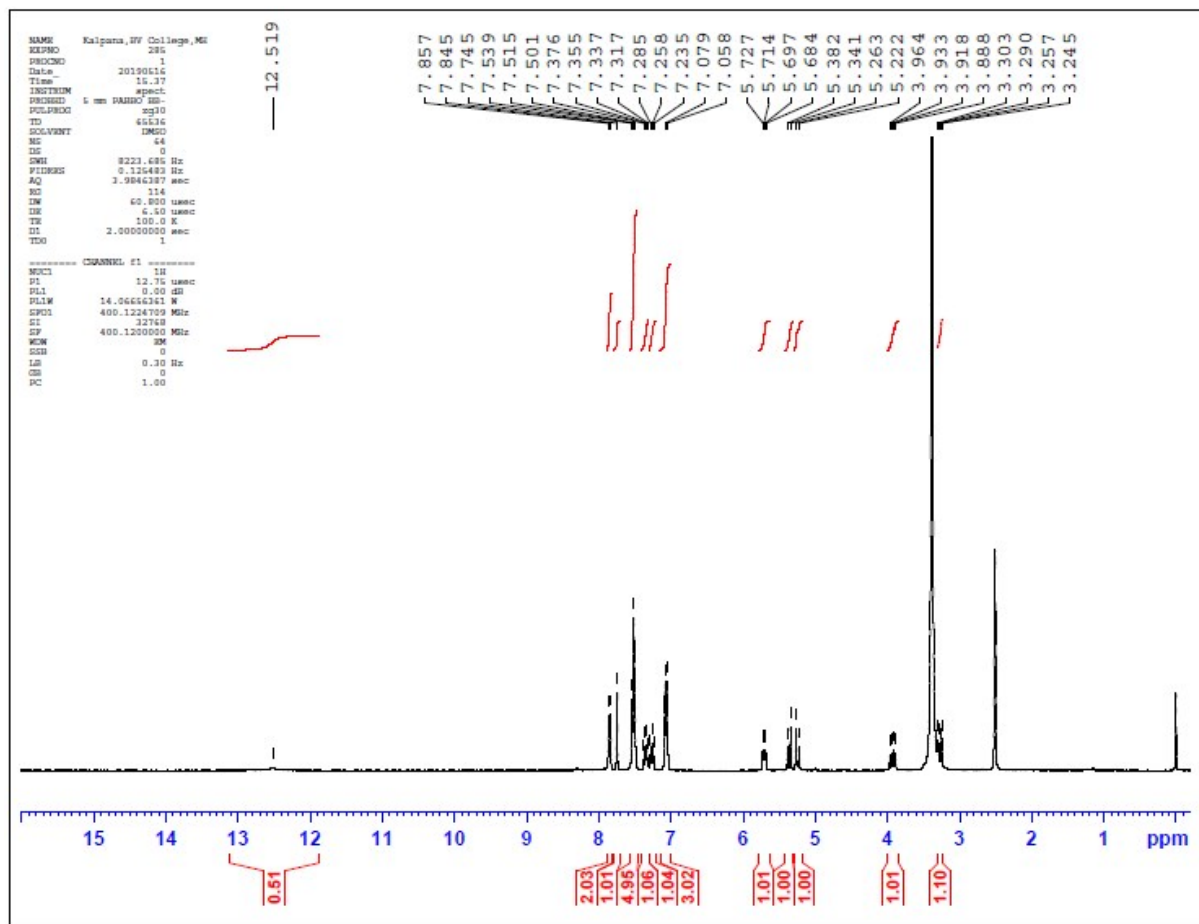

c. <sup>13</sup>C-NMR

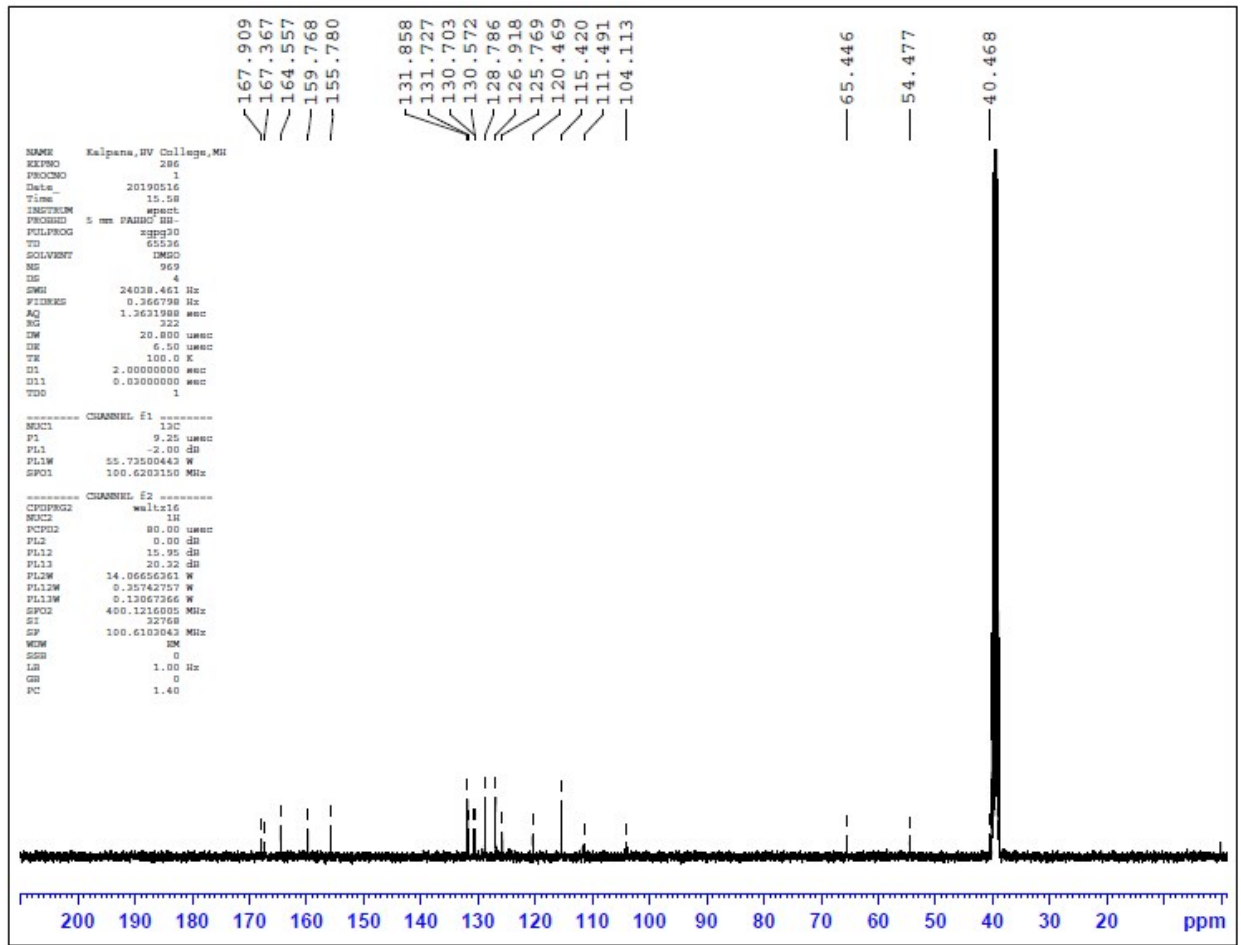

d. HPLC

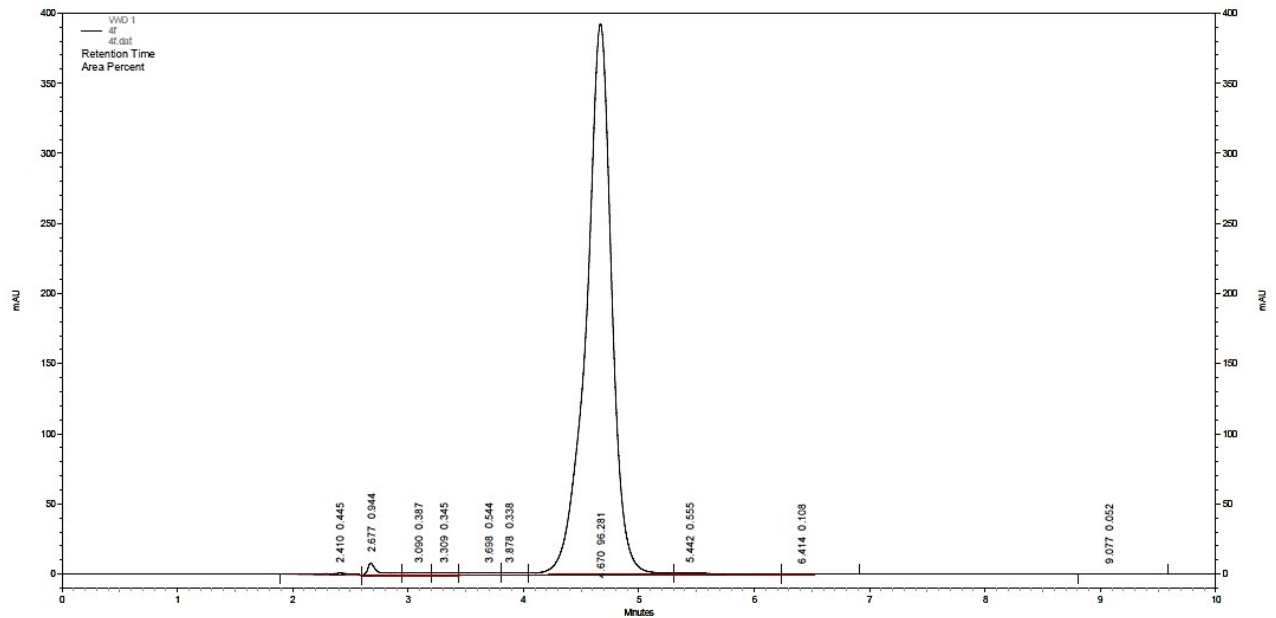

### e. Mass spectroscopy

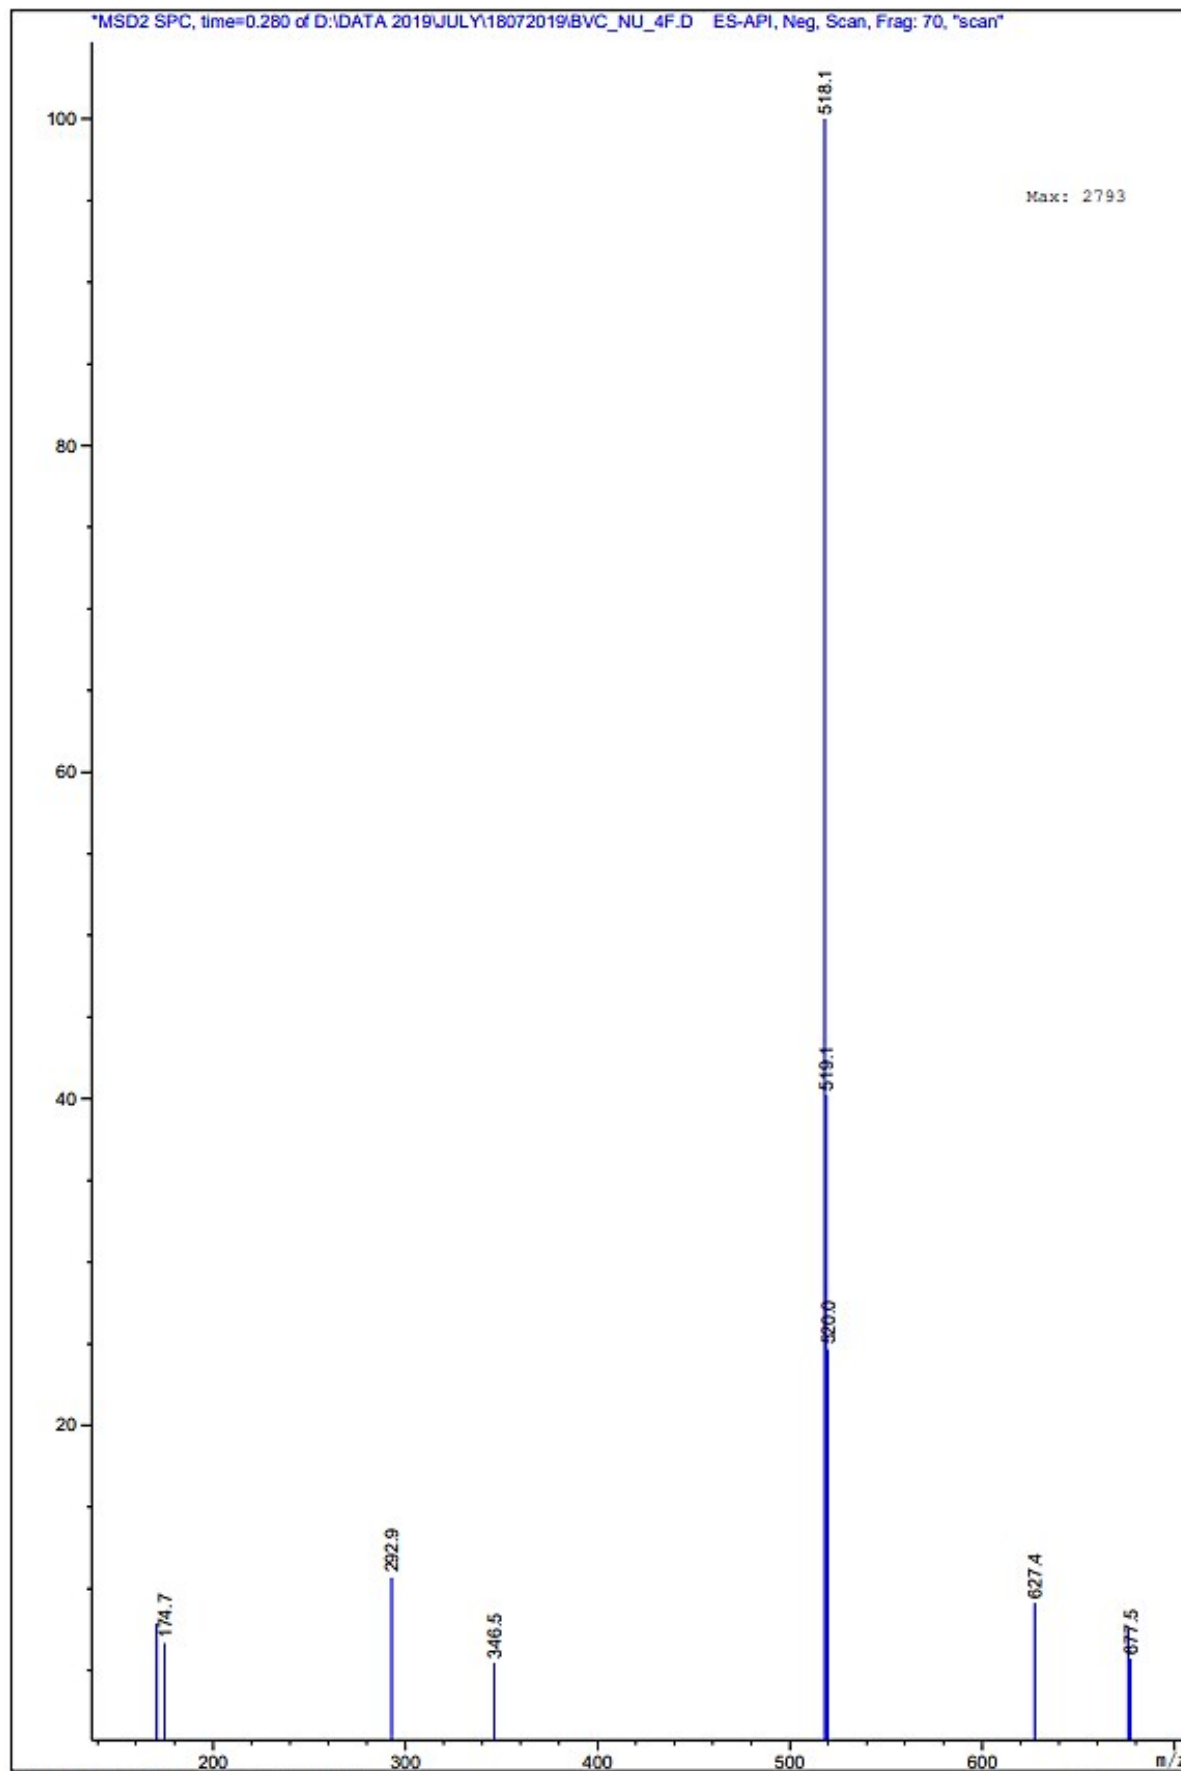

**5-(4-(2-oxo-2-(3-phenyl-5-(p-tolyl)-4,5-dihydro-1H-pyrazol-1-yl)ethoxy)benzylidene)thiazolidine-2,4-dione (13g).**

**a. FTIR**

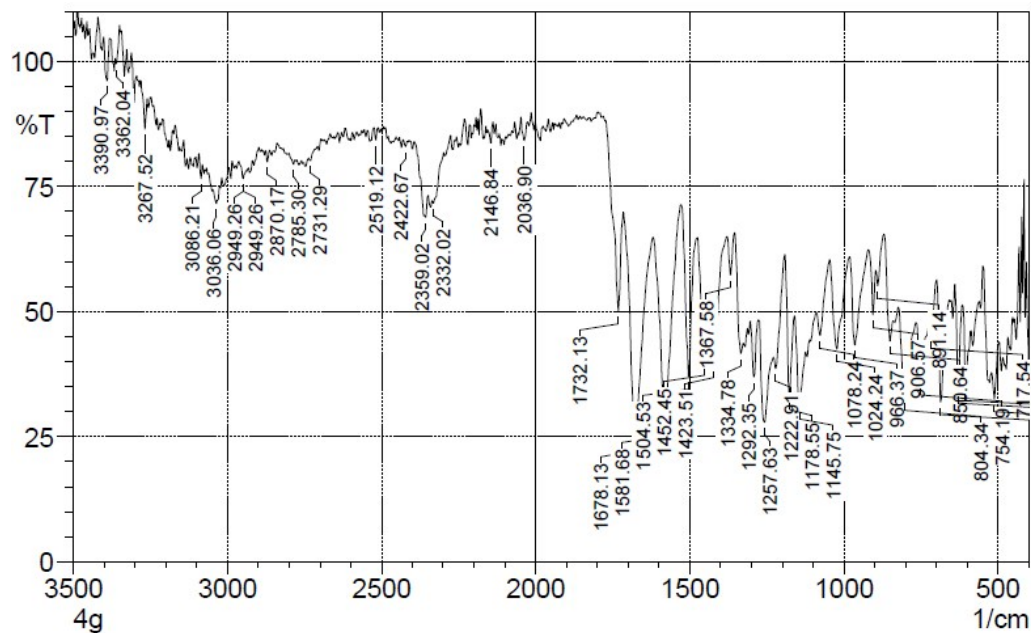

**b. <sup>1</sup>H-NMR**

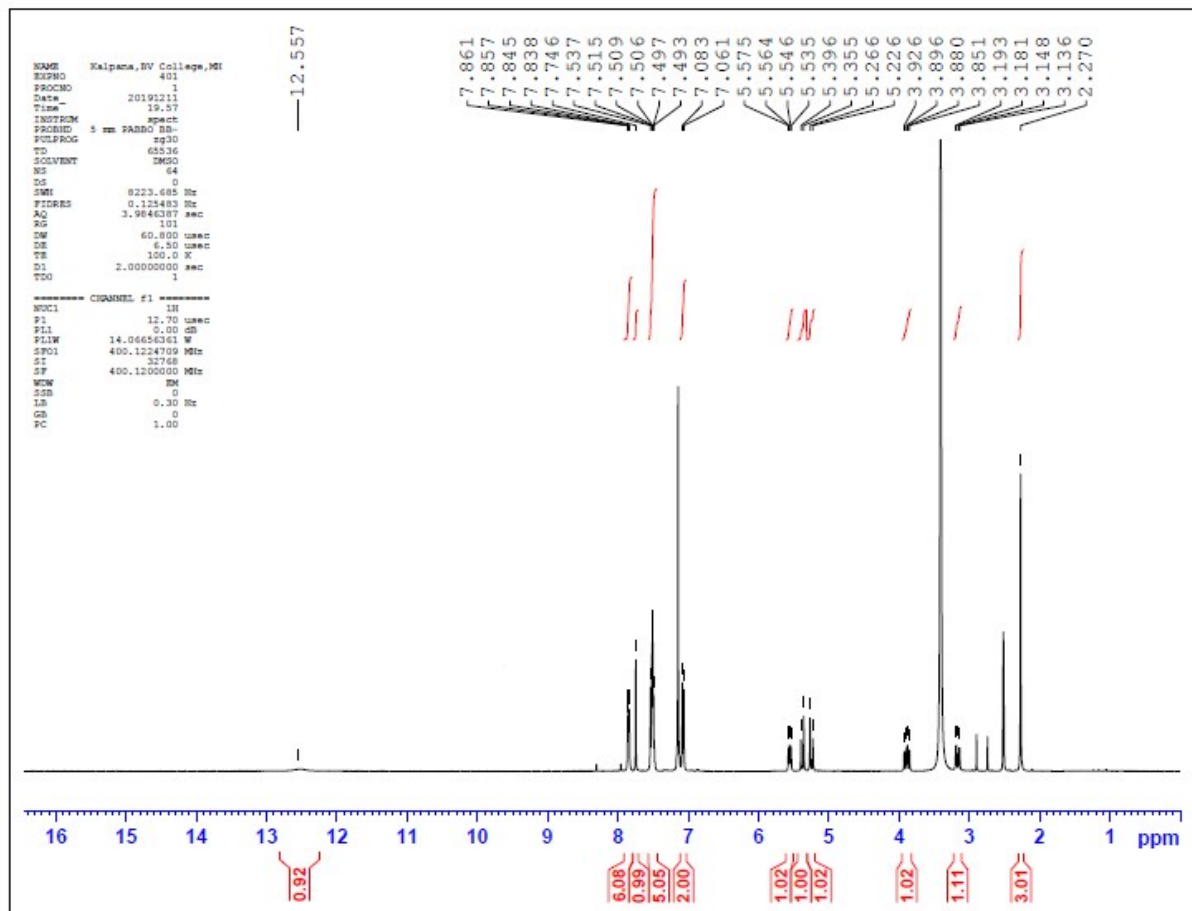

c. <sup>13</sup>C-NMR

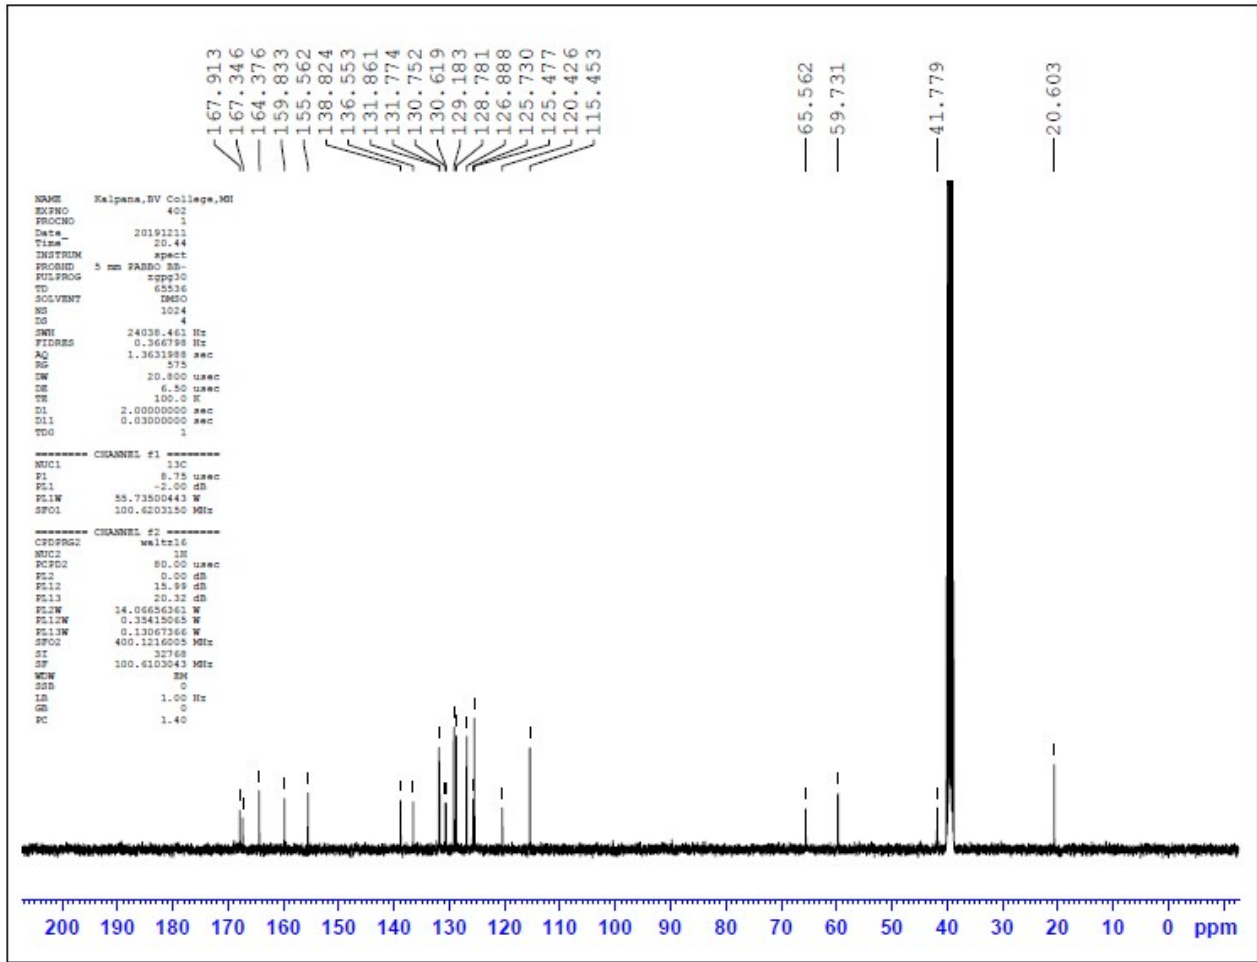

d. HPLC

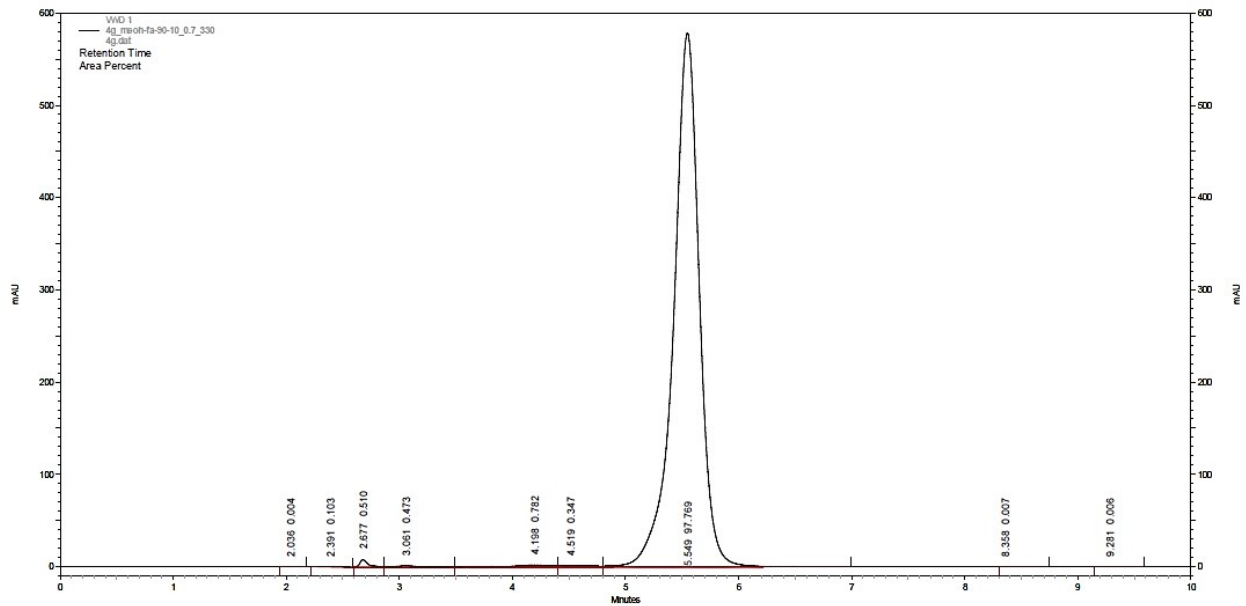

### e. Mass spectroscopy

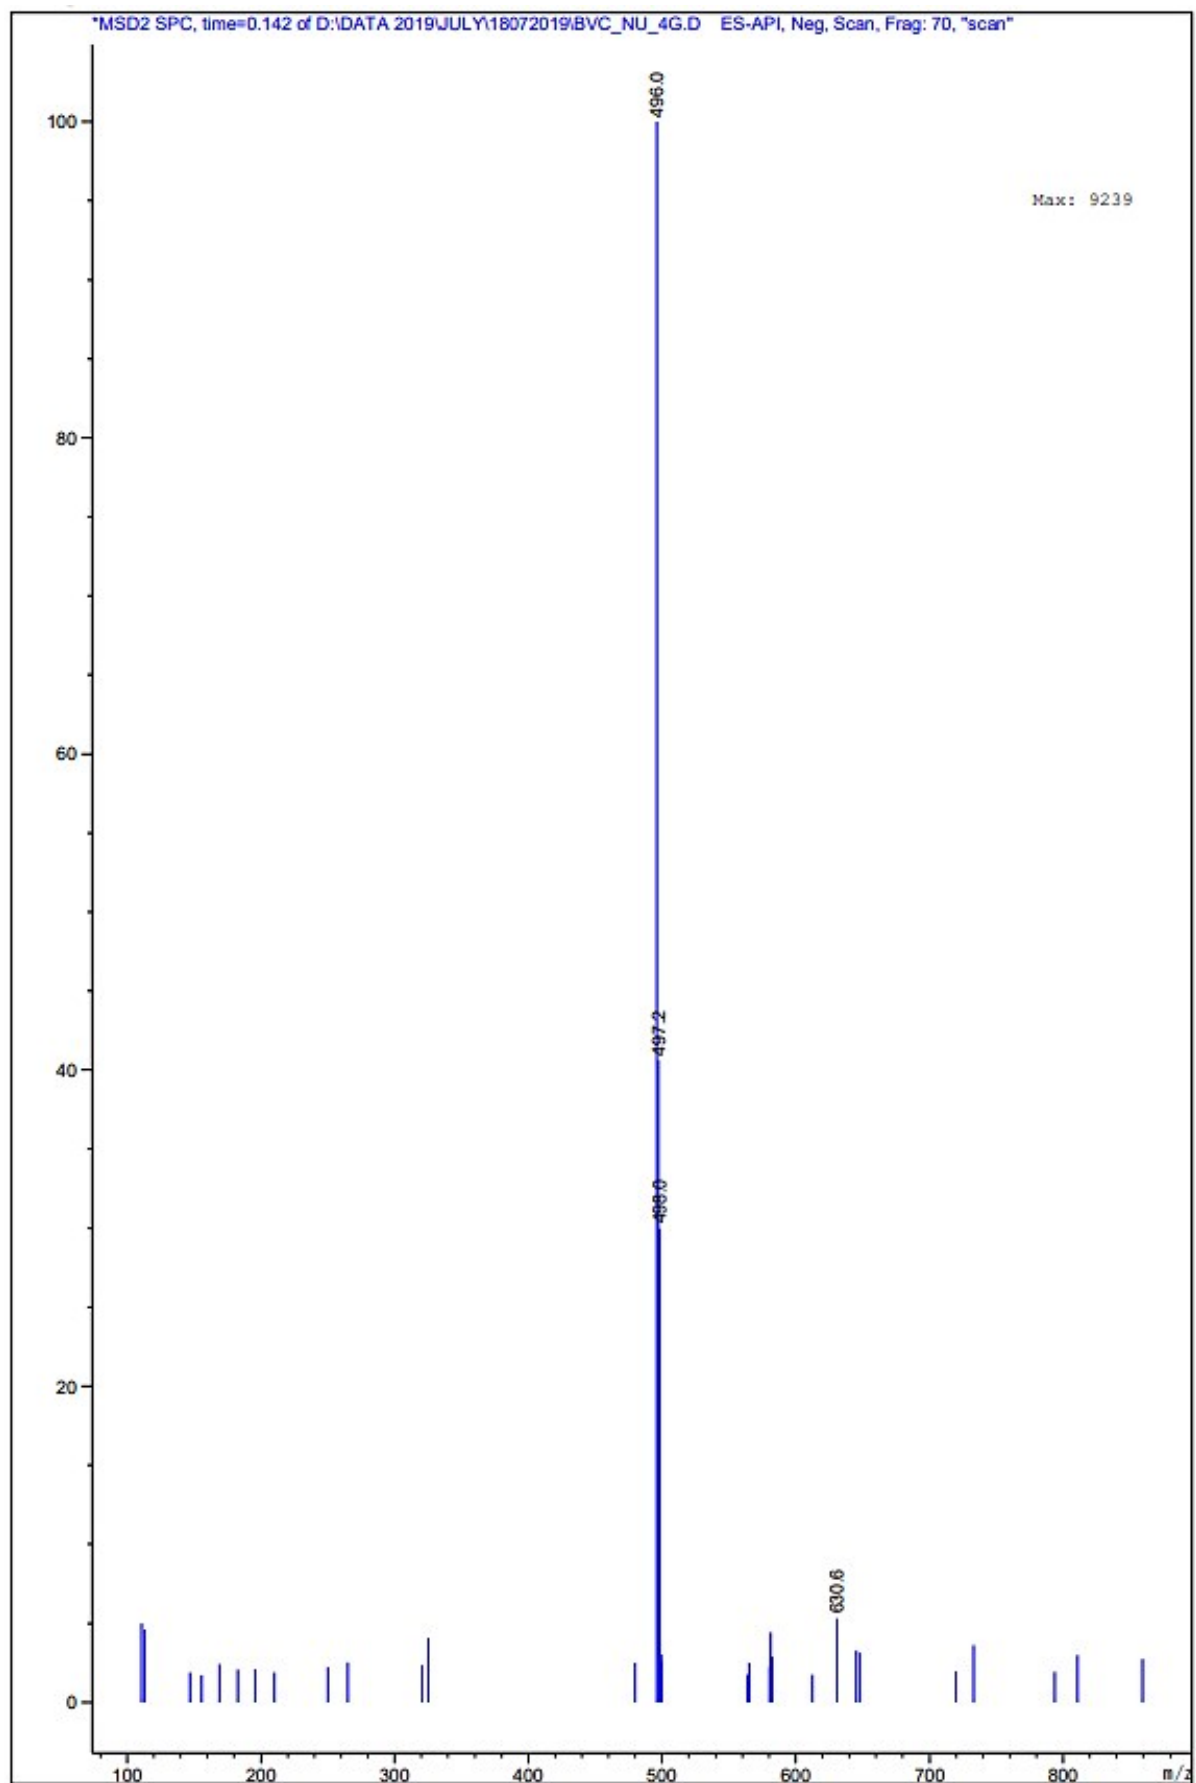

**5-(4-(2-(5-(3,4-dichlorophenyl)-3-phenyl-4,5-dihydro-1H-pyrazol-1-yl)-2-oxoethoxy)benzylidene)thiazolidine-2,4-dione (13j).**

**a. FTIR**

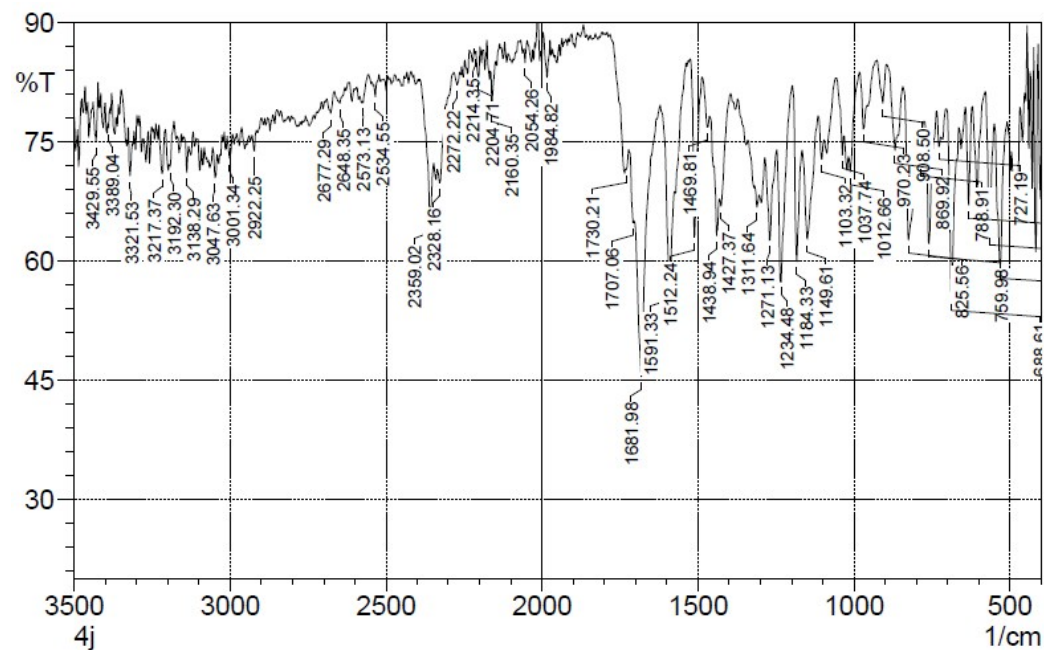

**b. <sup>1</sup>H-NMR**

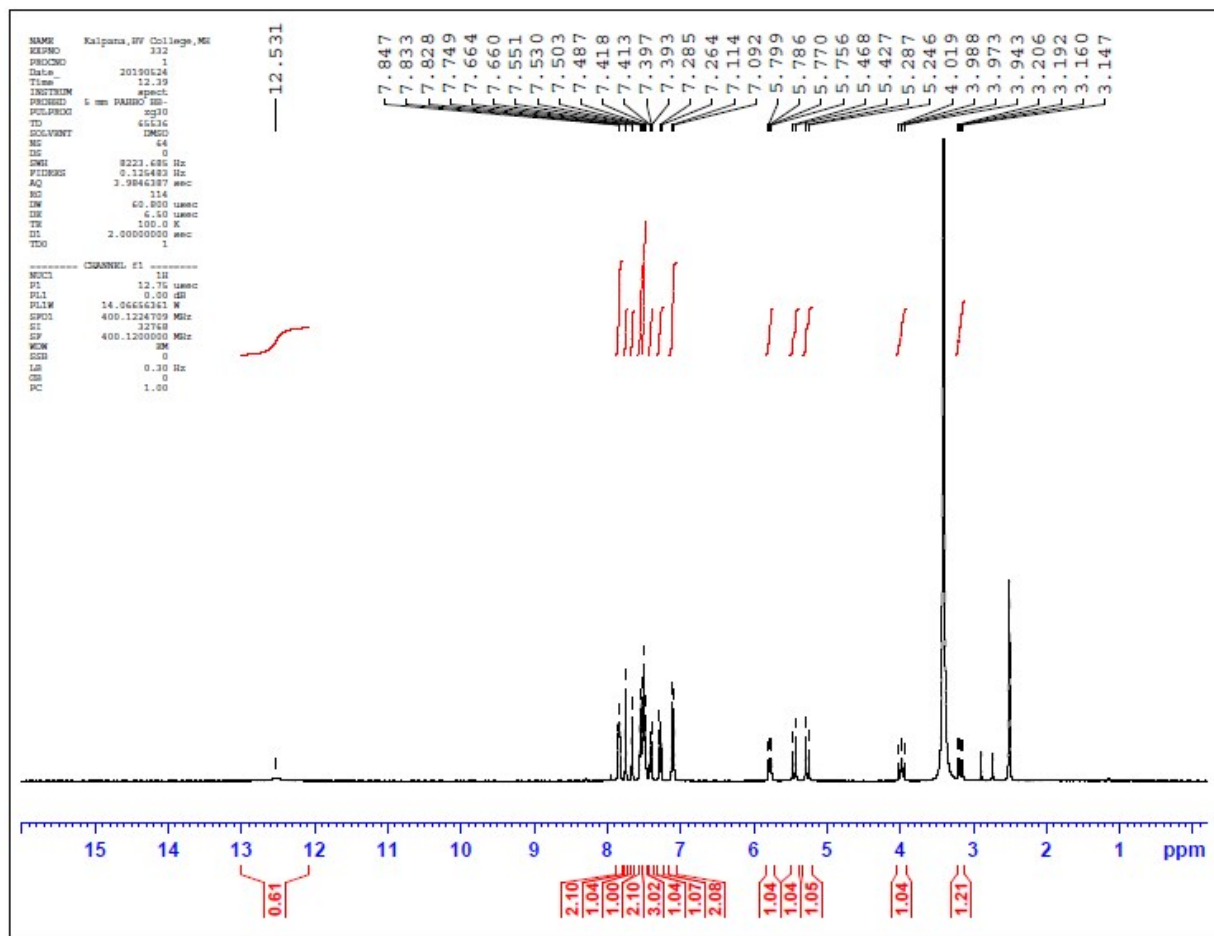

c. <sup>13</sup>C-NMR

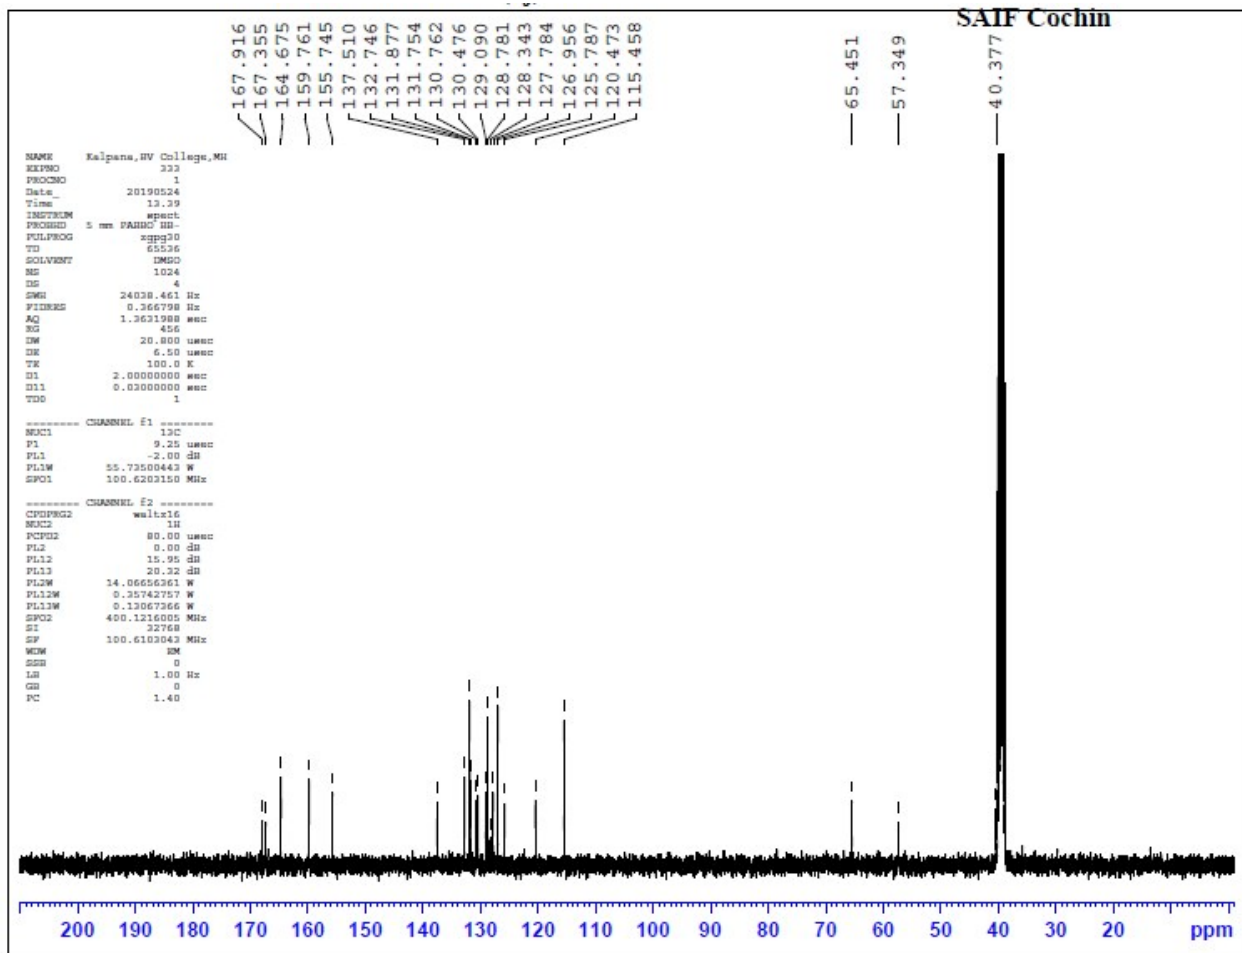

d. HPLC

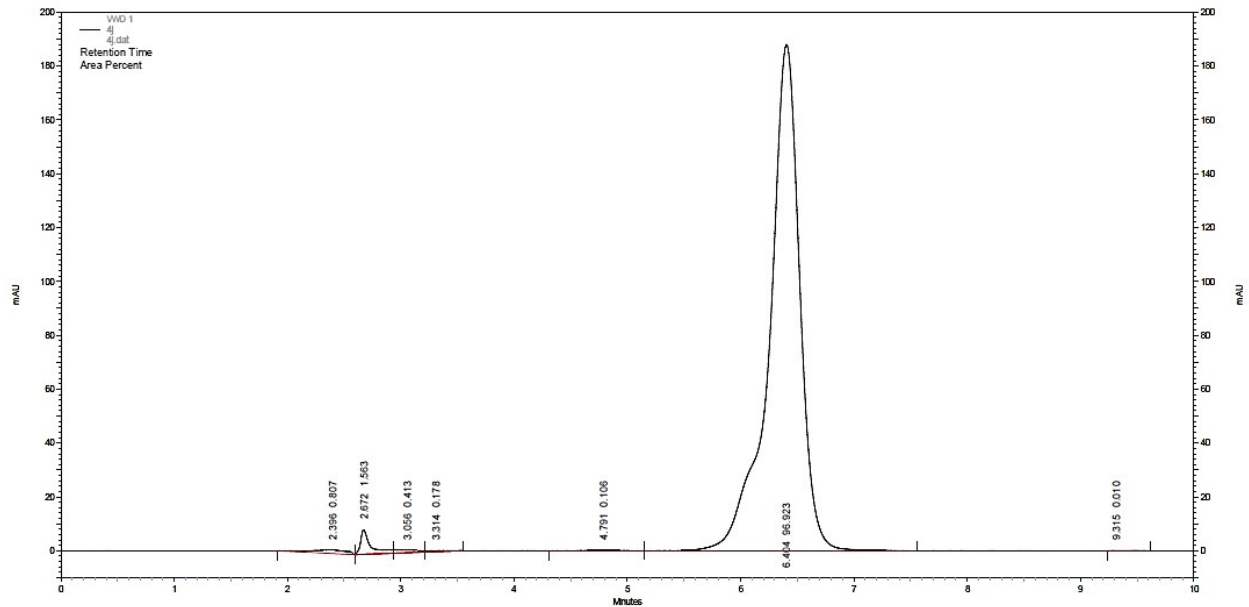



### e. Mass spectroscopy

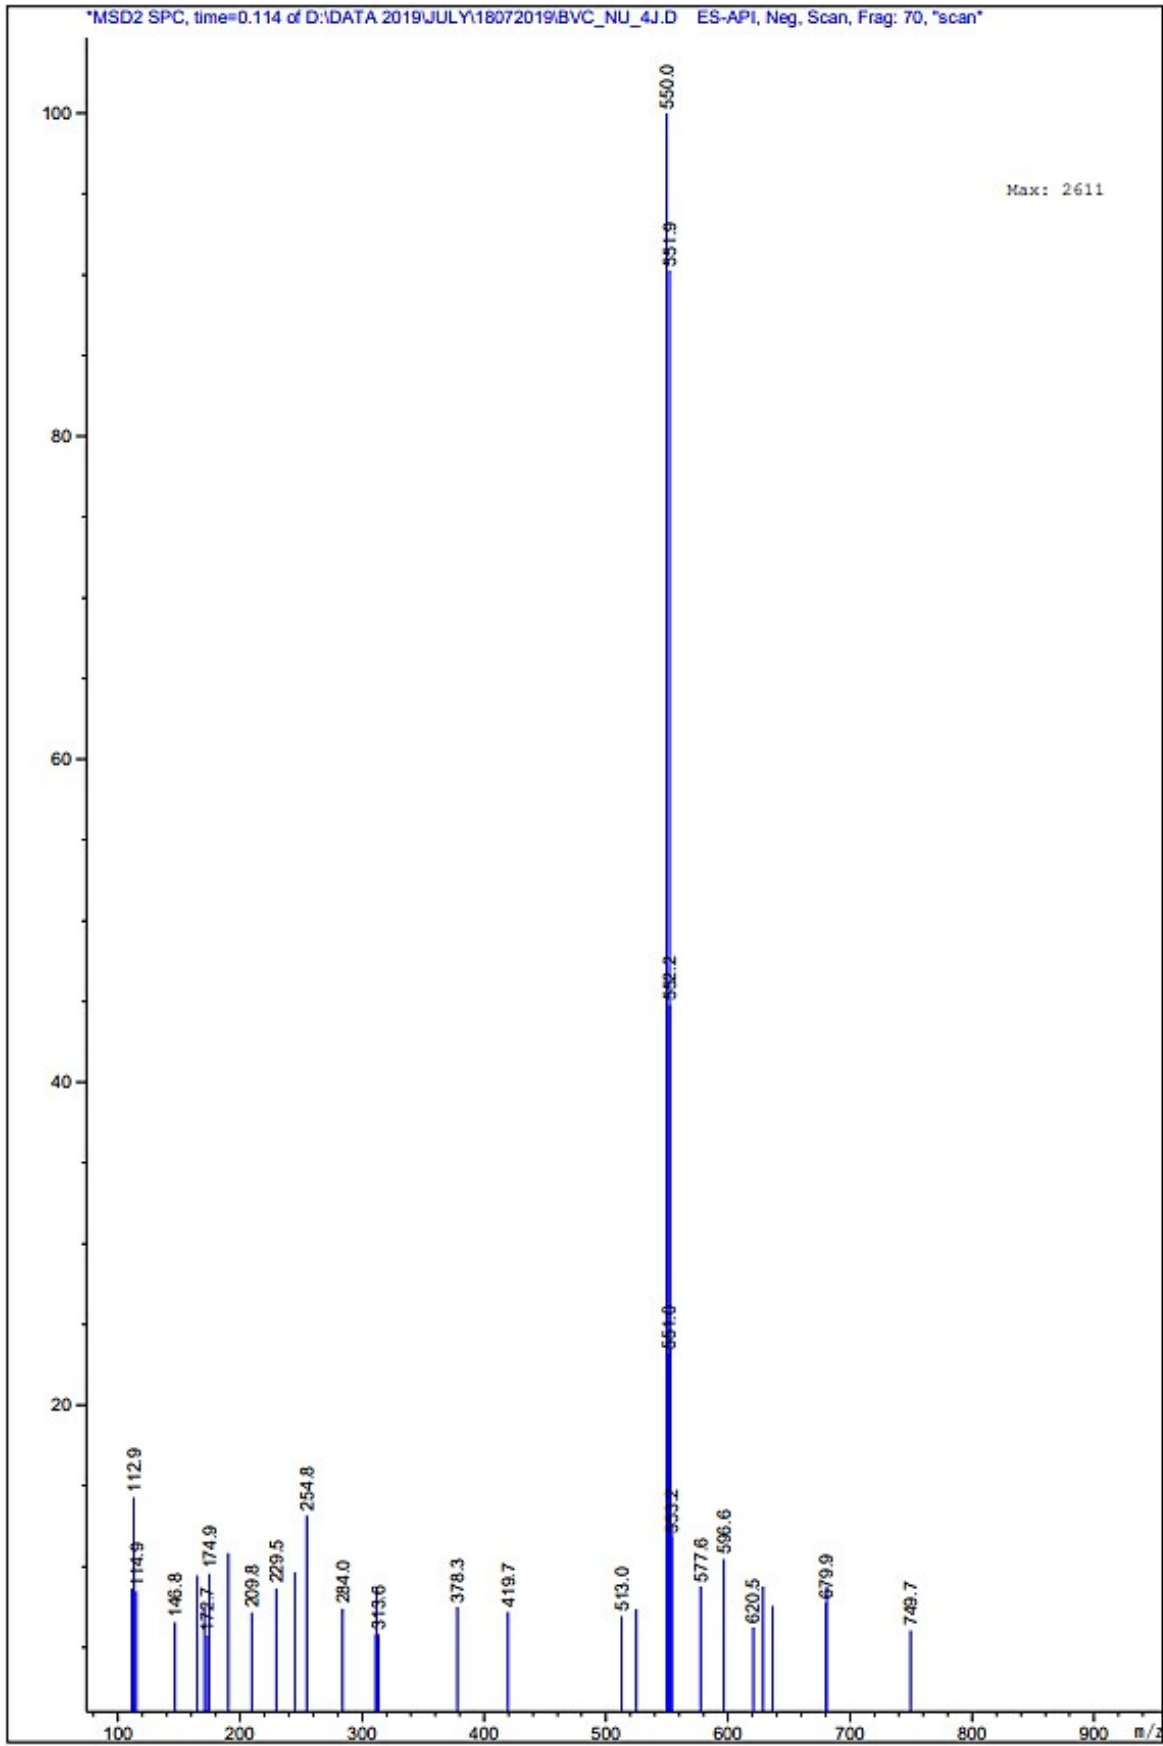

**5-(4-(2-(5-(4-bromophenyl)-3-phenyl-4,5-dihydro-1H-pyrazol-1-yl)-2-oxoethoxy)benzylidene)thiazolidine-2,4-dione (13k).**

**a. FTIR**

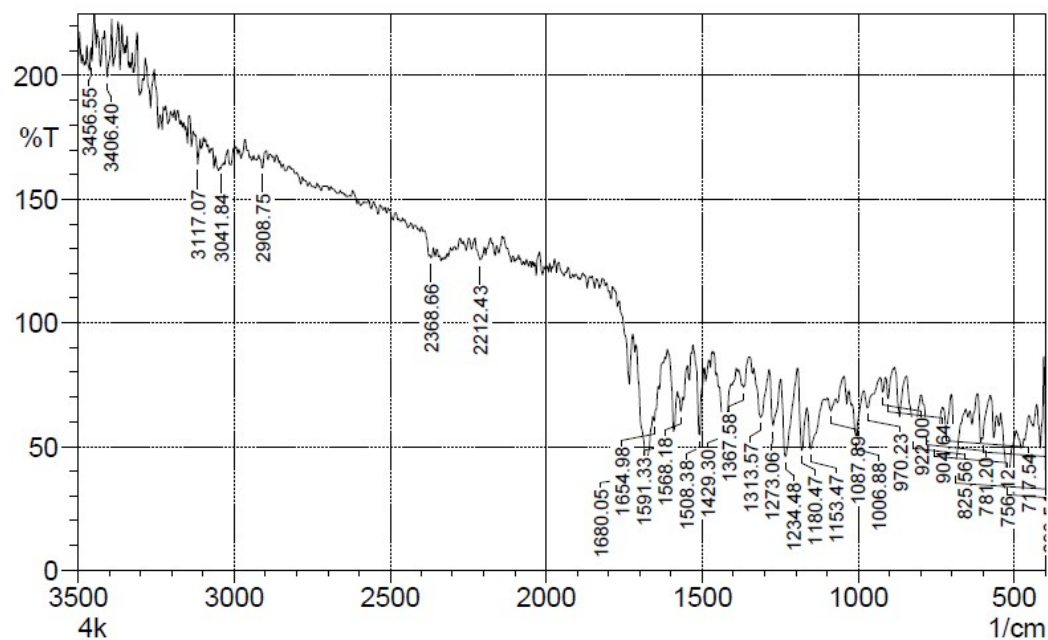

**b. <sup>1</sup>H-NMR**

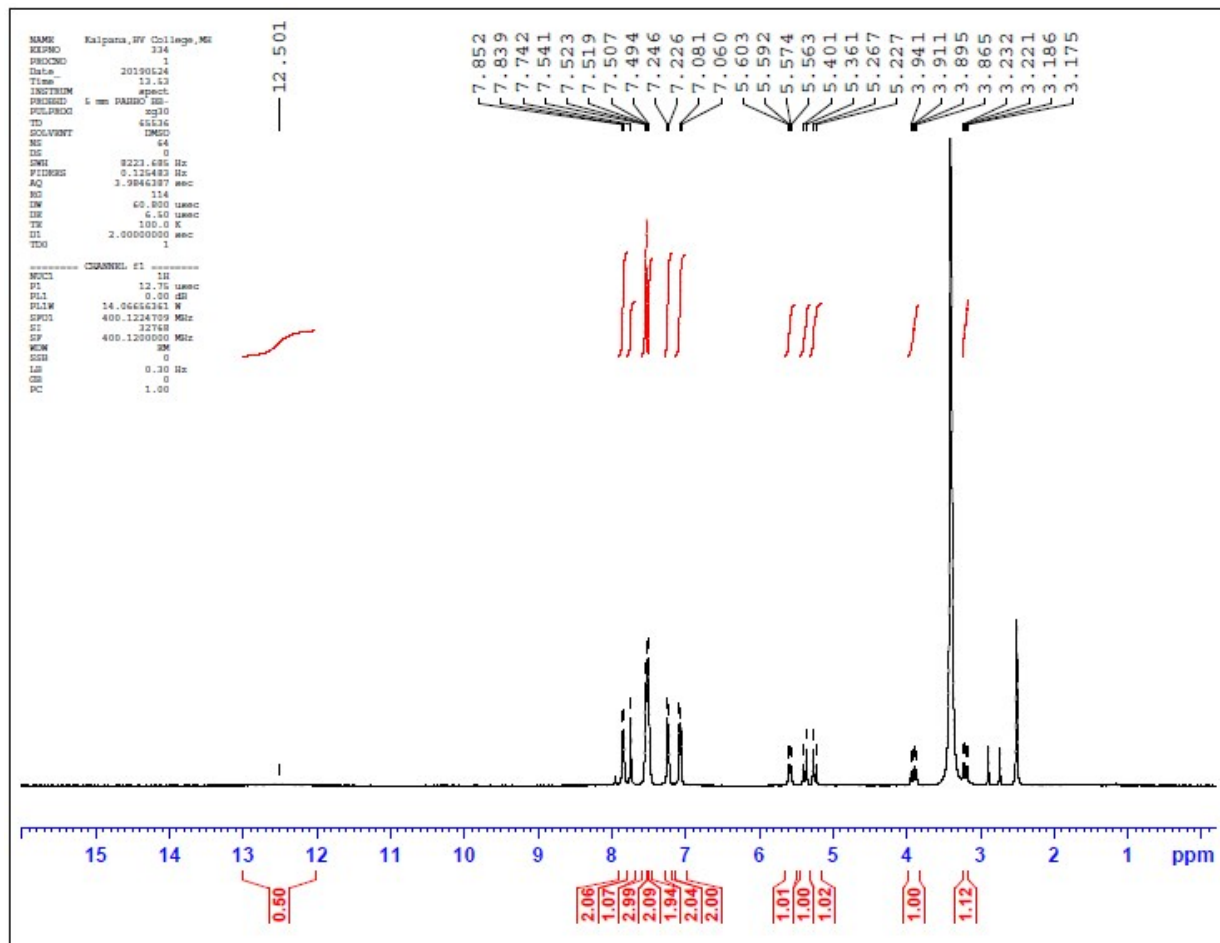

c. <sup>13</sup>C-NMR

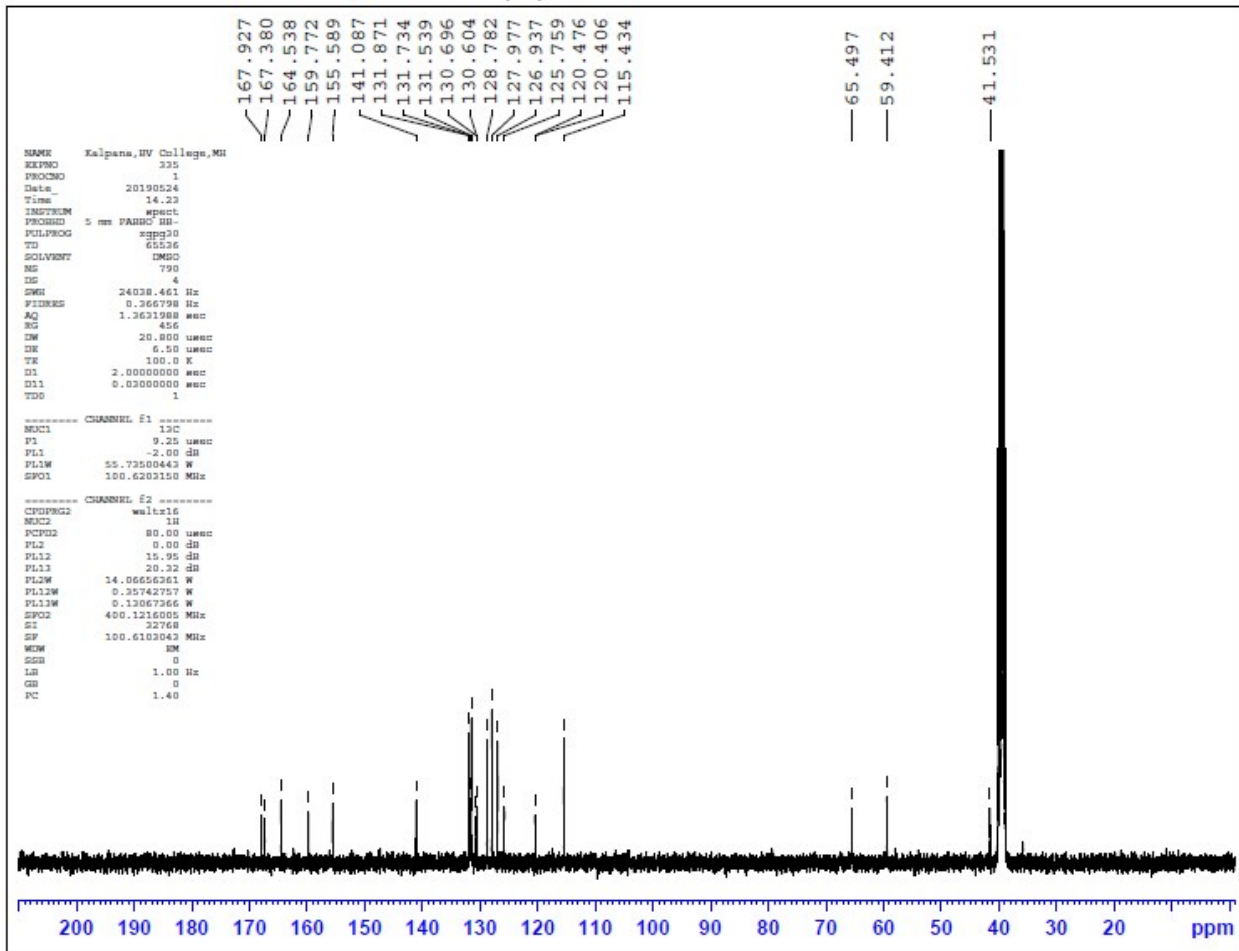

d. HPLC

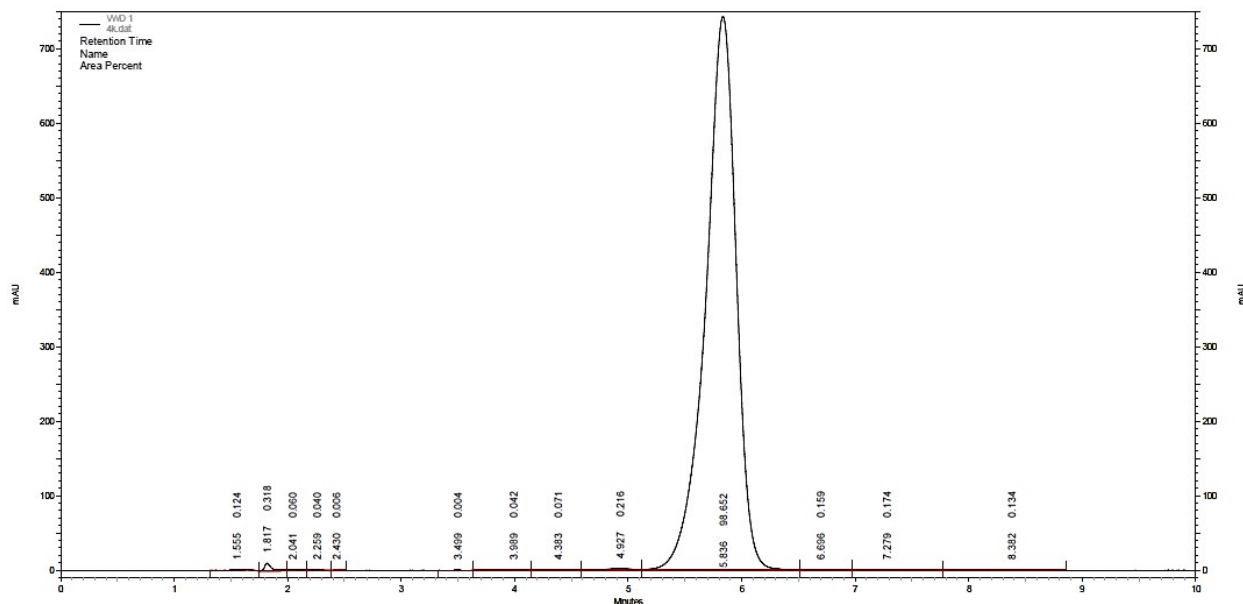

## e. Mass spectroscopy

MS Spectrum

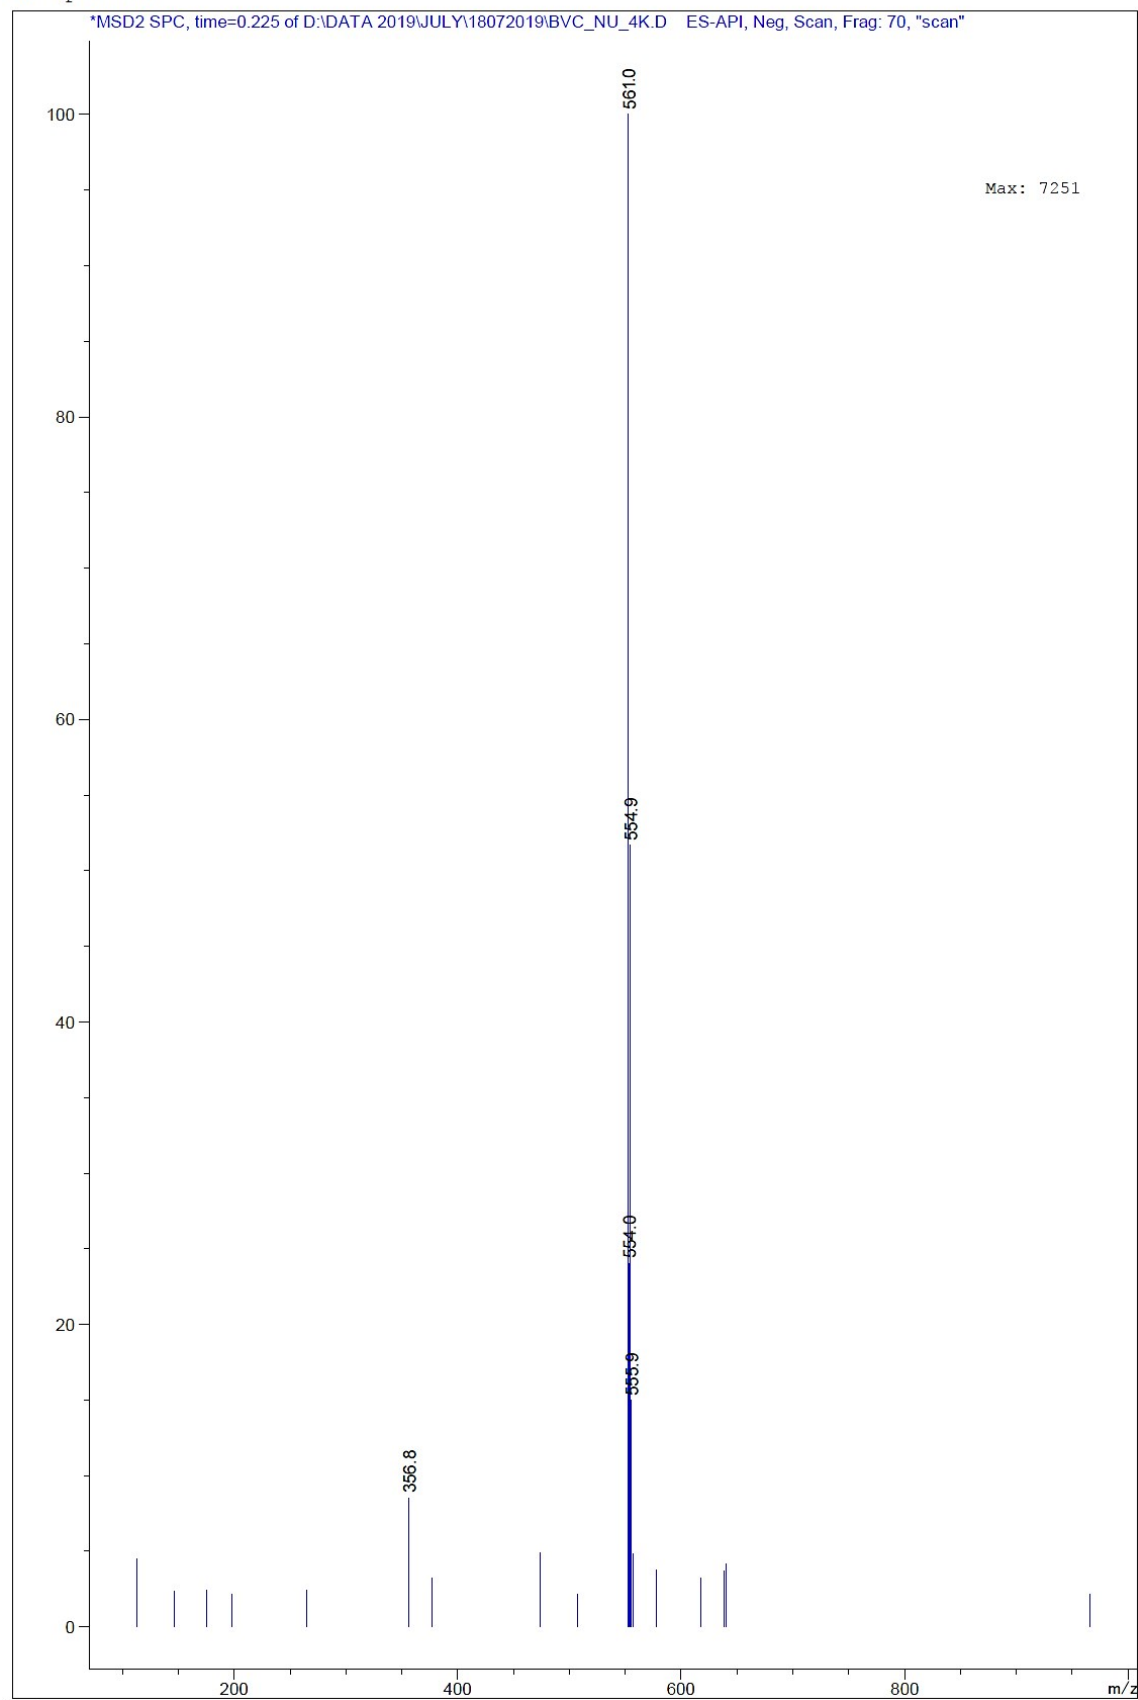

**5-(4-(2-(3-(4-fluorophenyl)-5-phenyl-4,5-dihydro-1H-pyrazol-1-yl)-2-oxoethoxy)benzylidene)thiazolidine-2,4-dione (14a).**

**a. FTIR**

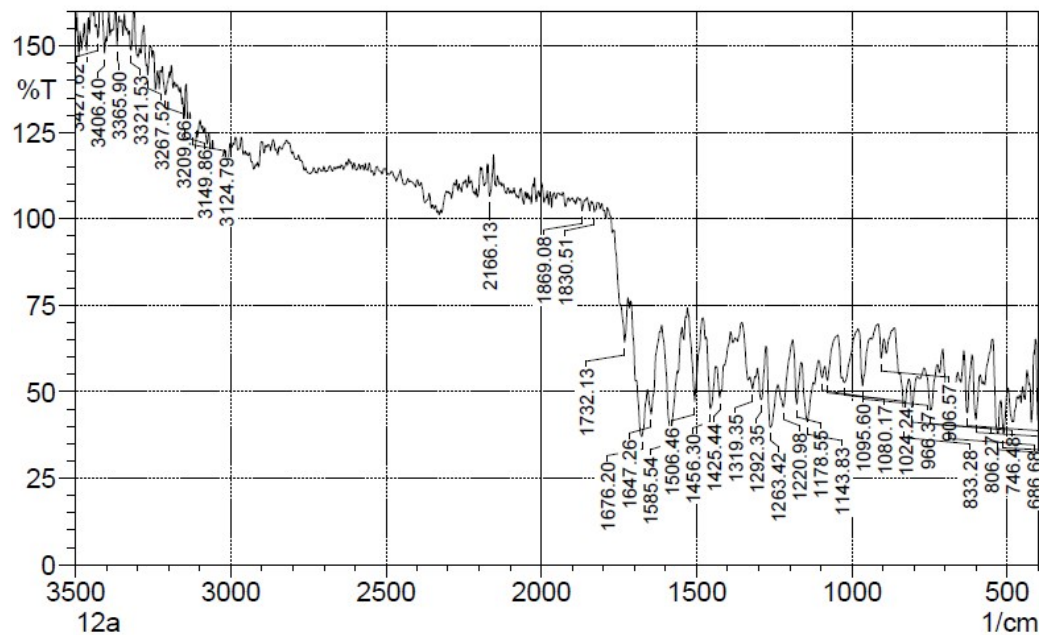

**b. <sup>1</sup>H-NMR**

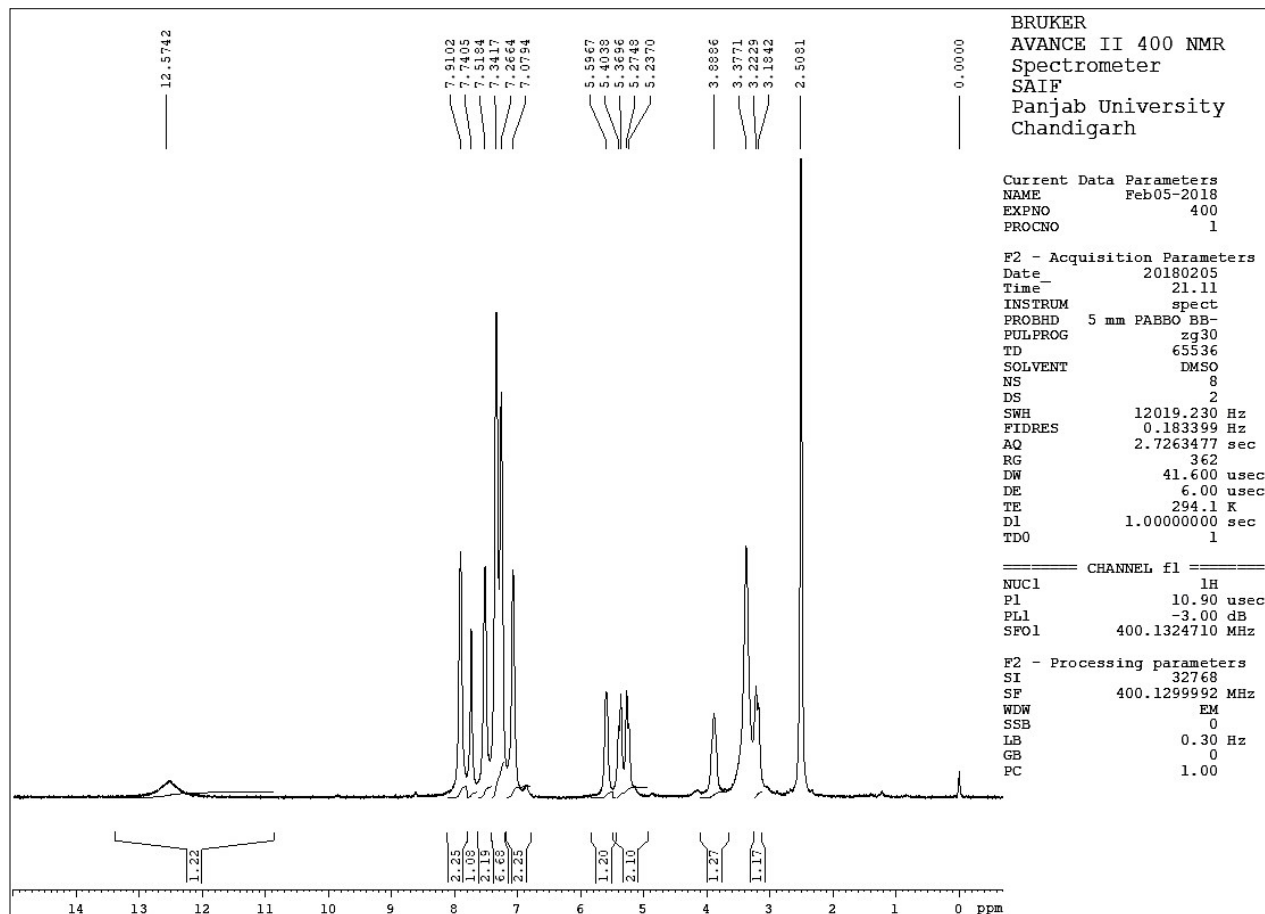

c. <sup>13</sup>C-NMR

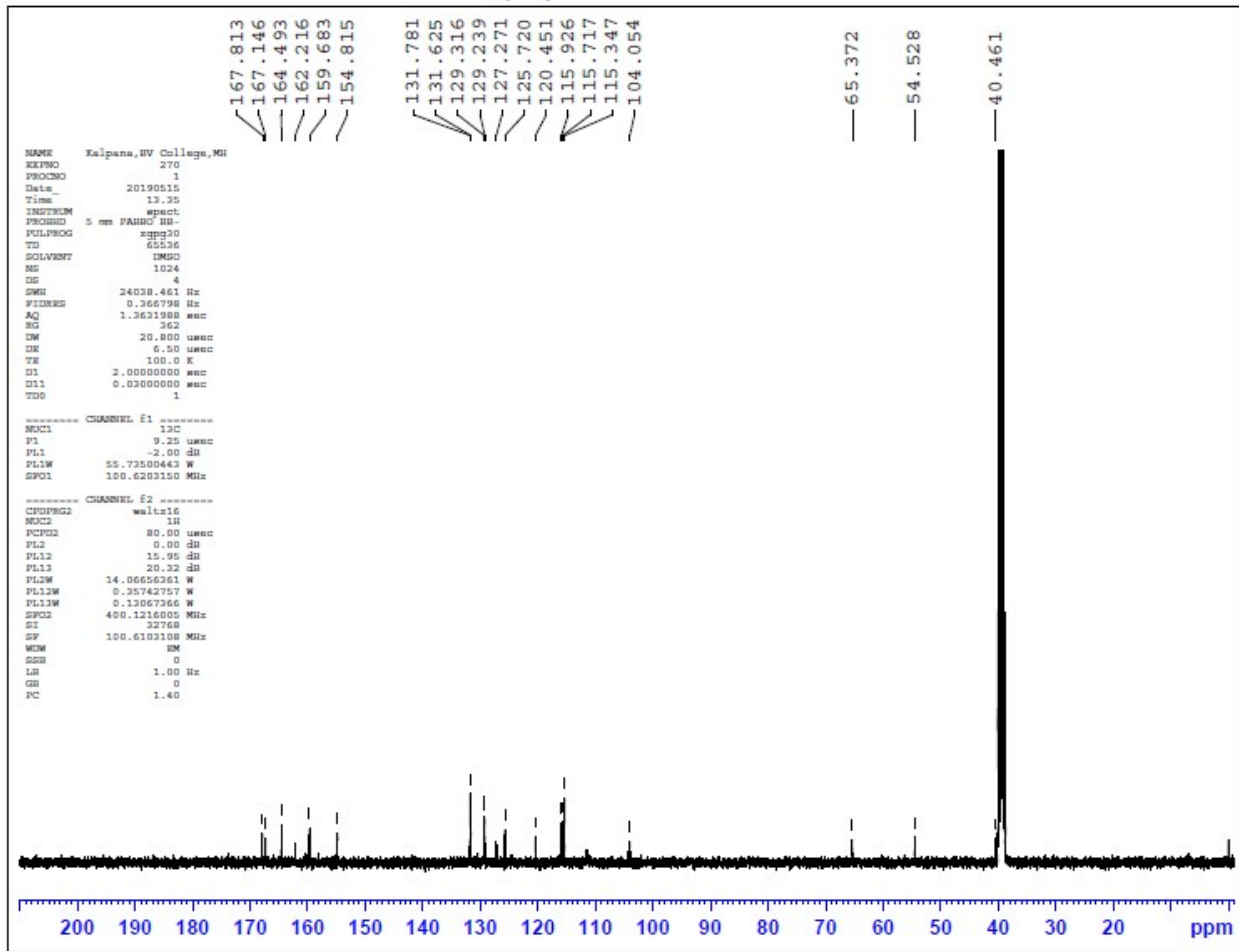

d. HPLC

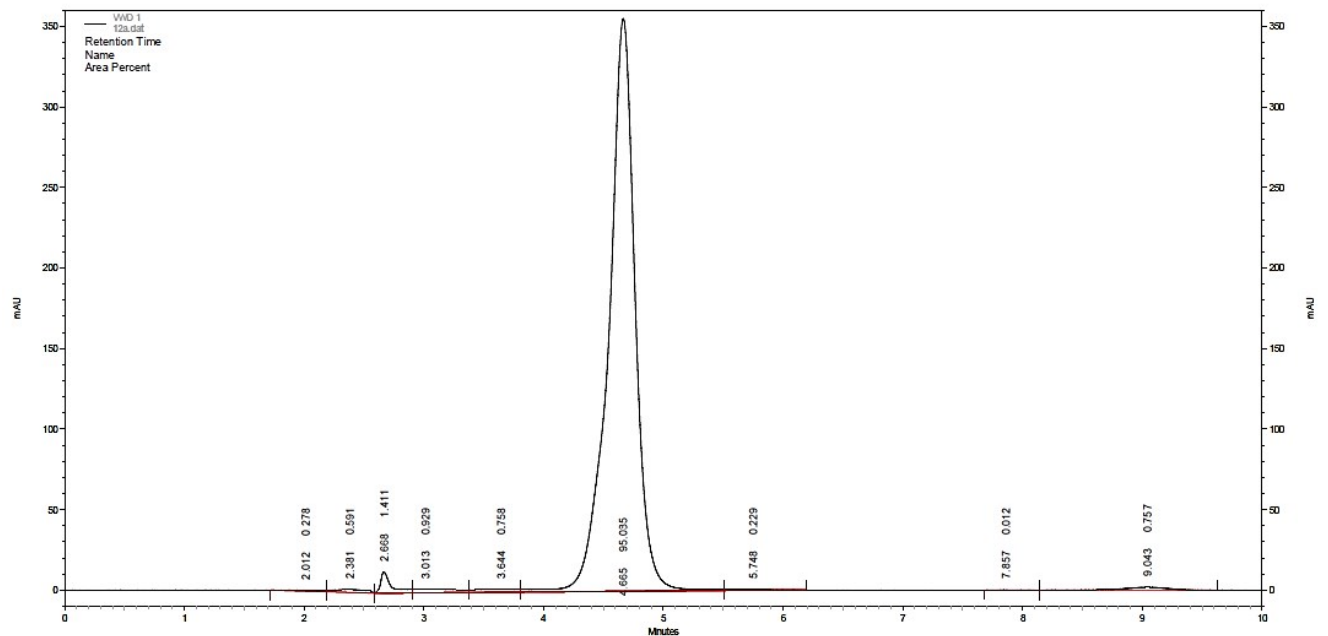

### e. Mass spectroscopy

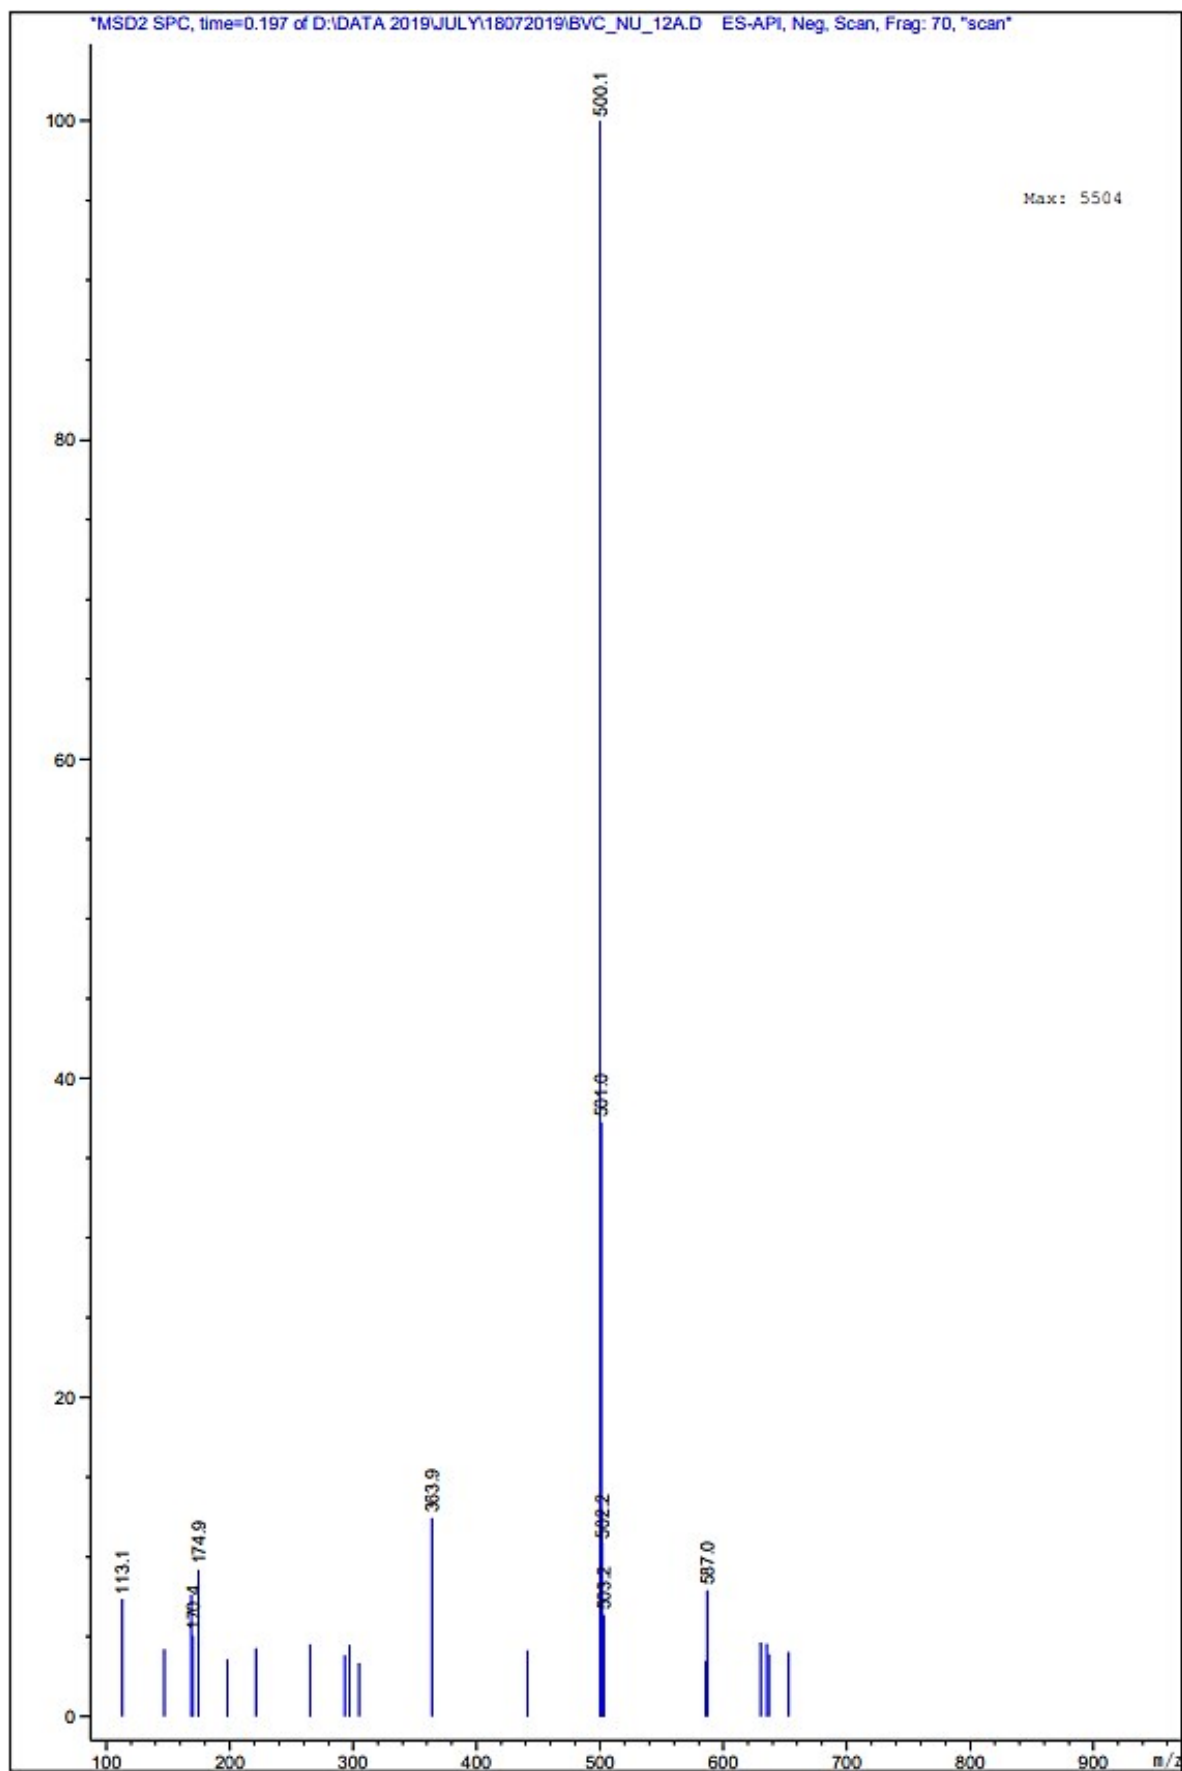

**5-(4-(2-(5-(2-chlorophenyl)-3-(4-fluorophenyl)-4,5-dihydro-1H-pyrazol-1-yl)-2-oxoethoxy)benzylidene)thiazolidine-2,4-dione (14b).**

**a. FTIR**

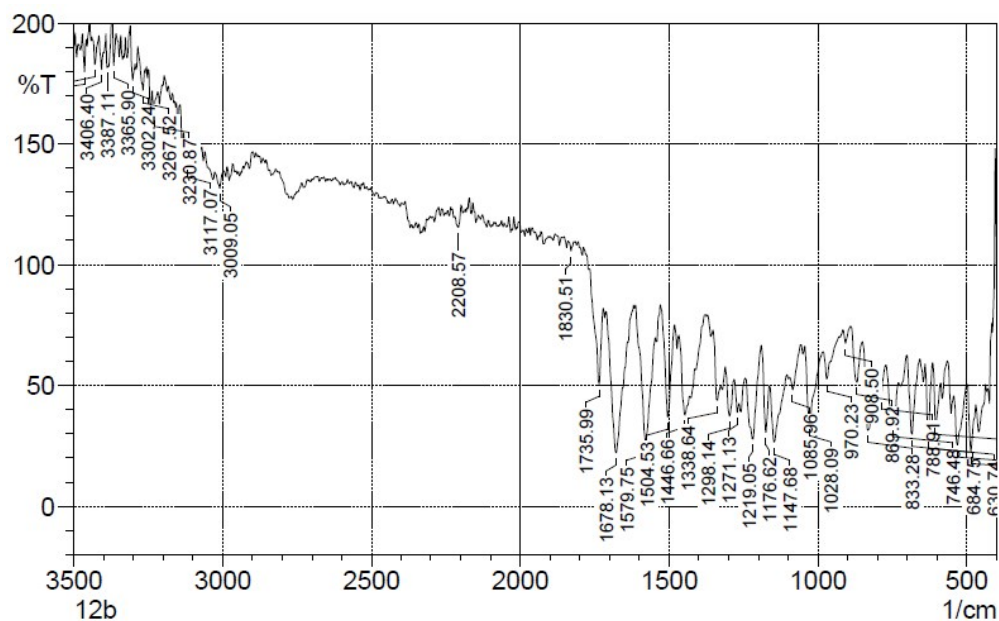

**b. <sup>1</sup>H-NMR**

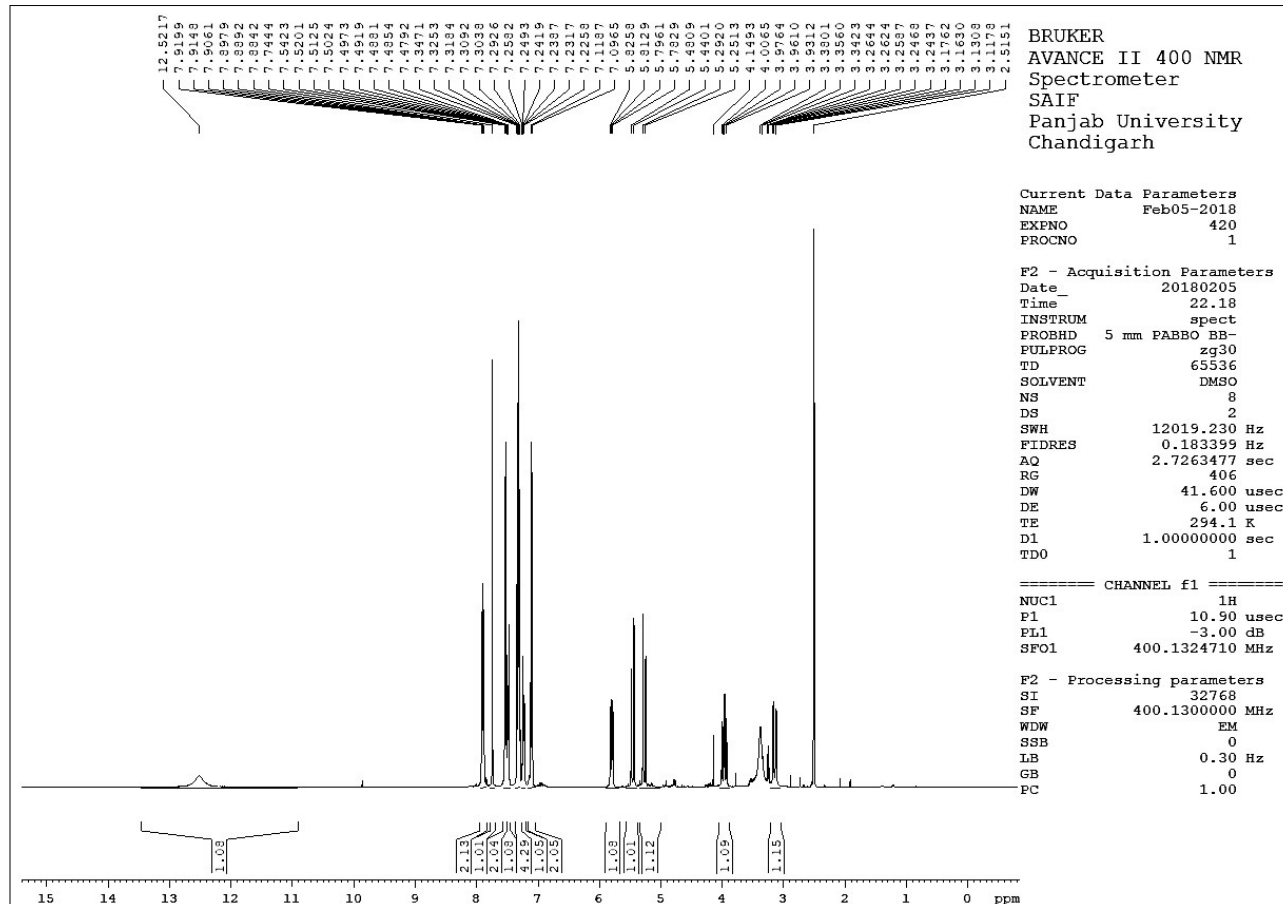



c. <sup>13</sup>C-NMR

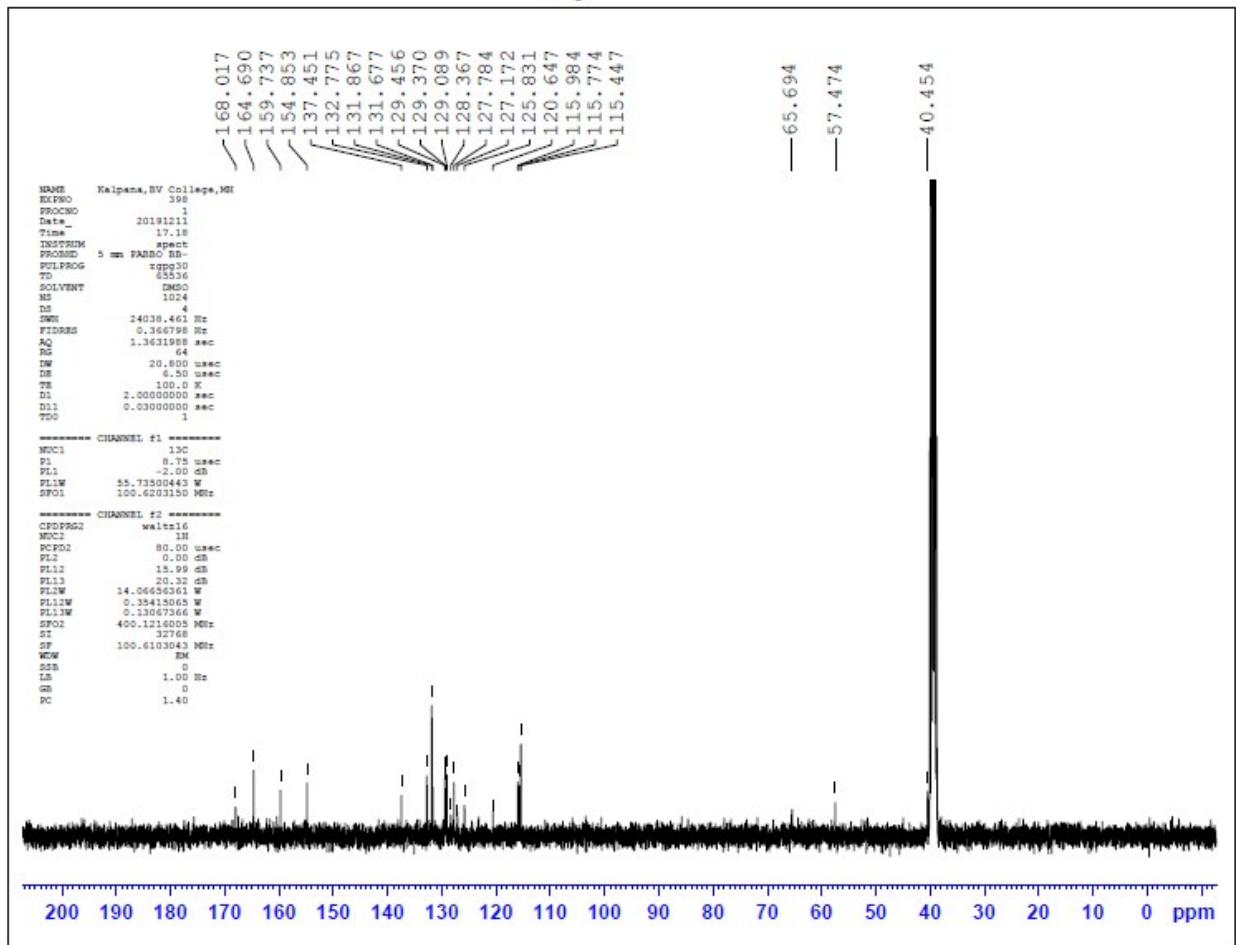

d. HPLC

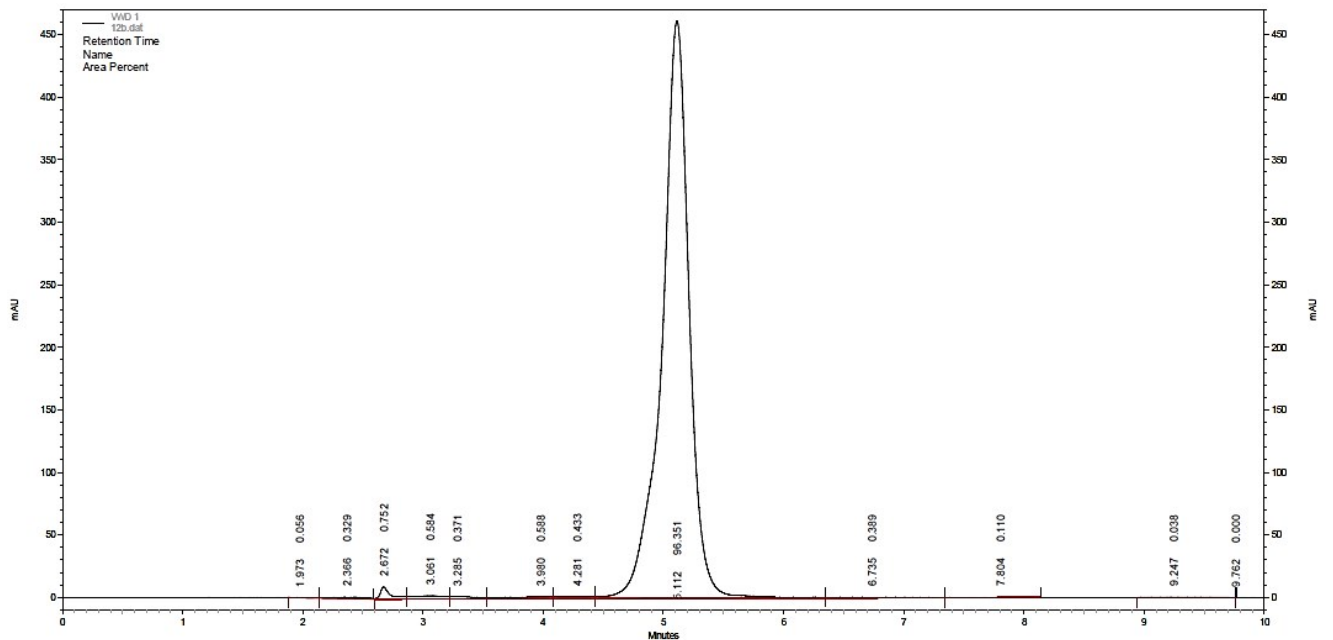

### e. Mass spectroscopy

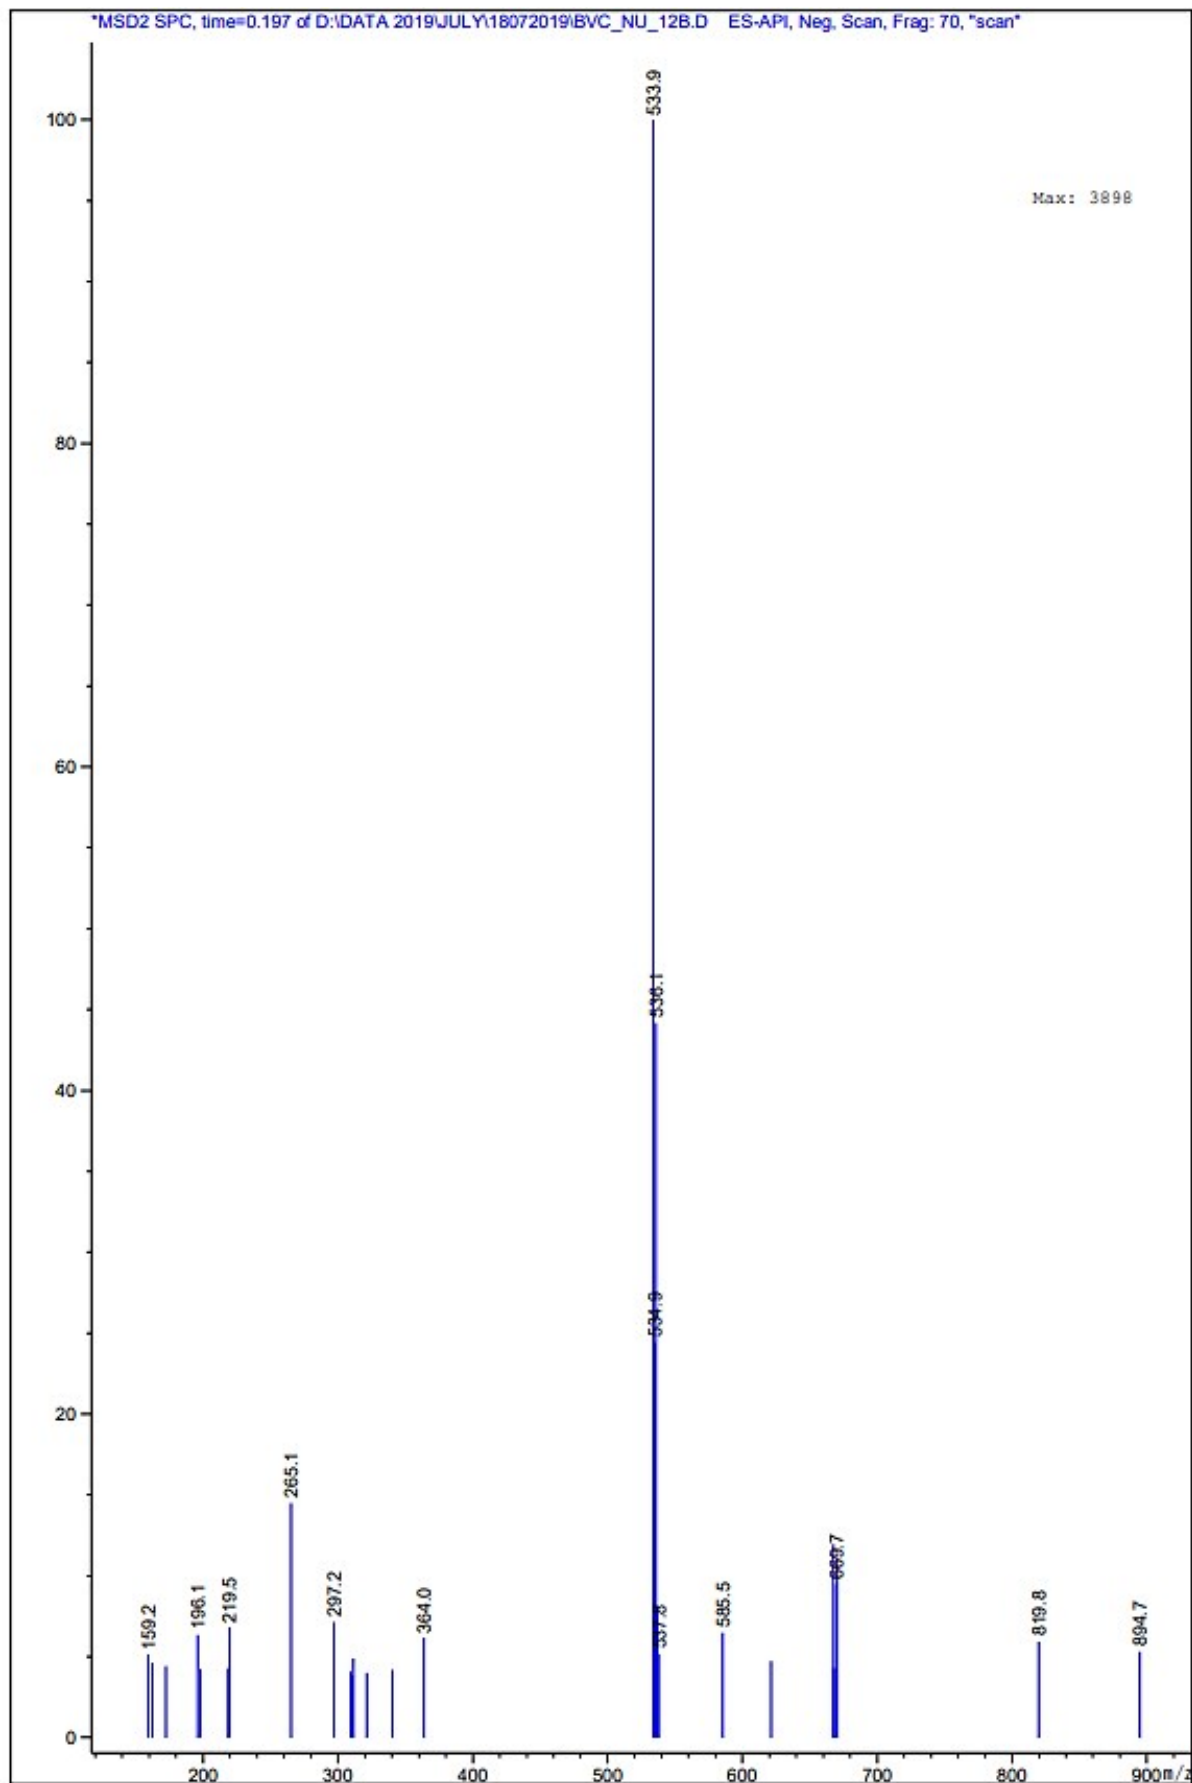

**5-(4-(2-(3-(4-fluorophenyl)-5-(furan-2-yl)-4,5-dihydro-1H-pyrazol-1-yl)-2-oxoethoxy)benzylidene)thiazolidine-2,4-dione (14c).**

**a. FTIR**

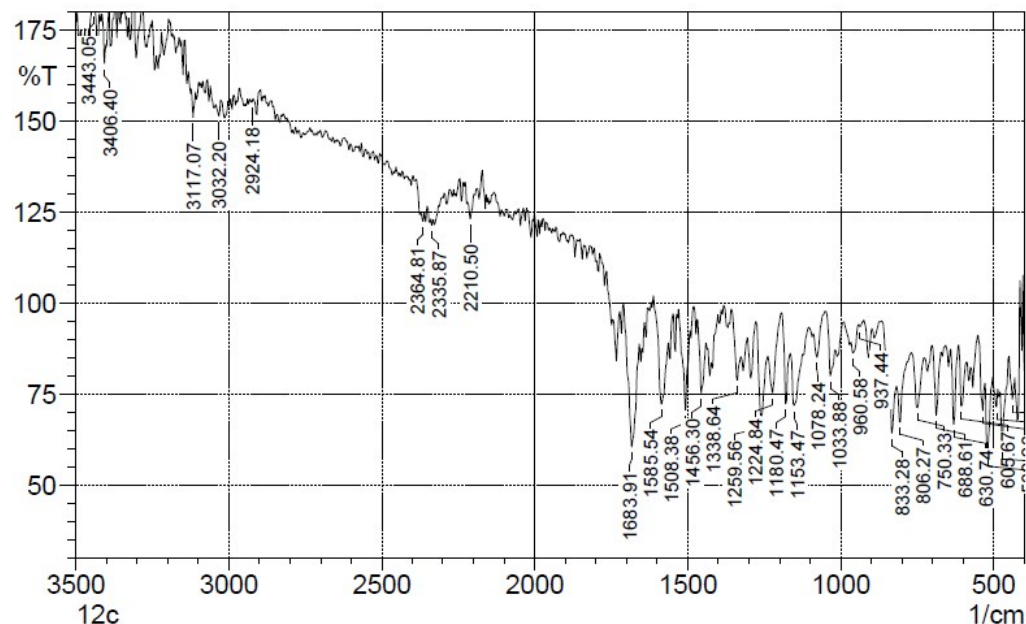

**b. <sup>1</sup>H-NMR**

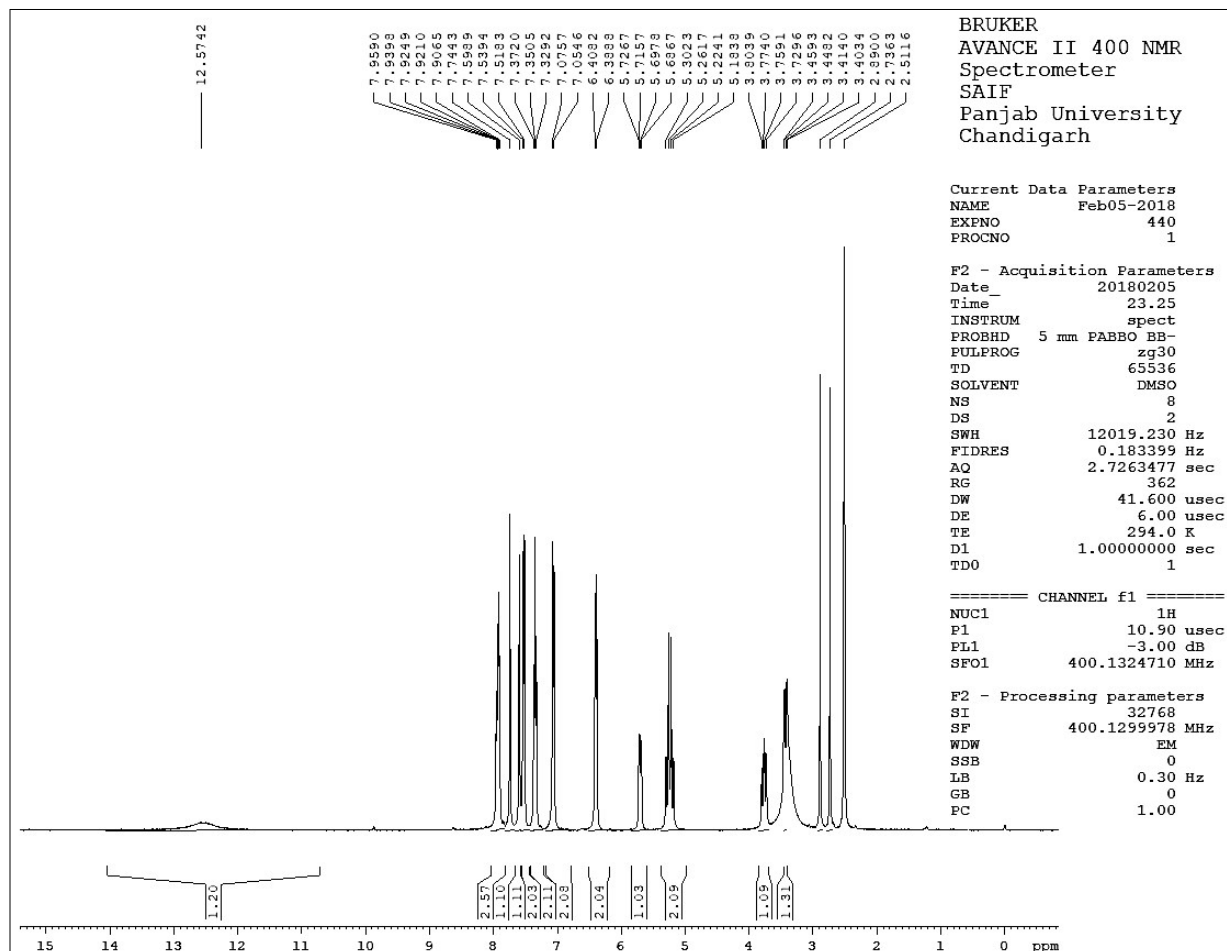

c. <sup>13</sup>C-NMR

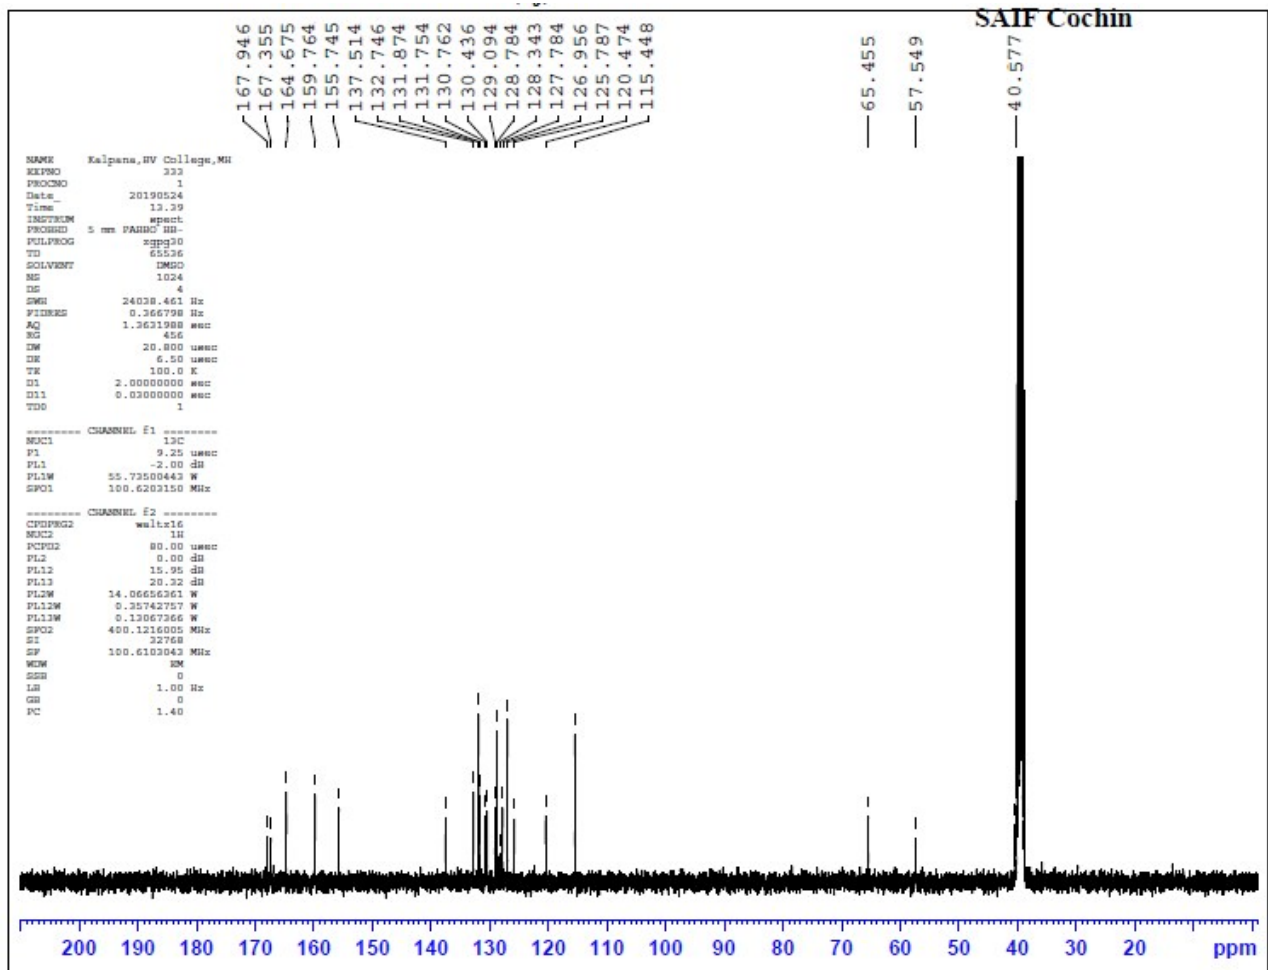

d. HPLC

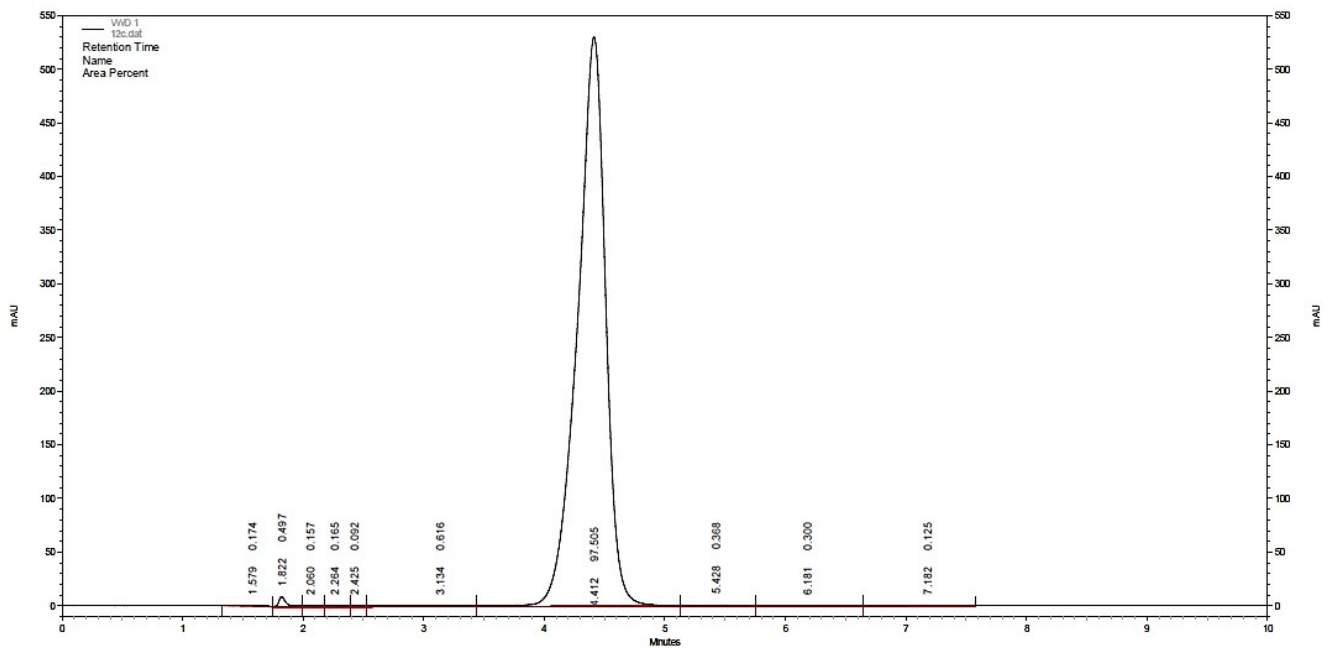

### e. Mass spectroscopy

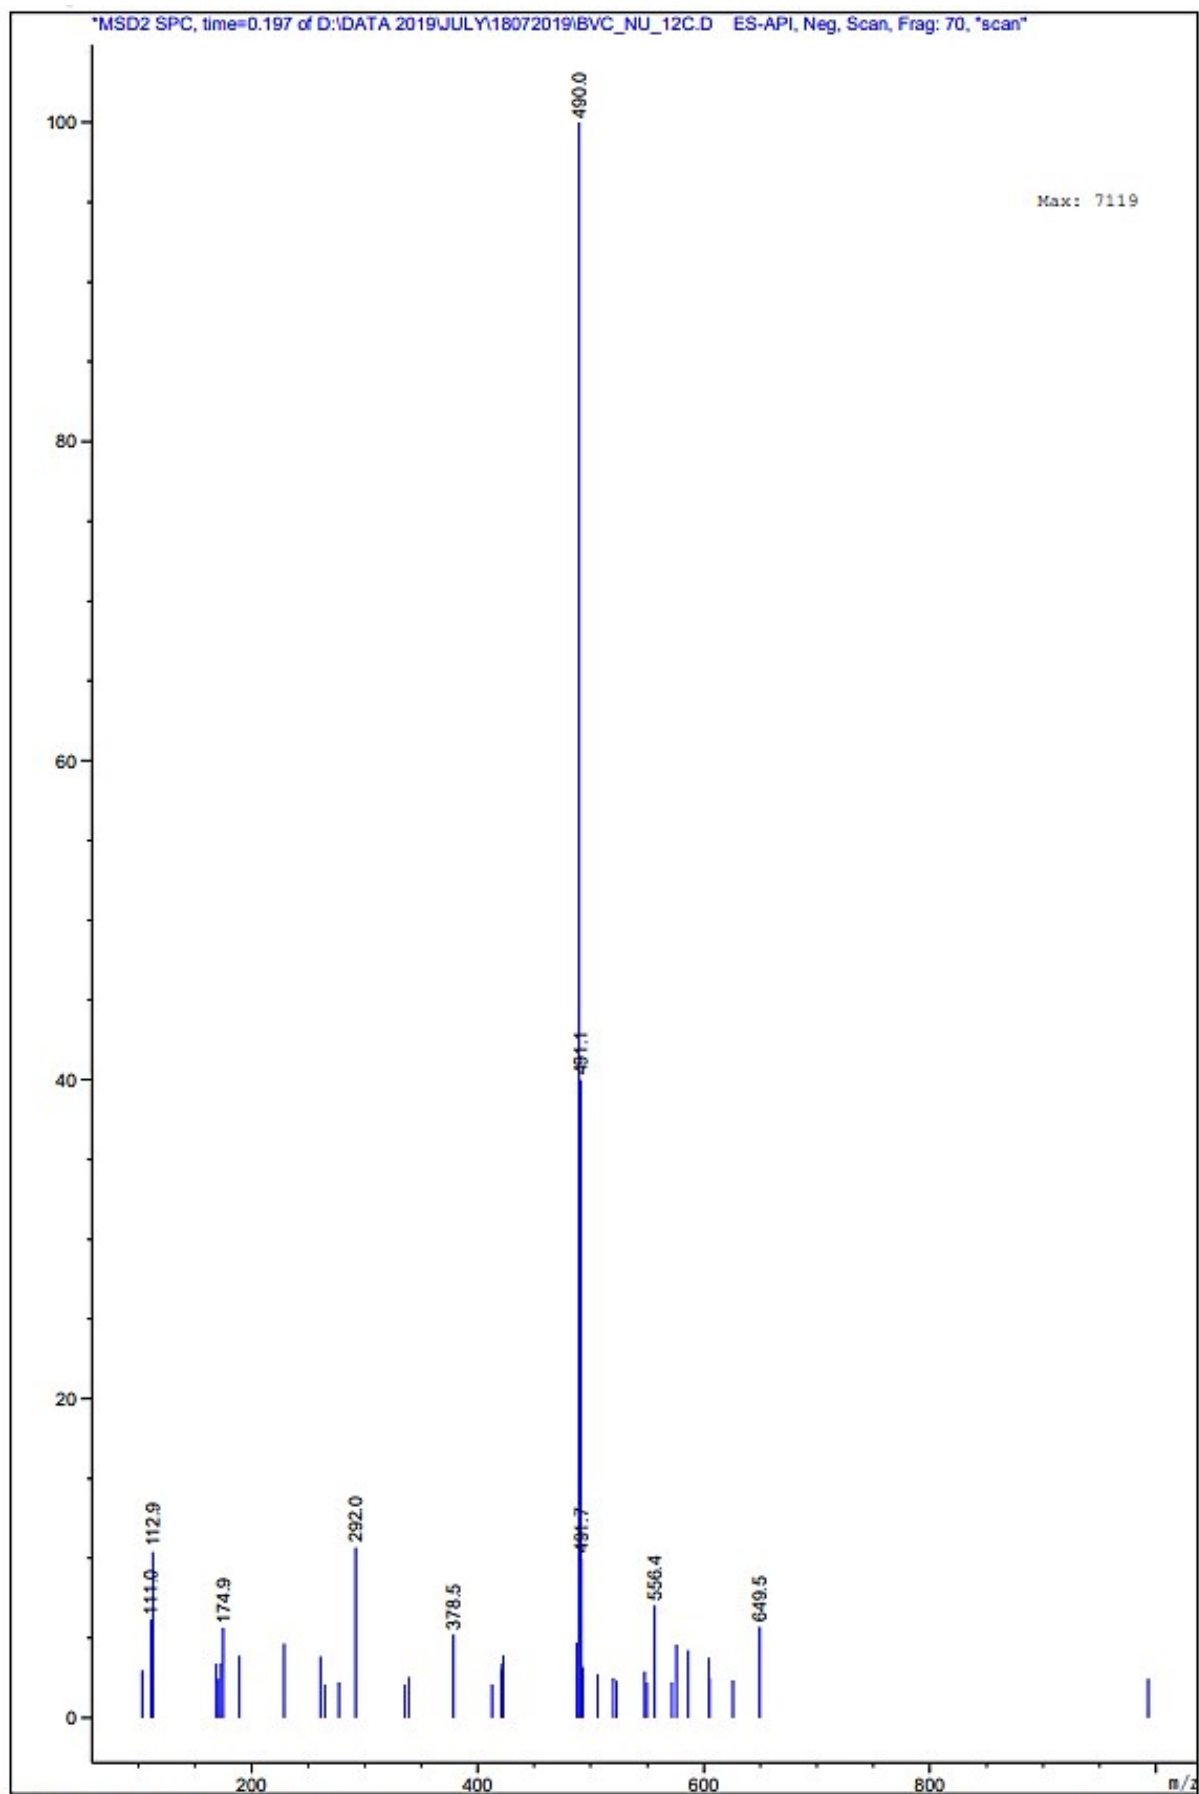

**5-(4-(2-(3-(4-fluorophenyl)-5-(4-(trifluoromethyl)phenyl)-4,5-dihydro-1H-pyrazol-1-yl)-2-oxoethoxy)benzylidene)thiazolidine-2,4-dione (14d).**

**a. FTIR**

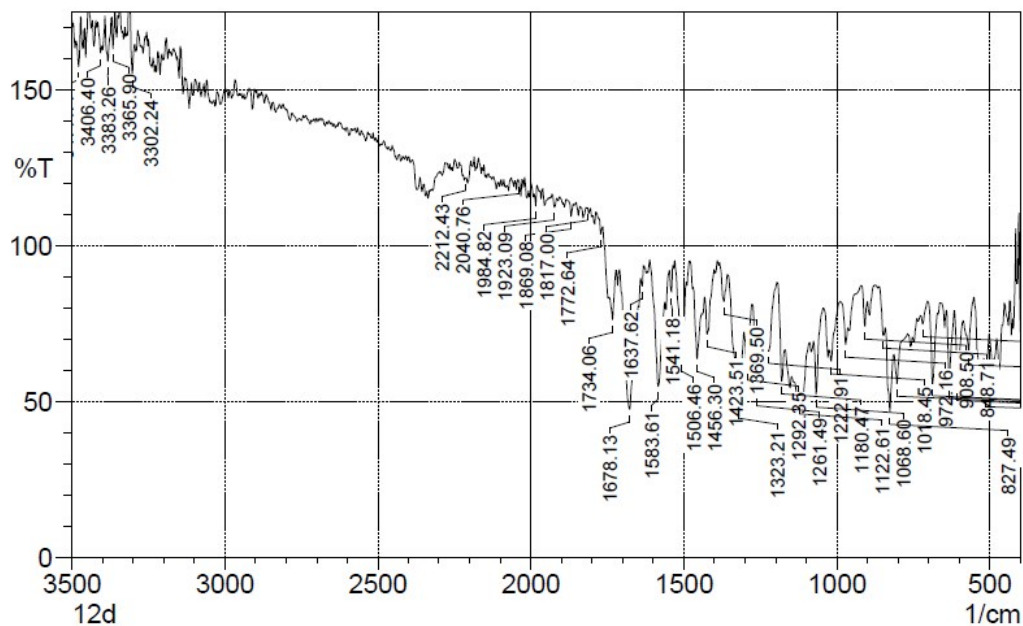

**b. <sup>1</sup>H-NMR**

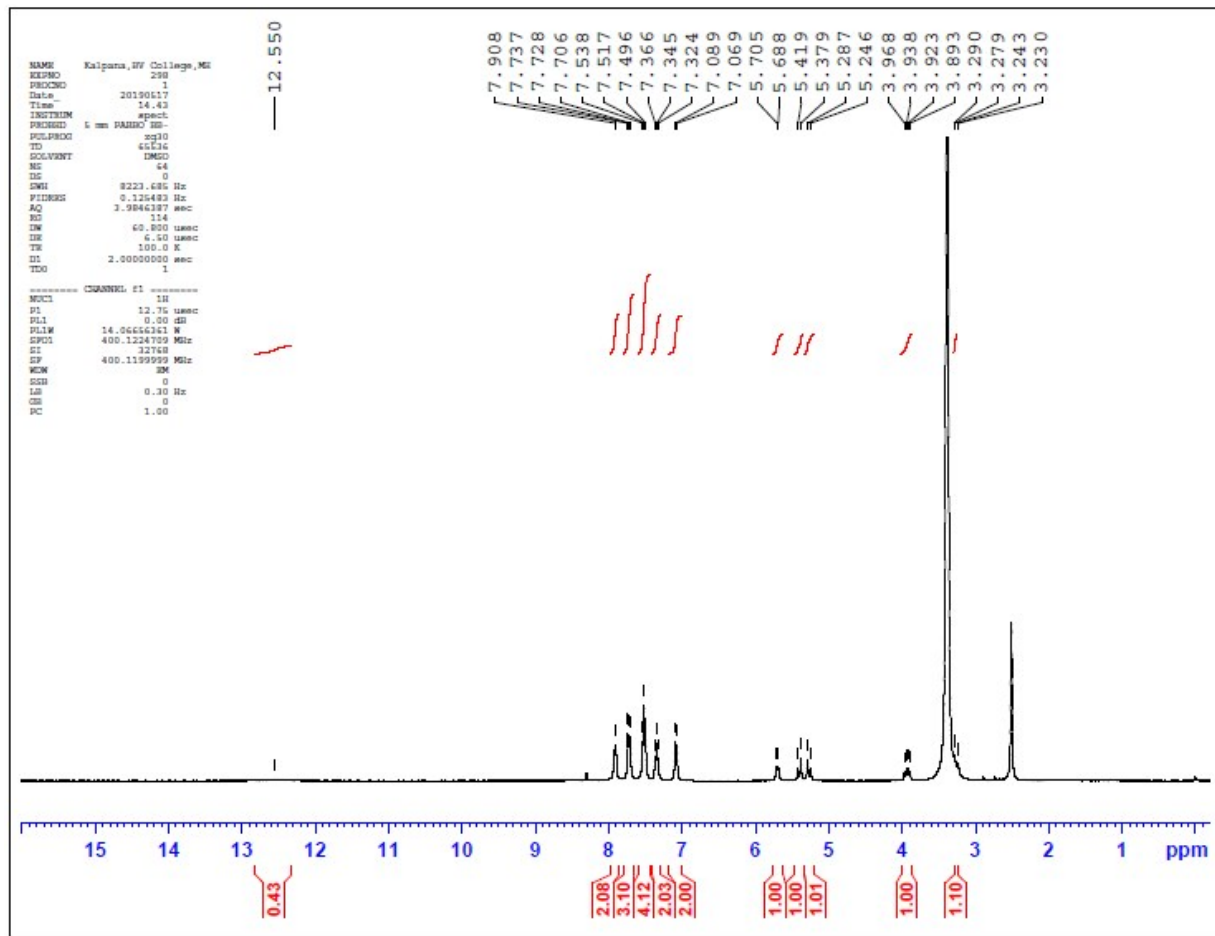

c. <sup>13</sup>C-NMR

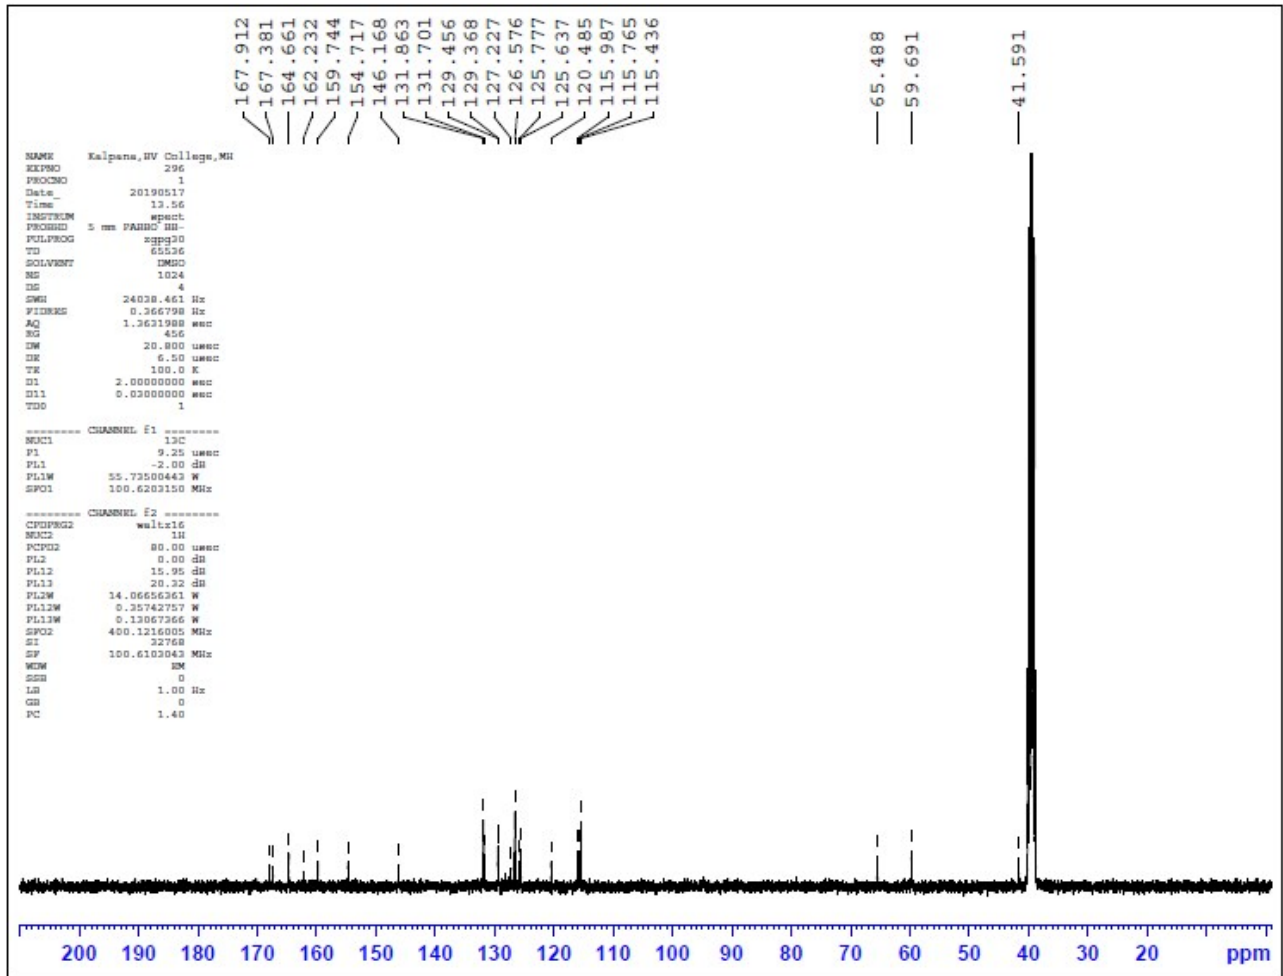

d. HPLC

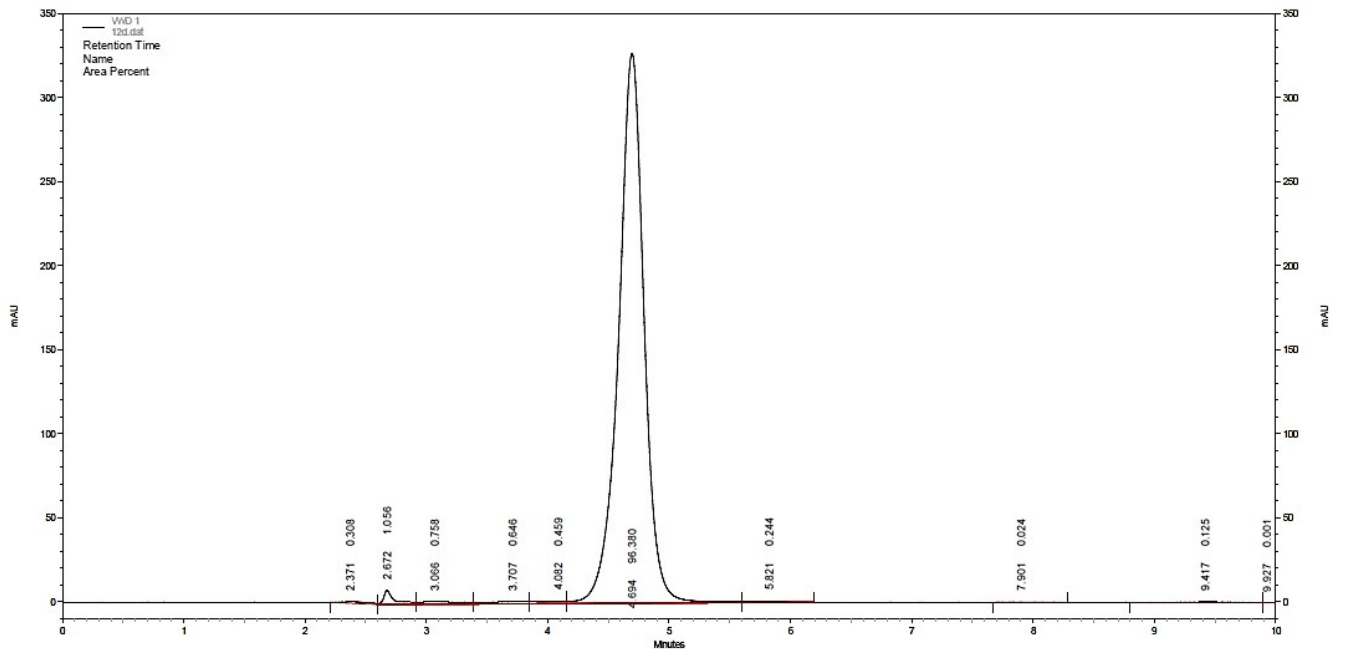

### e. Mass spectroscopy

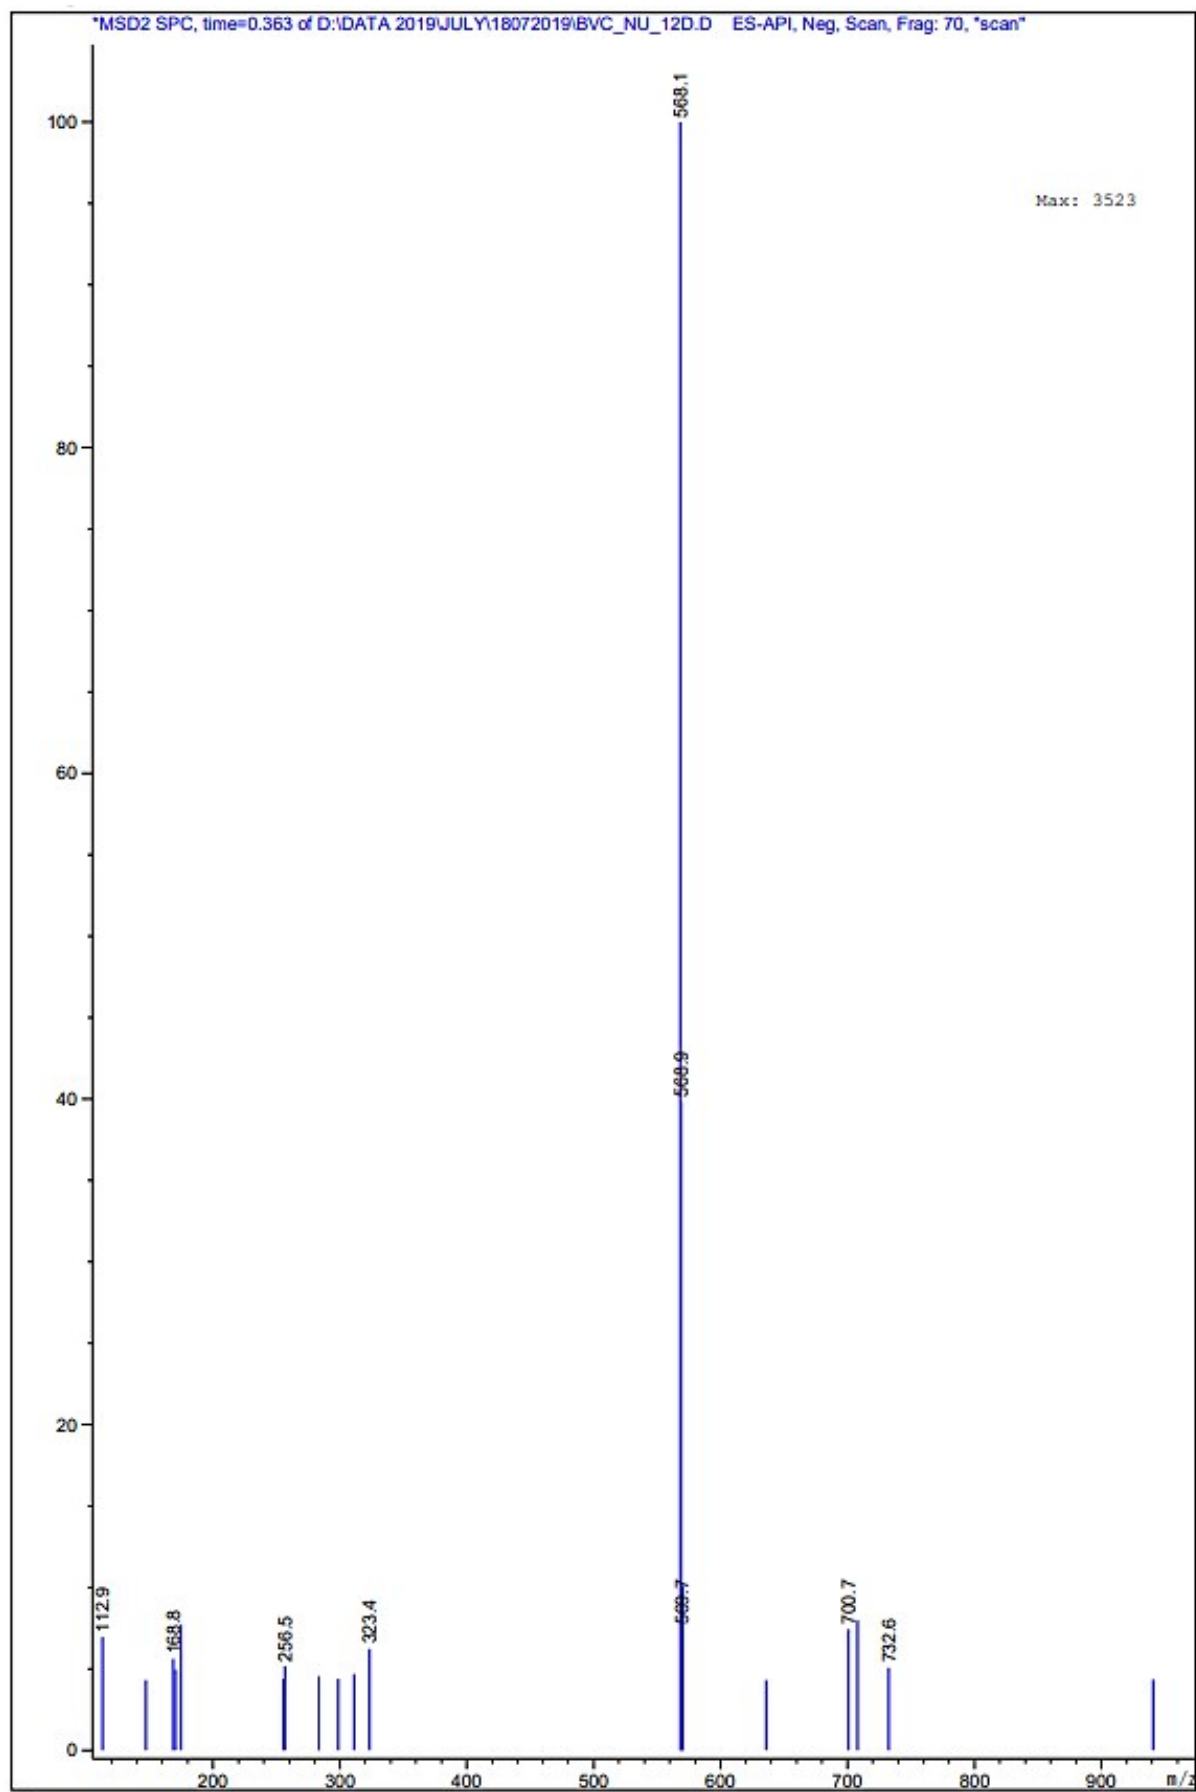



**5-(4-(2-(3,5-bis(4-fluorophenyl)-4,5-dihydro-1H-pyrazol-1-yl)-2-oxoethoxy)benzylidene)thiazolidine-2,4-dione (14e).**

**a. FTIR**

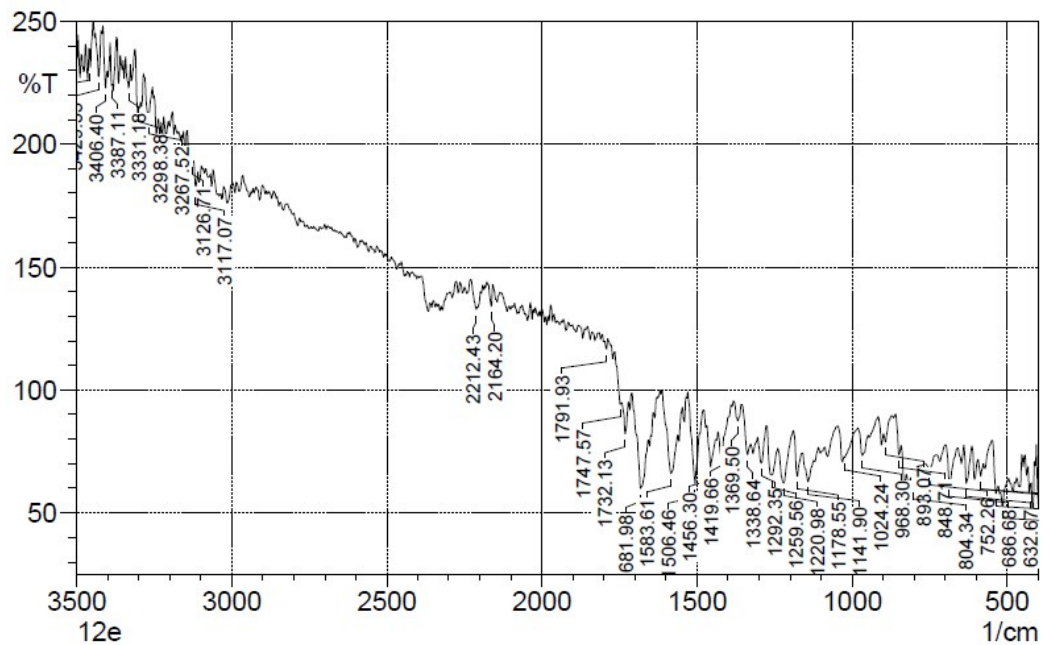

**b. <sup>1</sup>H-NMR**

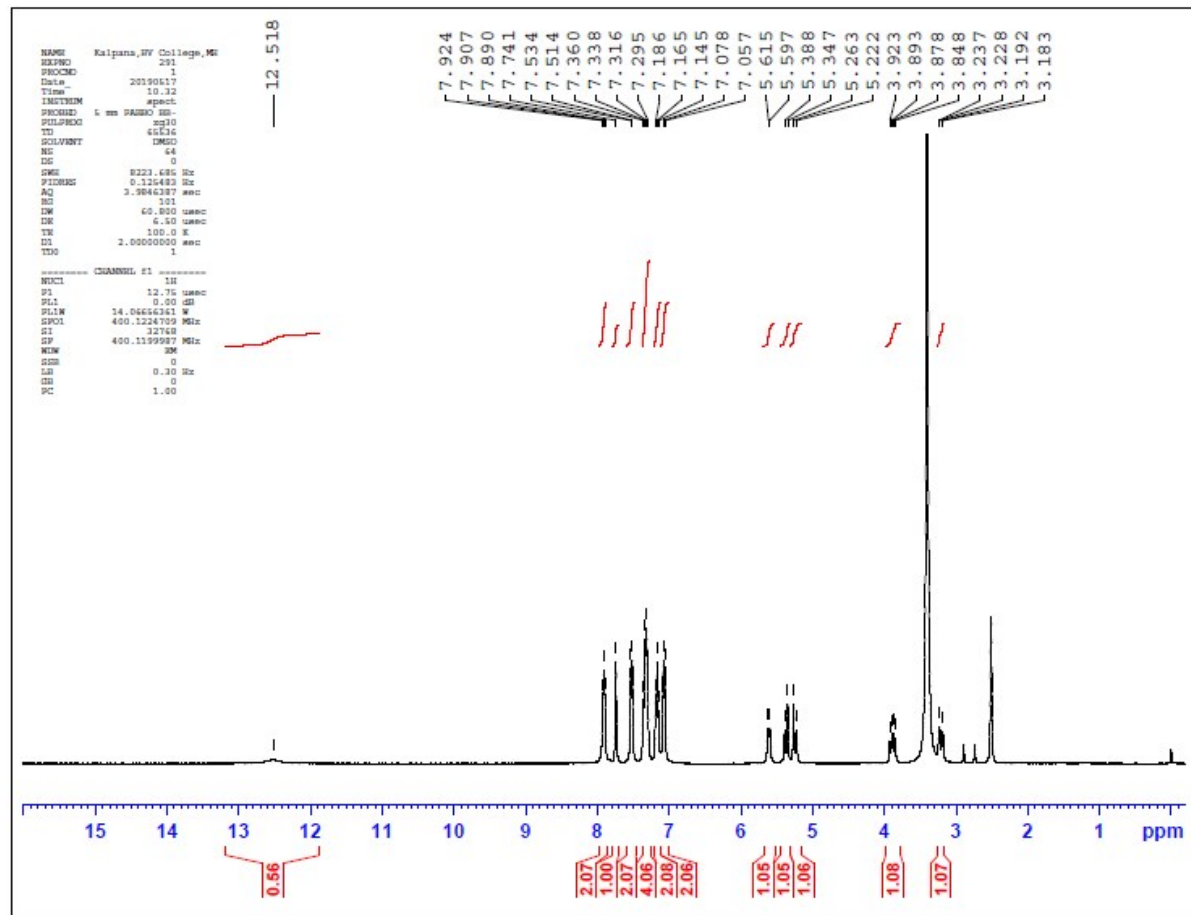

c. <sup>13</sup>C-NMR

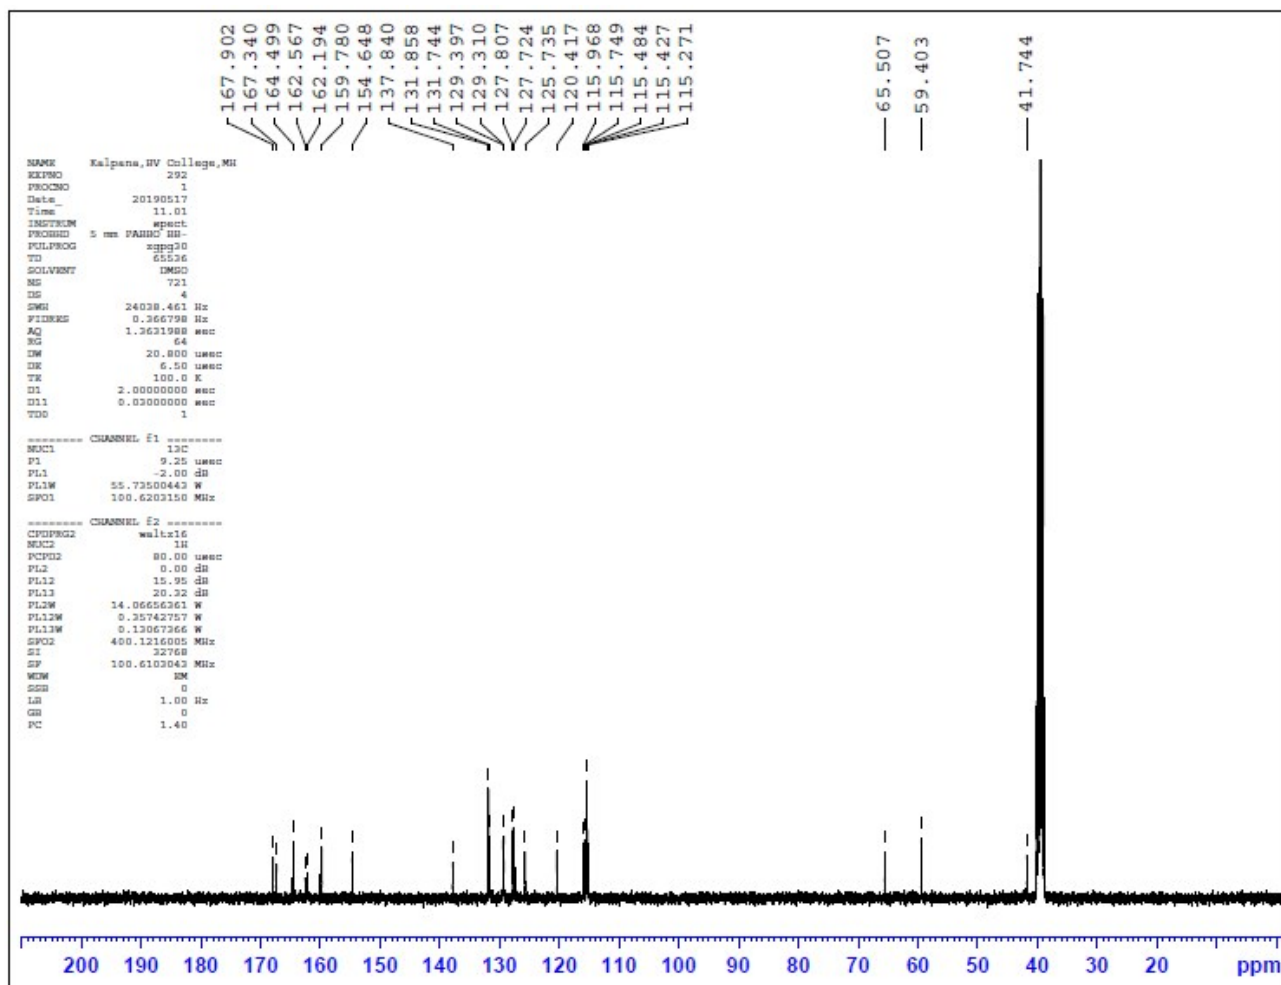

d. HPLC

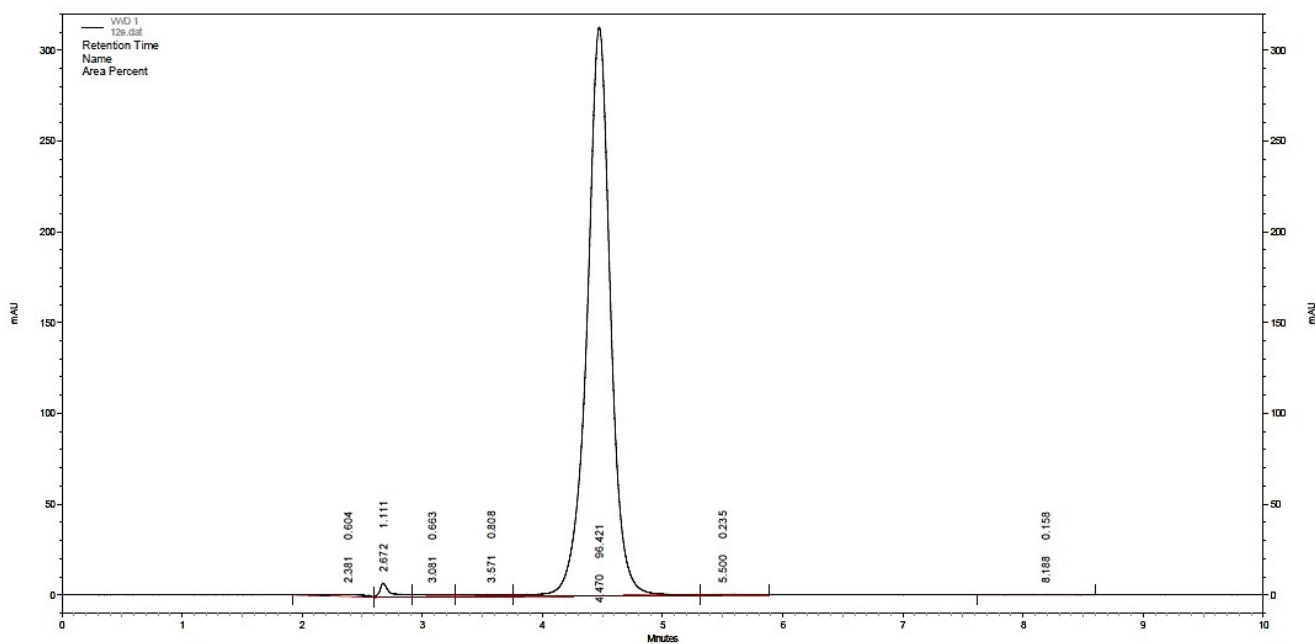

### e. Mass spectroscopy

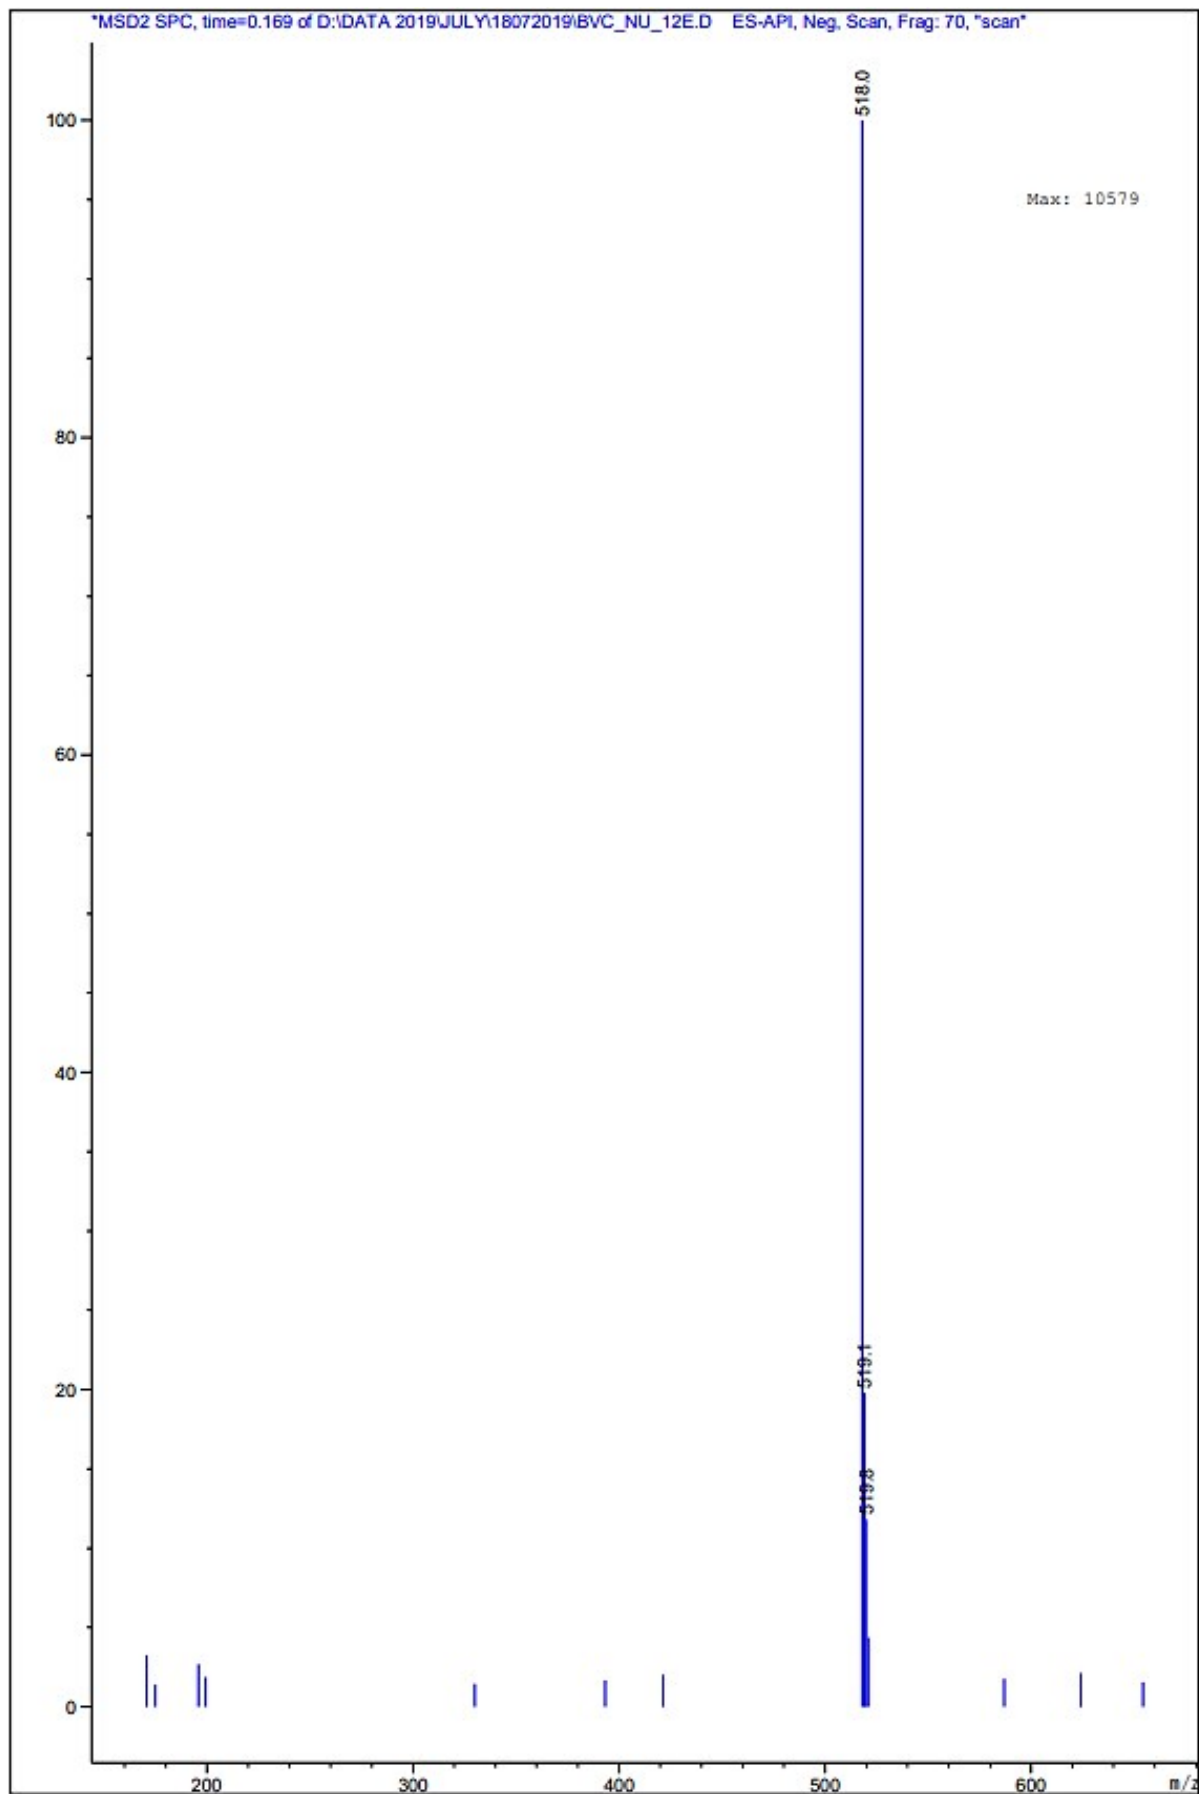

**5-(4-(2-(5-(2,4-difluorophenyl)-3-(4-fluorophenyl)-4,5-dihydro-1H-pyrazol-1-yl)-2-oxoethoxy)benzylidene) thiazolidine-2,4-dione (14f).**

**a. FTIR**

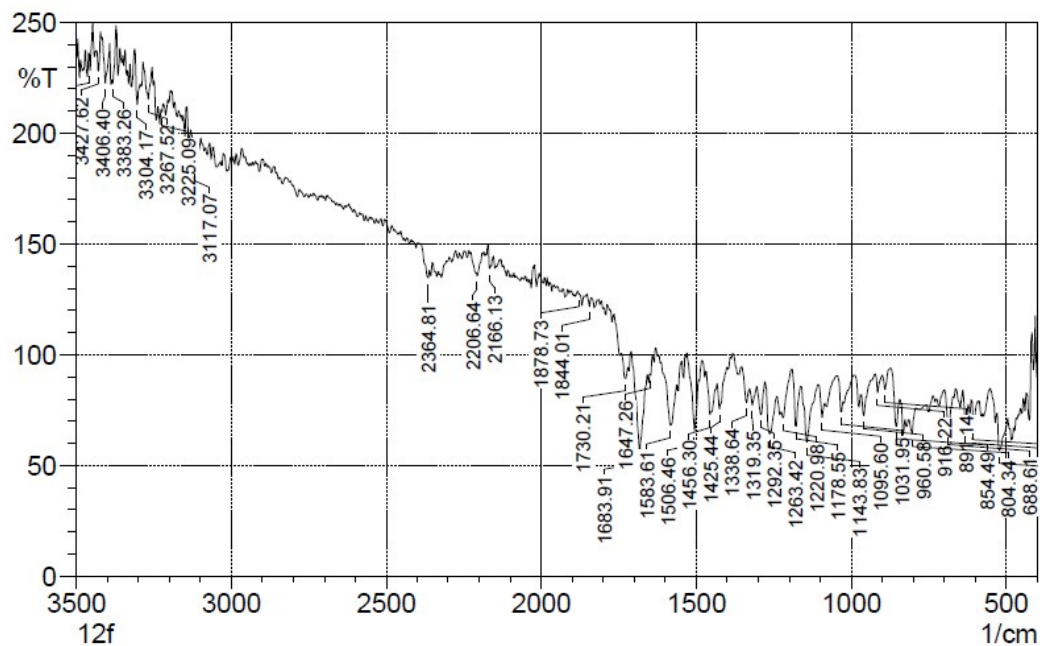

**b. <sup>1</sup>H-NMR**

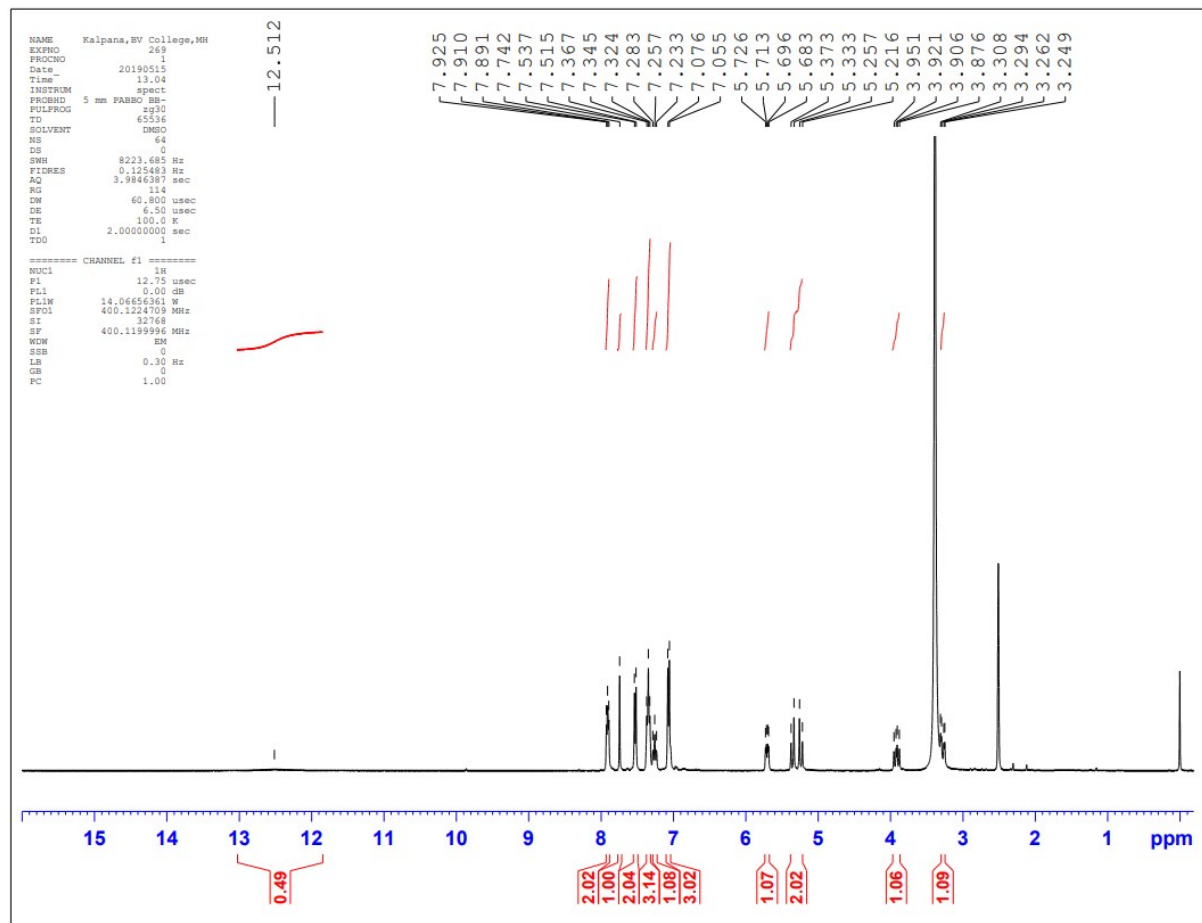

c. <sup>13</sup>C-NMR

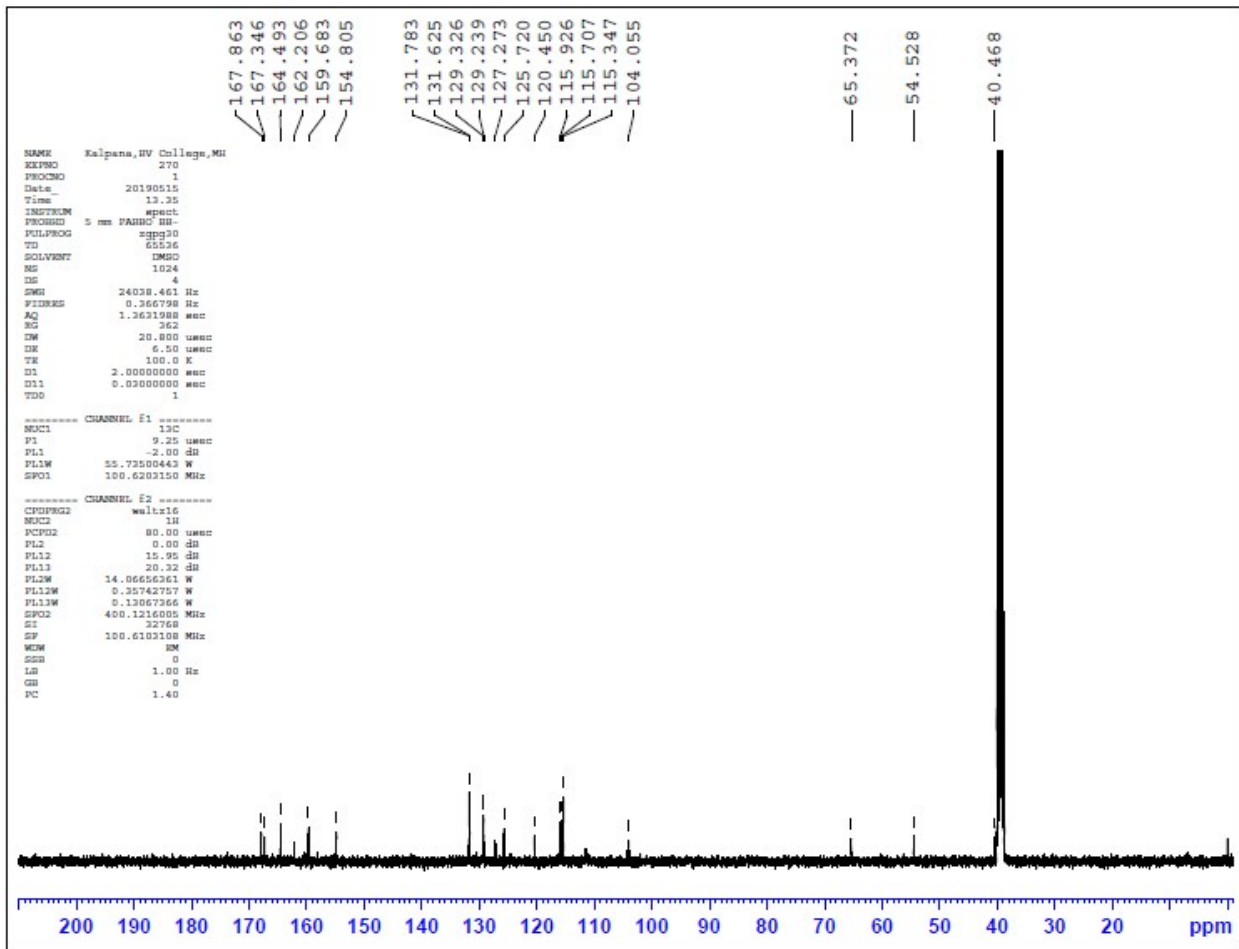

d. HPLC

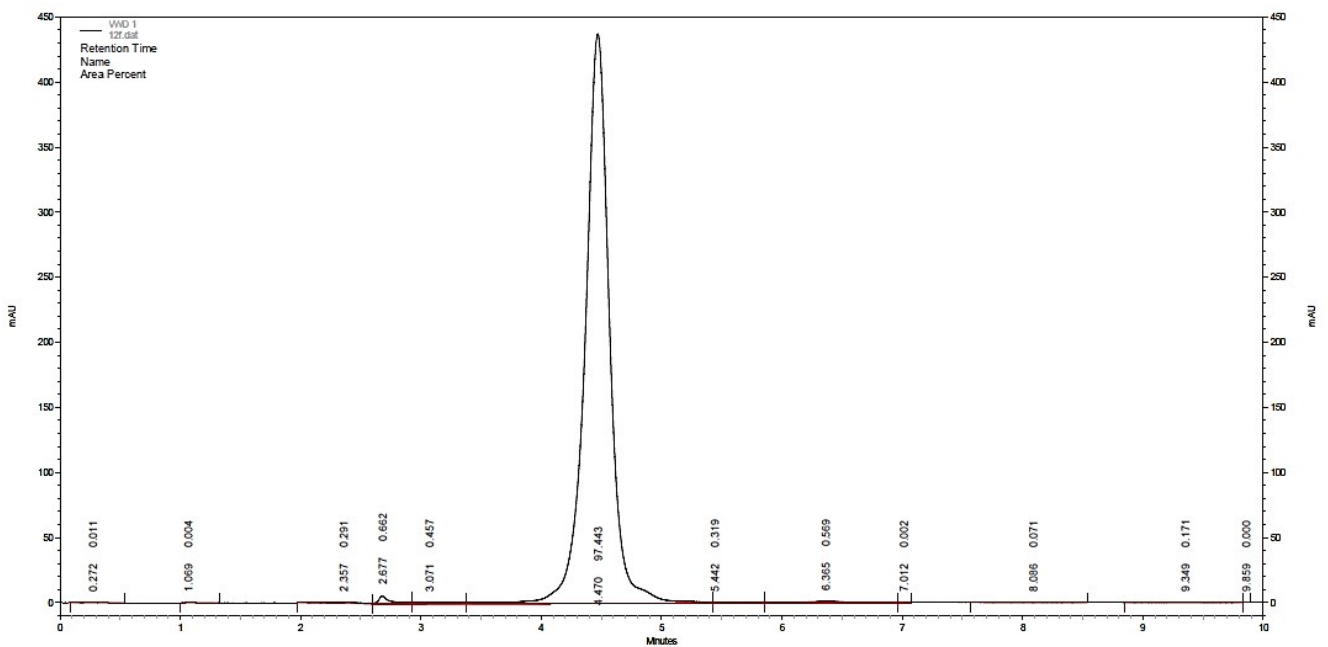

### e. Mass spectroscopy

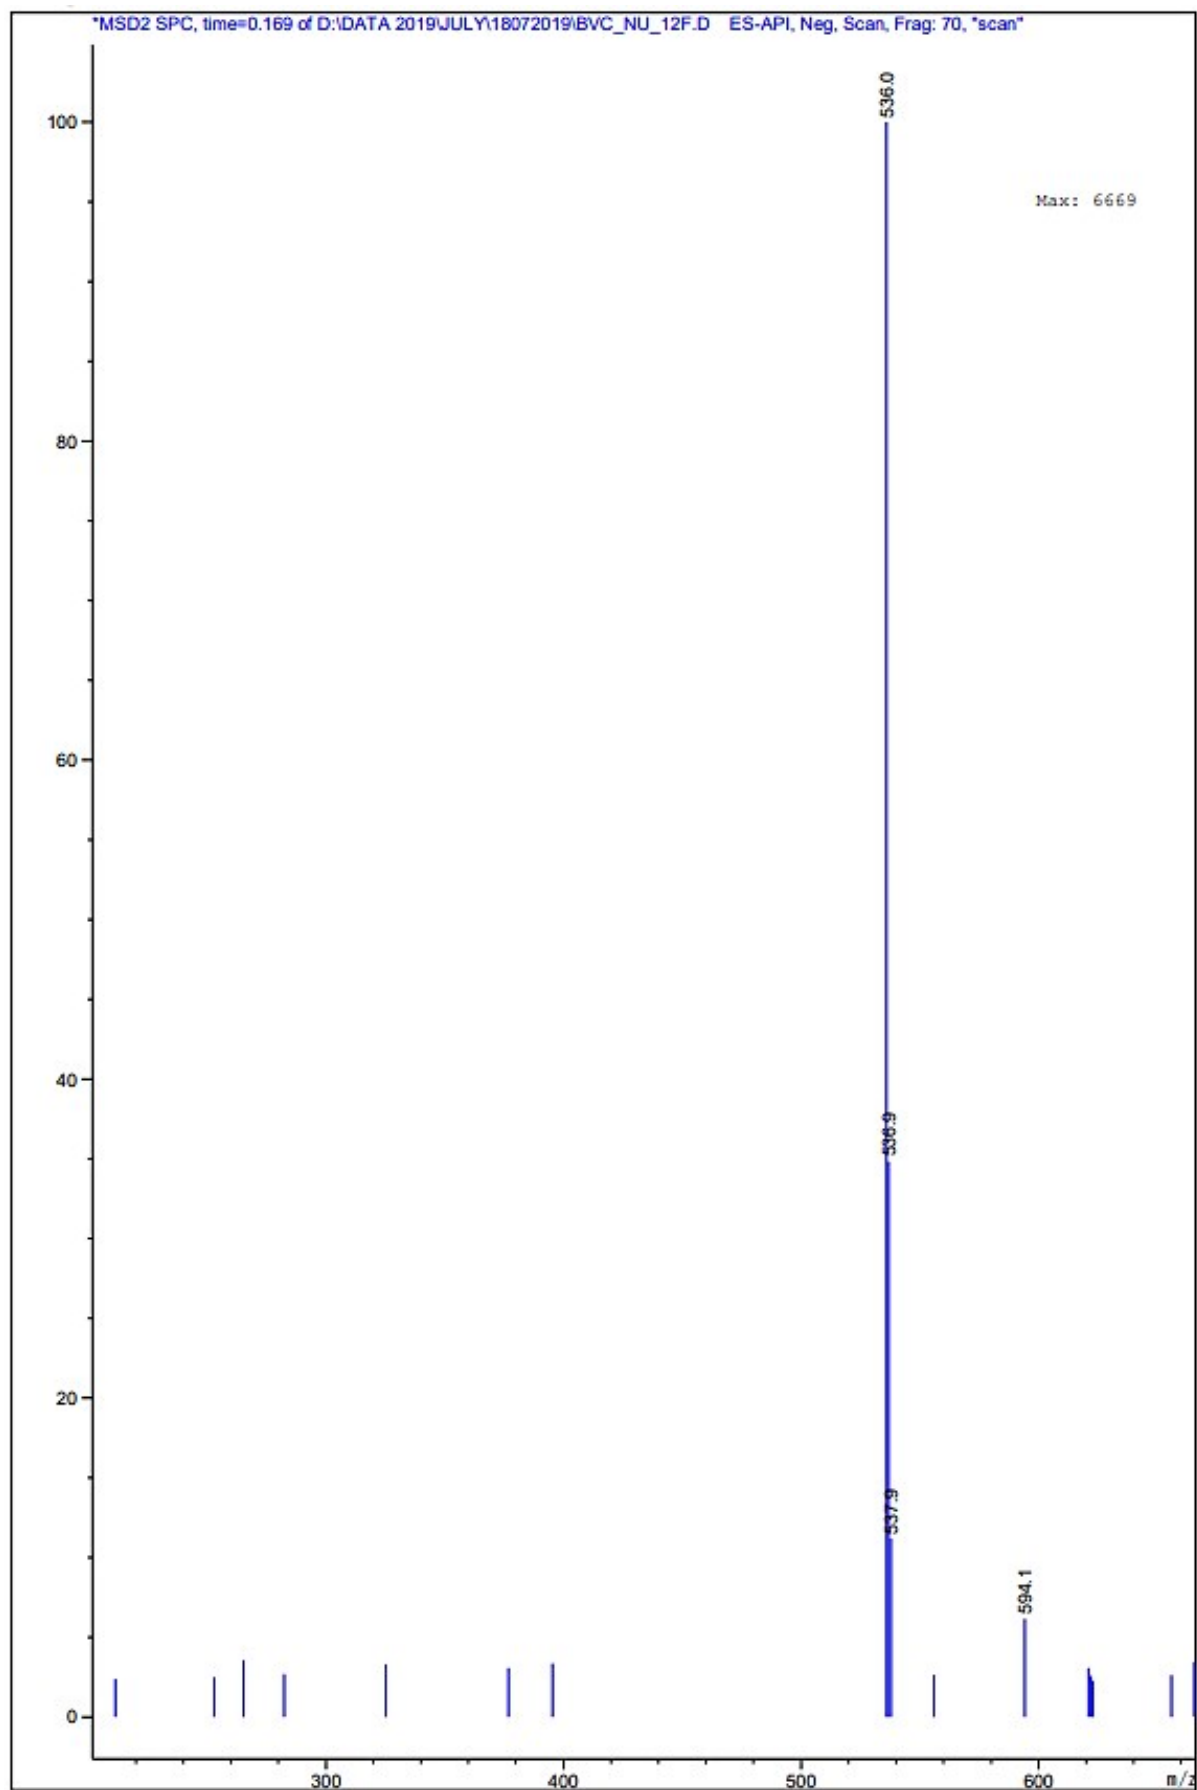

**5-(4-(2-(3-(4-fluorophenyl)-5-(p-tolyl)-4,5-dihydro-1H-pyrazol-1-yl)-2-oxoethoxy)benzylidene)thiazolidine-2,4-dione (14g).**

**a. FTIR**

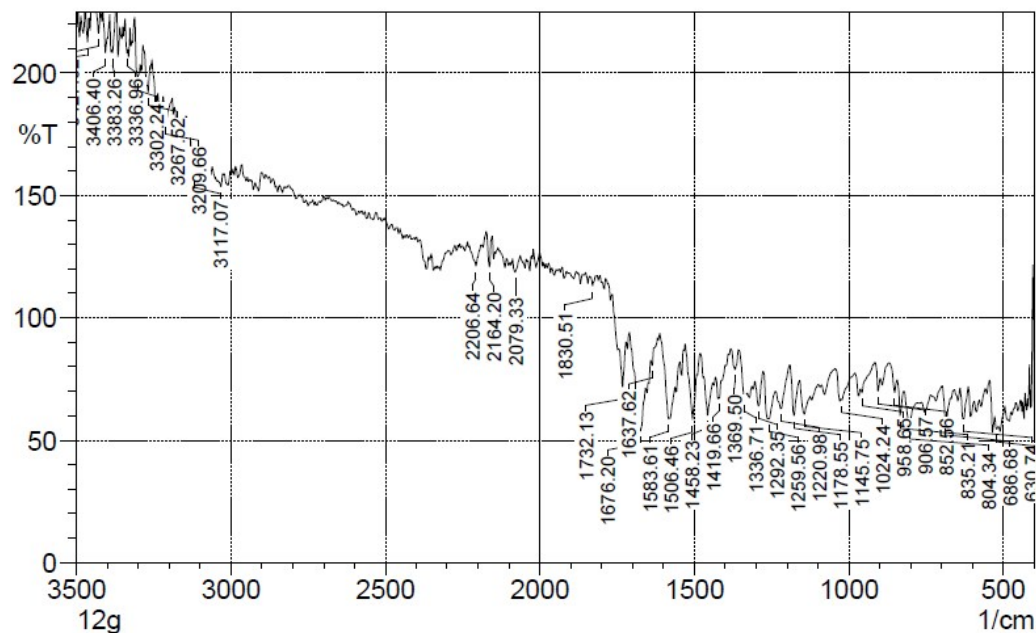

**b. <sup>1</sup>H-NMR**

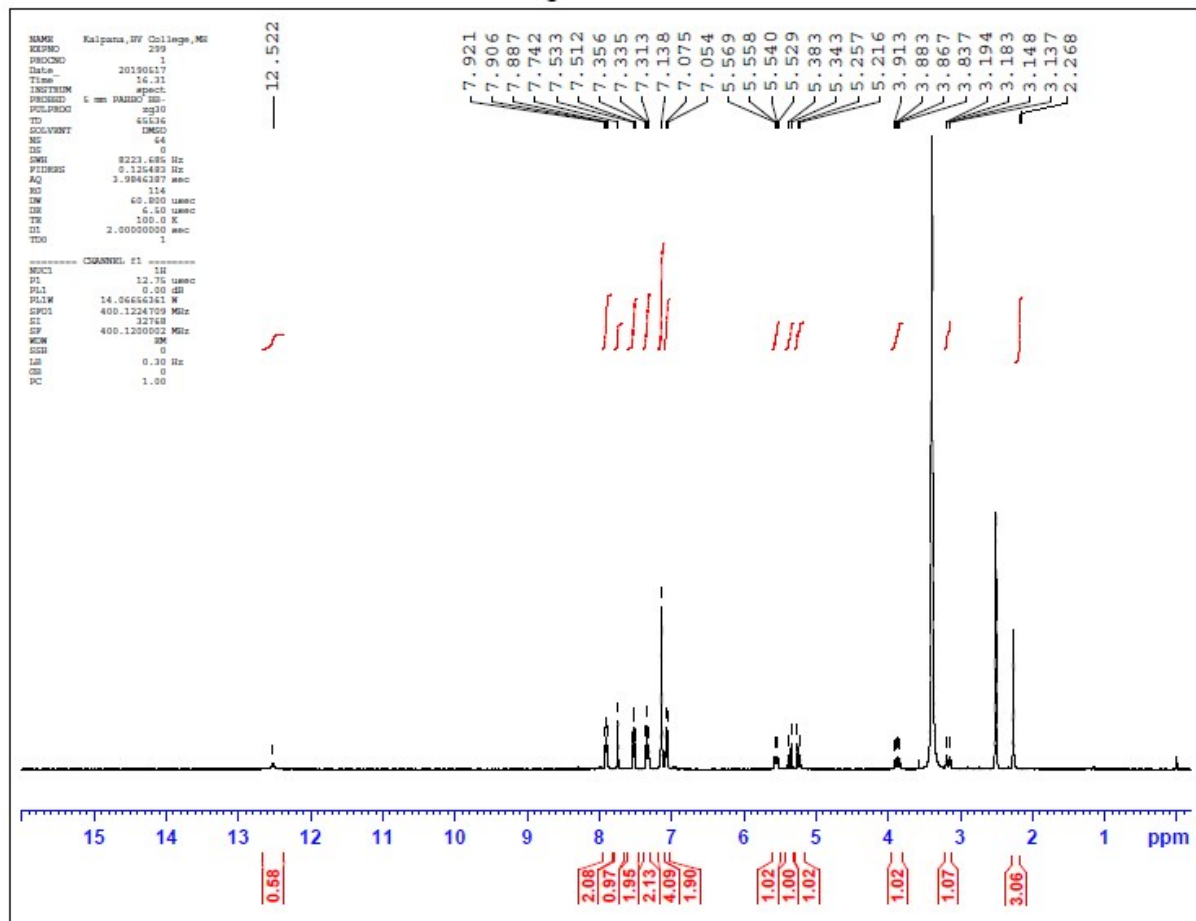

c. <sup>13</sup>C-NMR

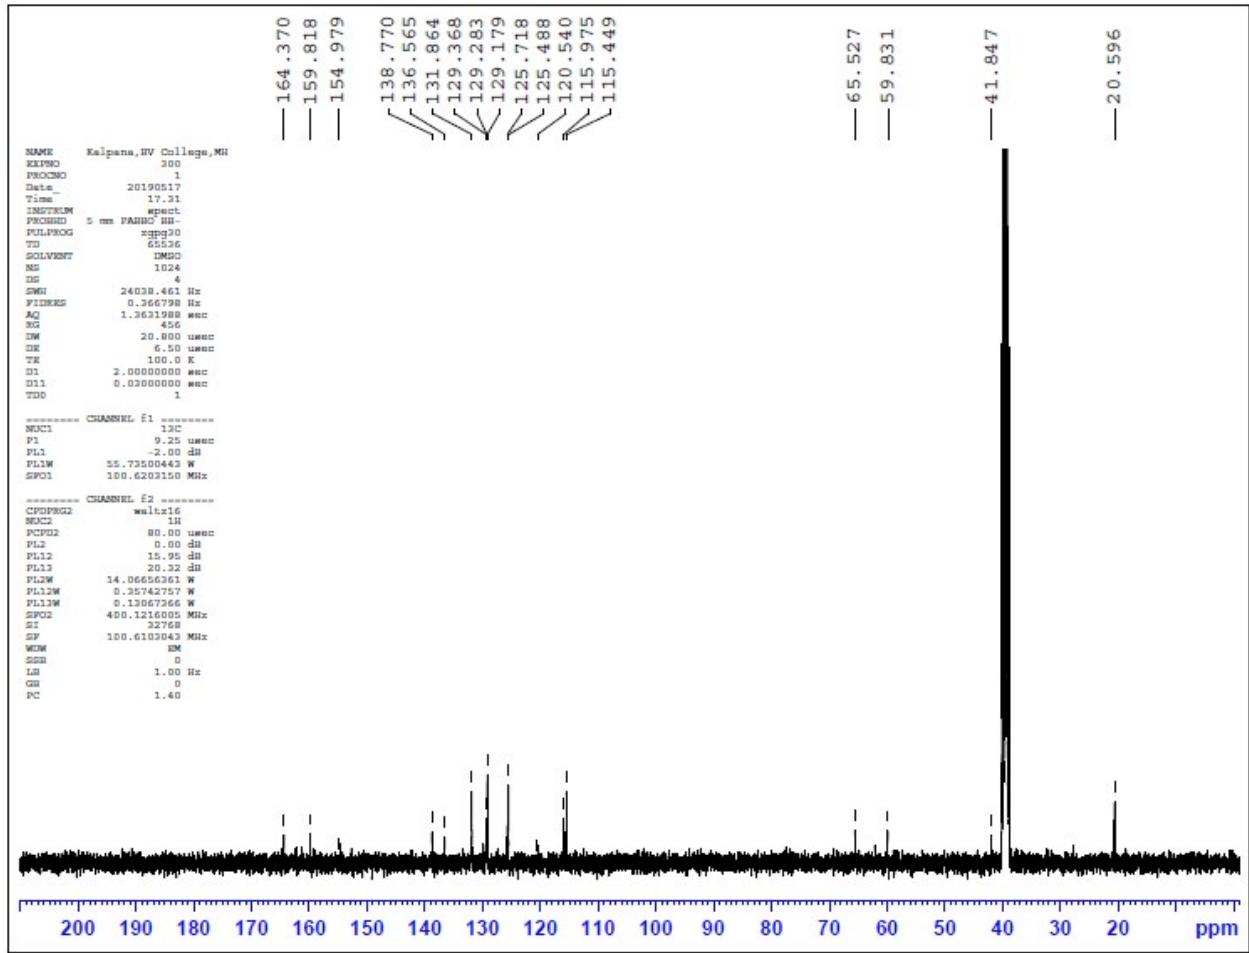

d. HPLC

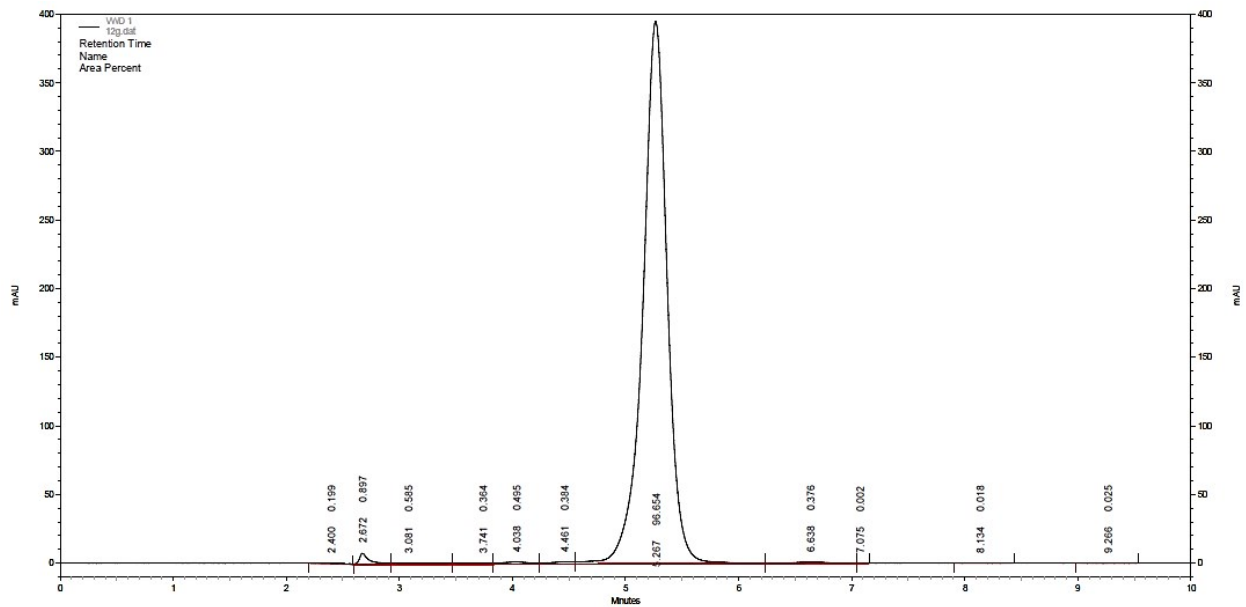



### e. Mass spectroscopy

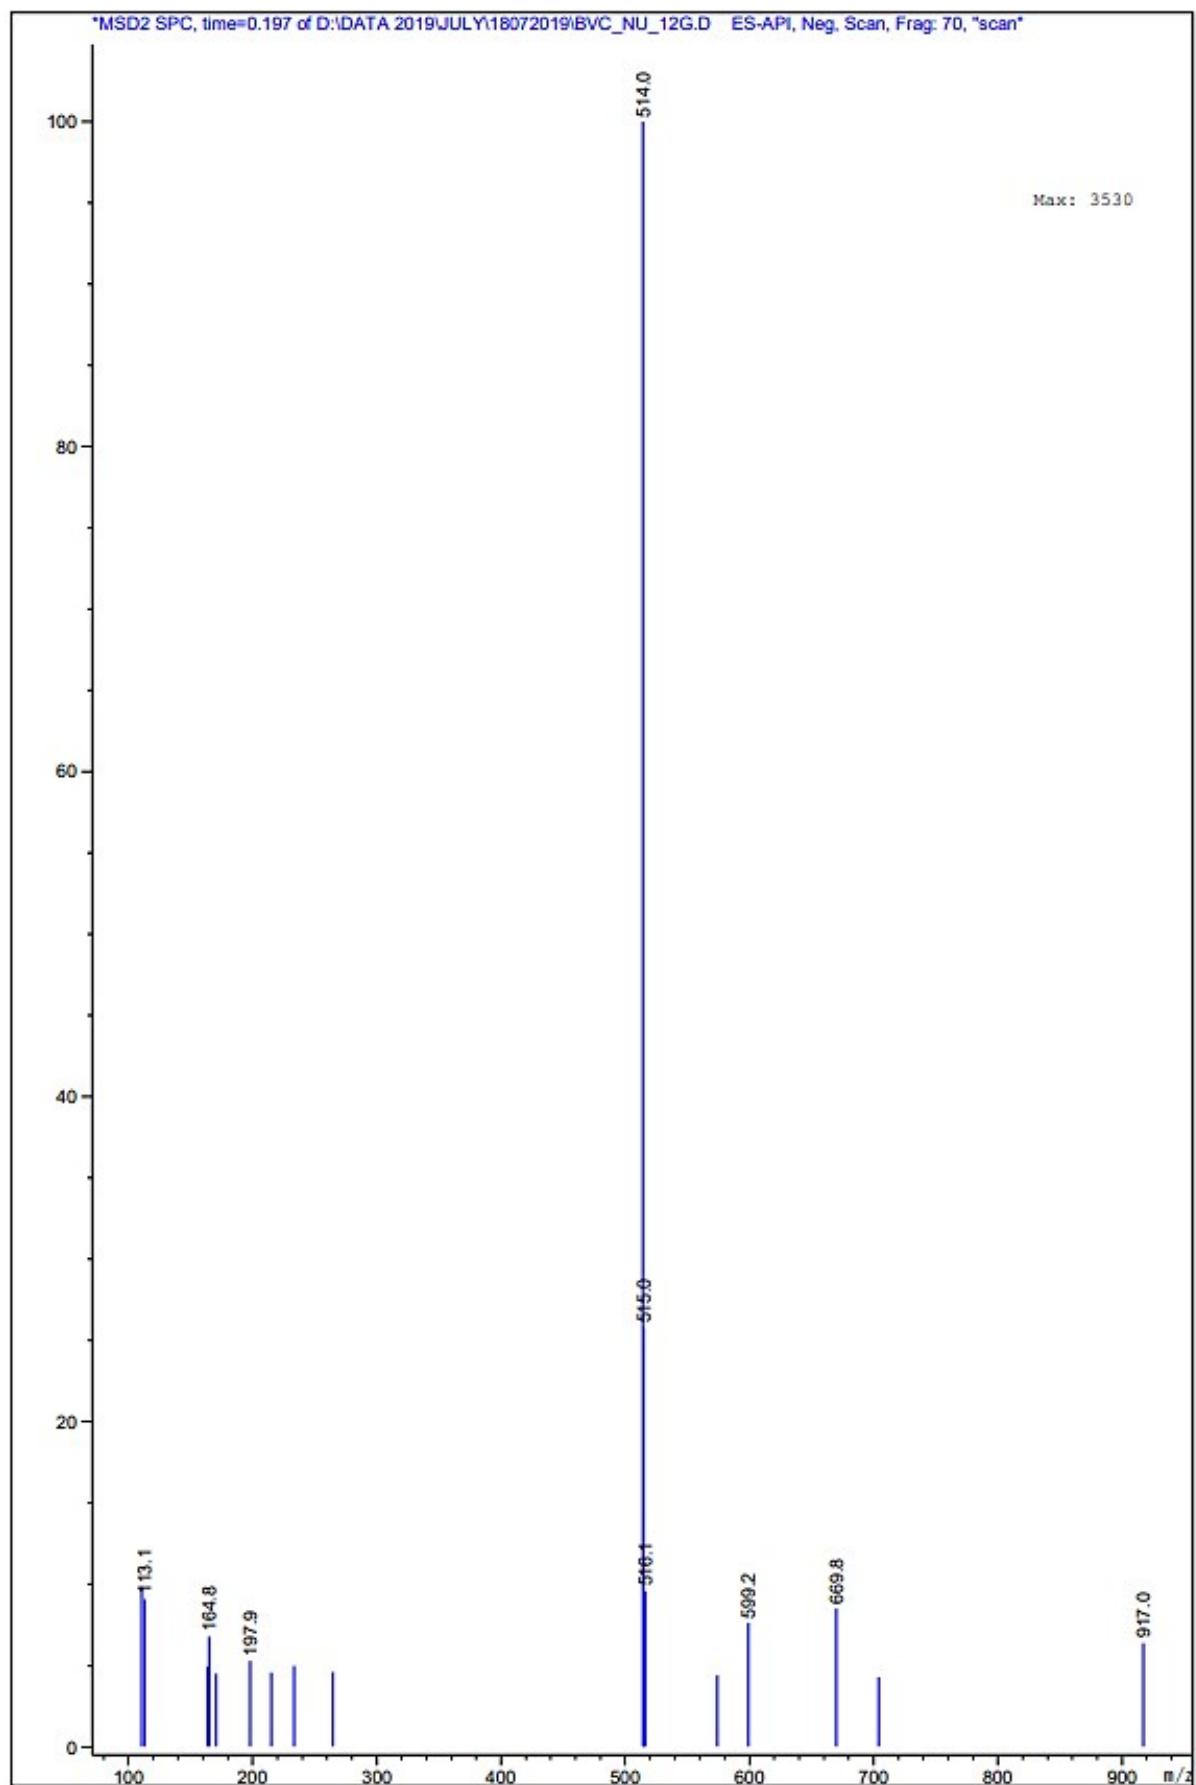

**5-(4-(2-(5-(3,4-dichlorophenyl)-3-(4-fluorophenyl)-4,5-dihydro-1H-pyrazol-1-yl)-2-oxoethoxy)benzylidene)thiazolidine-2,4-dione (14j).**

**a. FTIR**

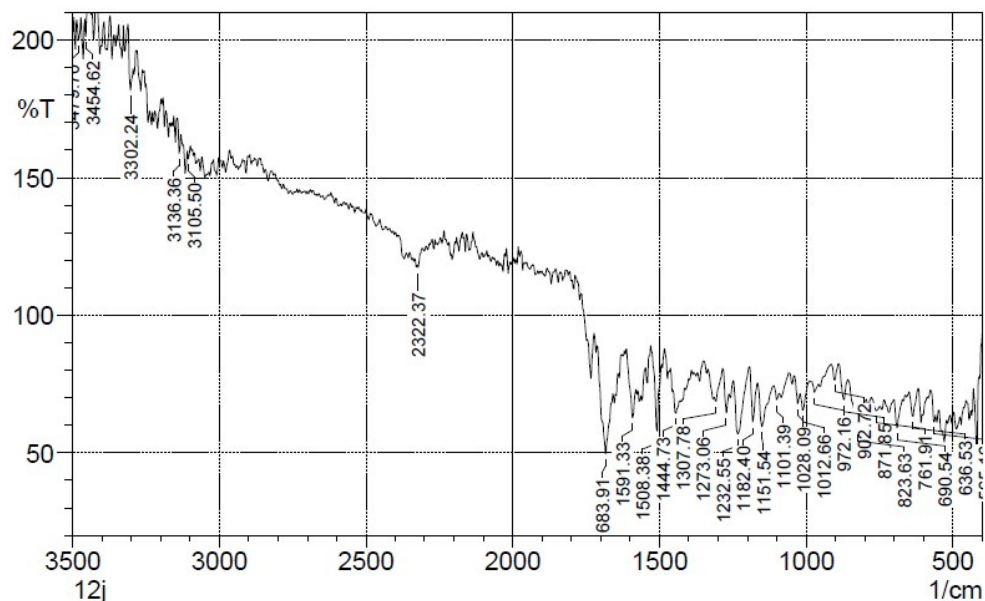

**b. <sup>1</sup>H-NMR**

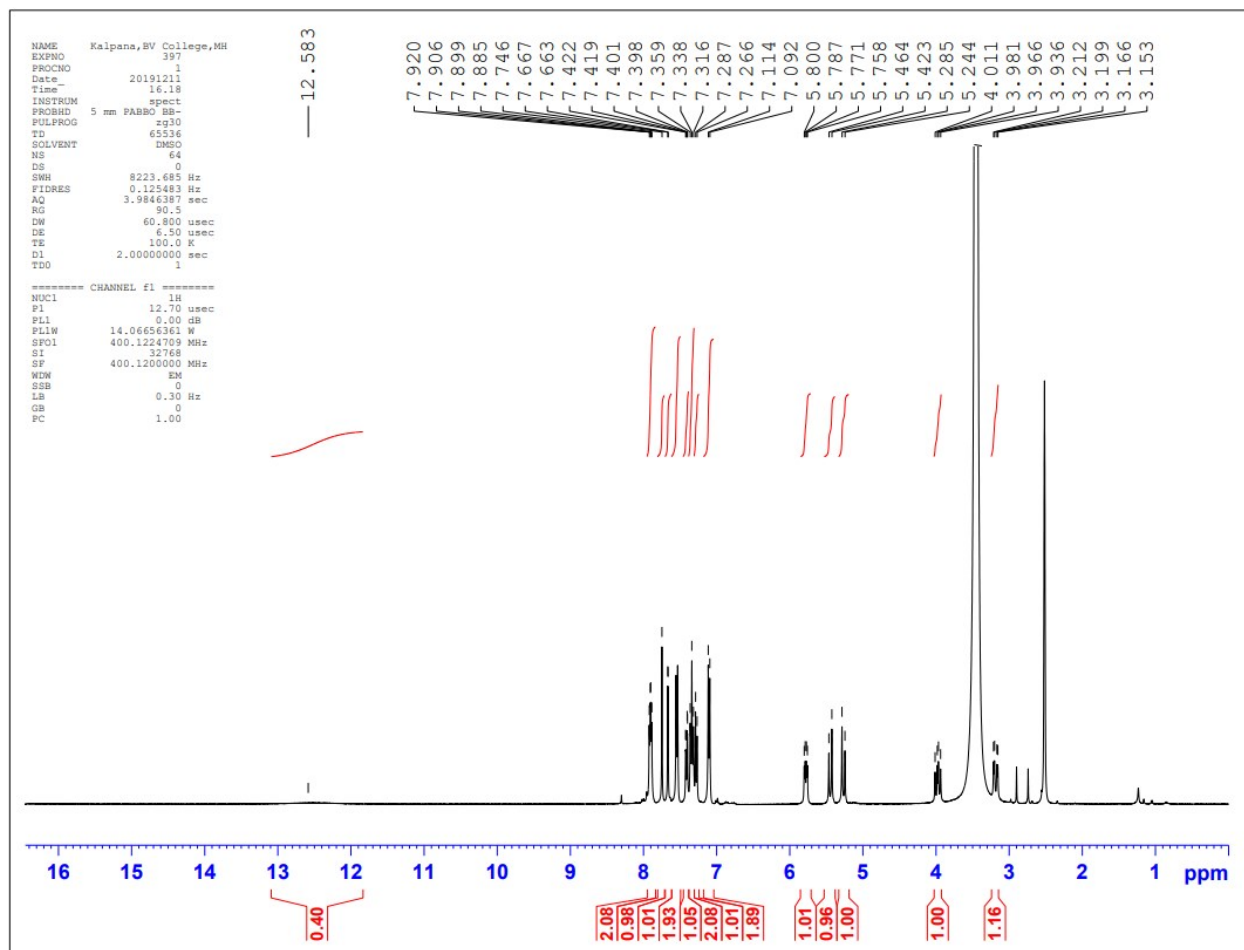

c. <sup>13</sup>C-NMR

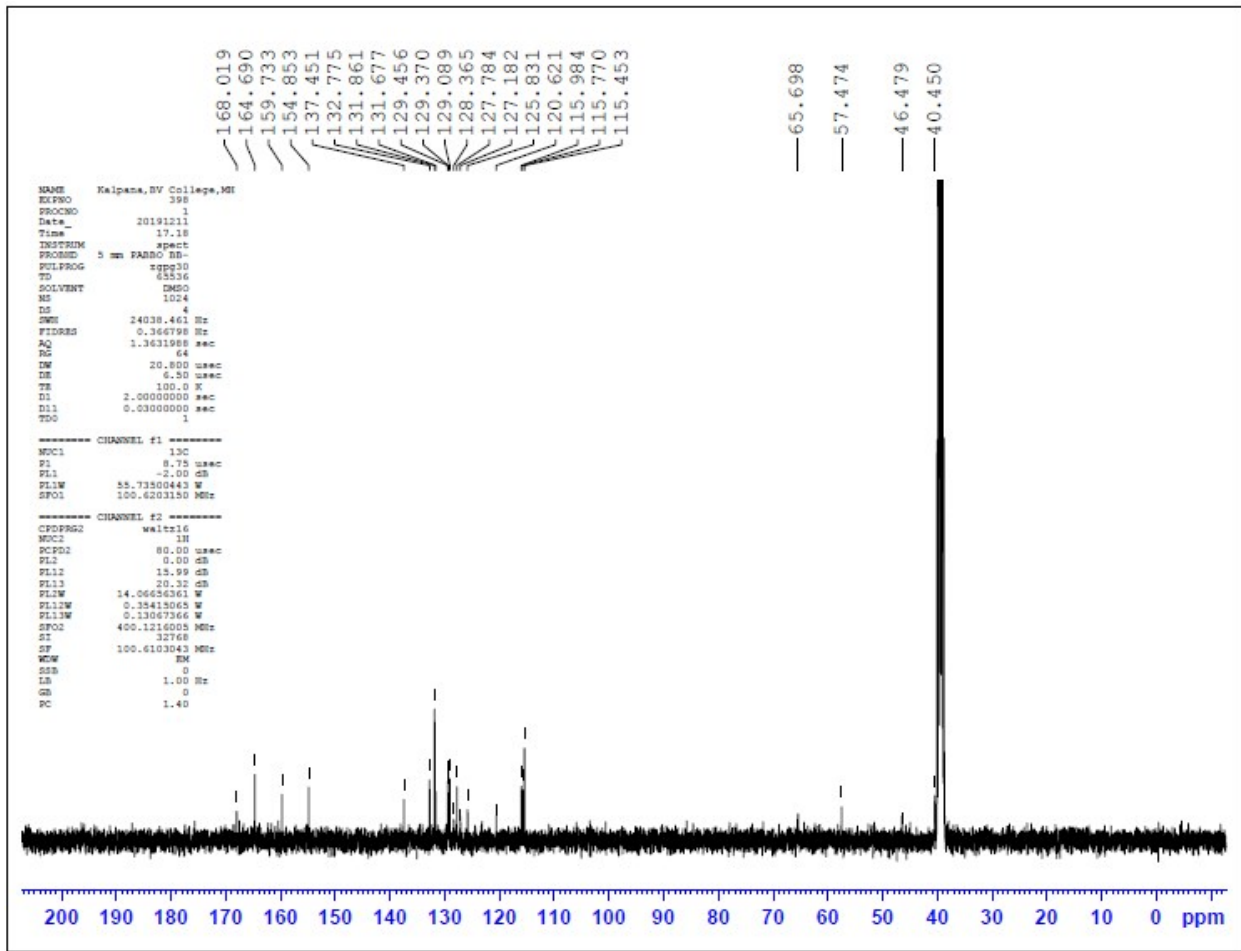

d. HPLC

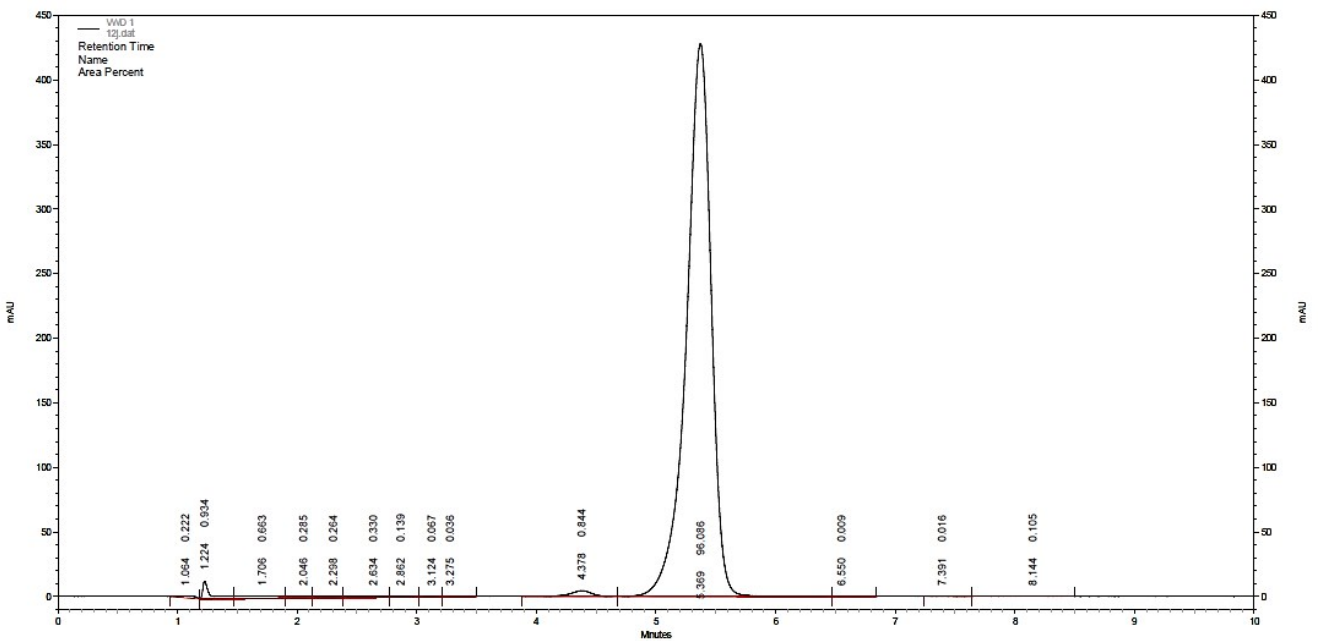

### e. Mass spectroscopy

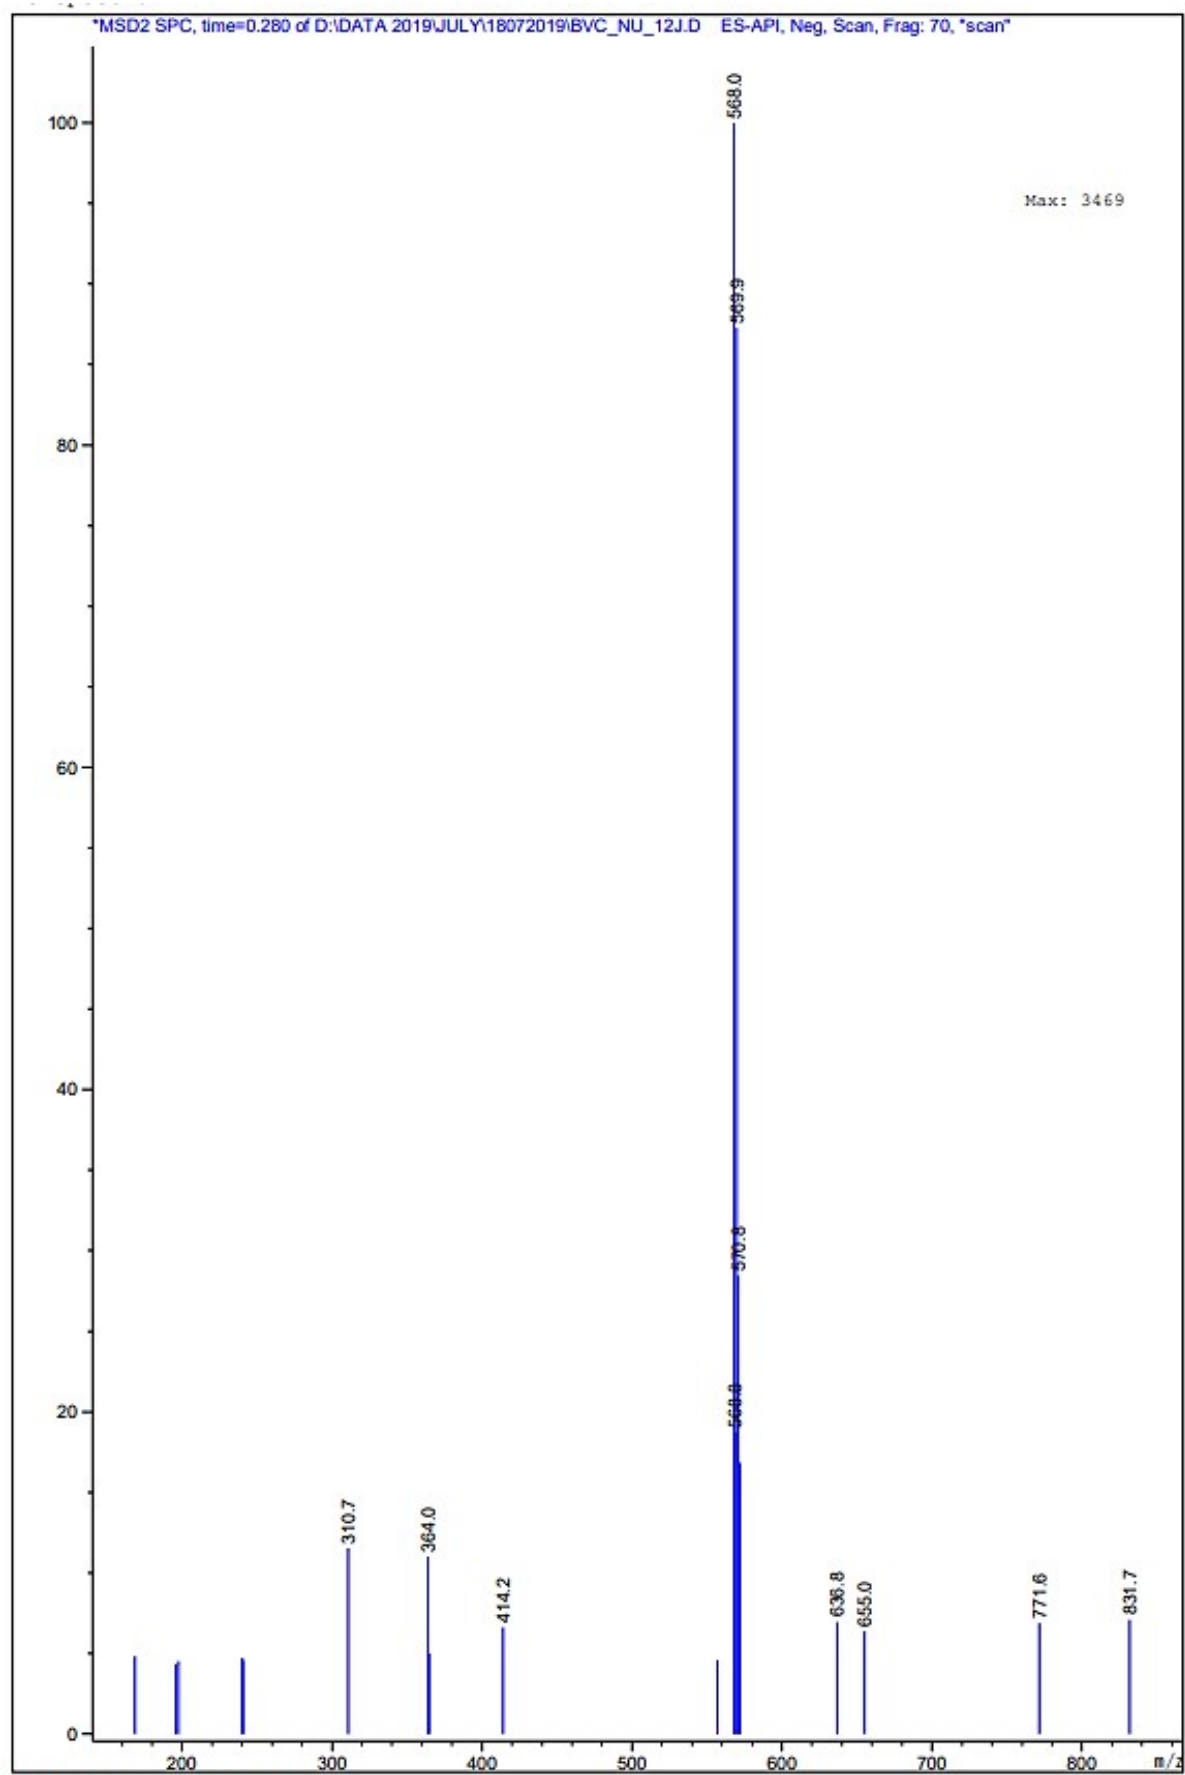

**5-(4-(2-(3-(2,4-difluorophenyl)-5-(furan-2-yl)-4,5-dihydro-1H-pyrazol-1-yl)-2-oxoethoxy)benzylidene)thiazolidine-2,4-dione (15c).**

**a. FTIR**

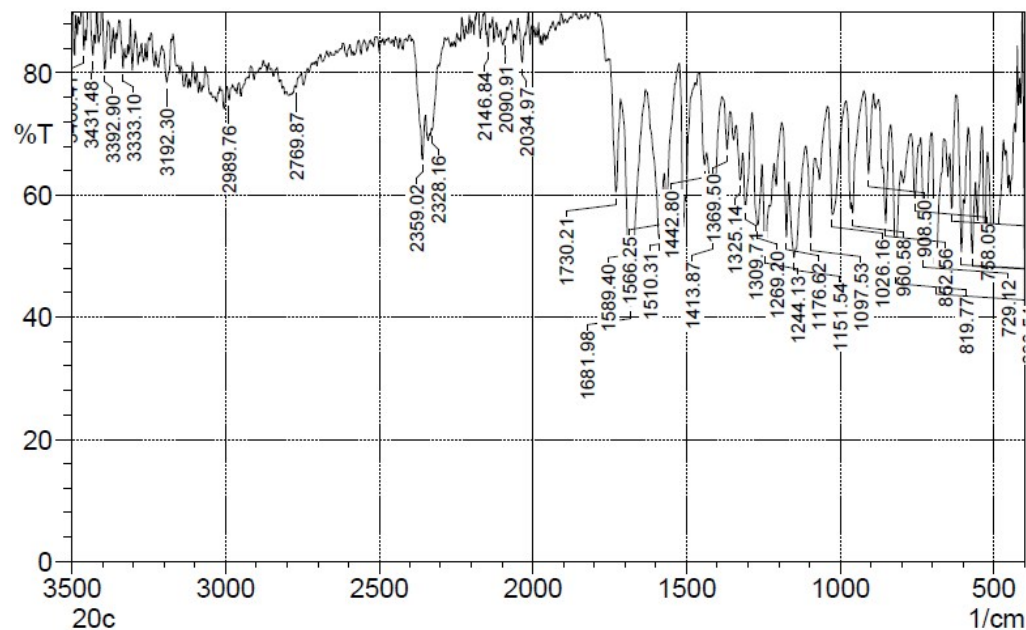

**b. <sup>1</sup>H-NMR**

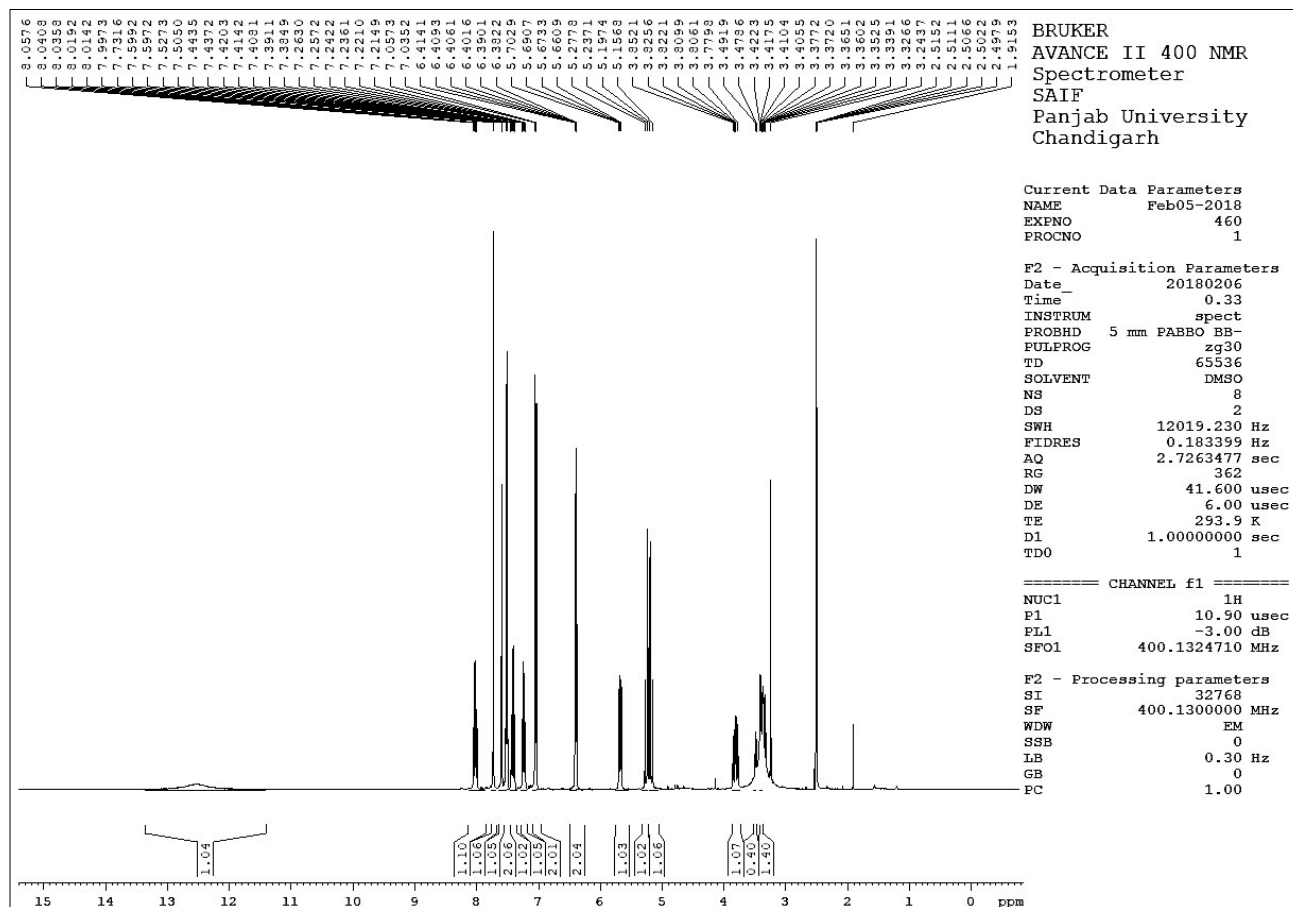

c. <sup>13</sup>C-NMR

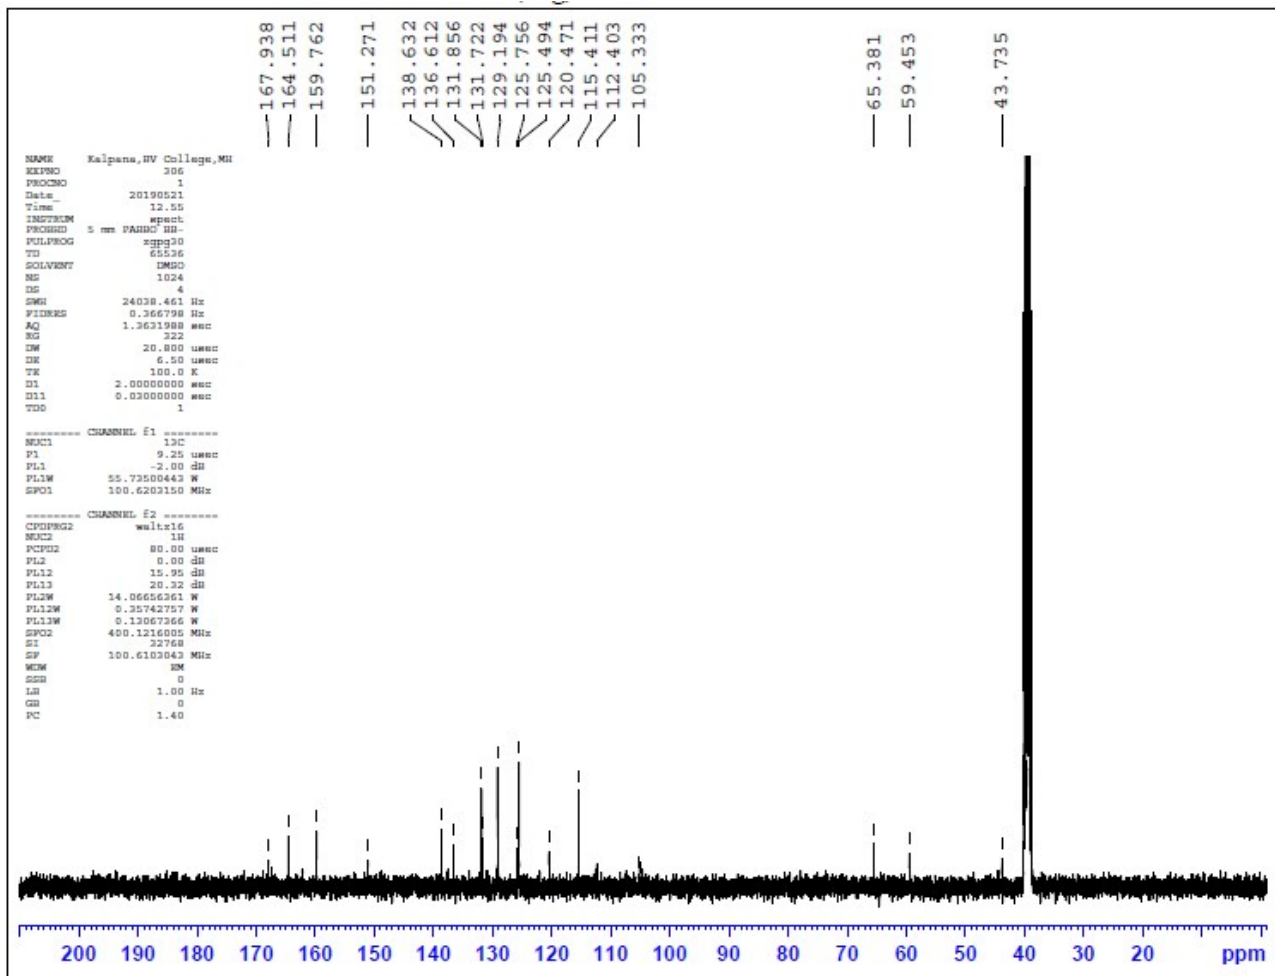

d. HPLC

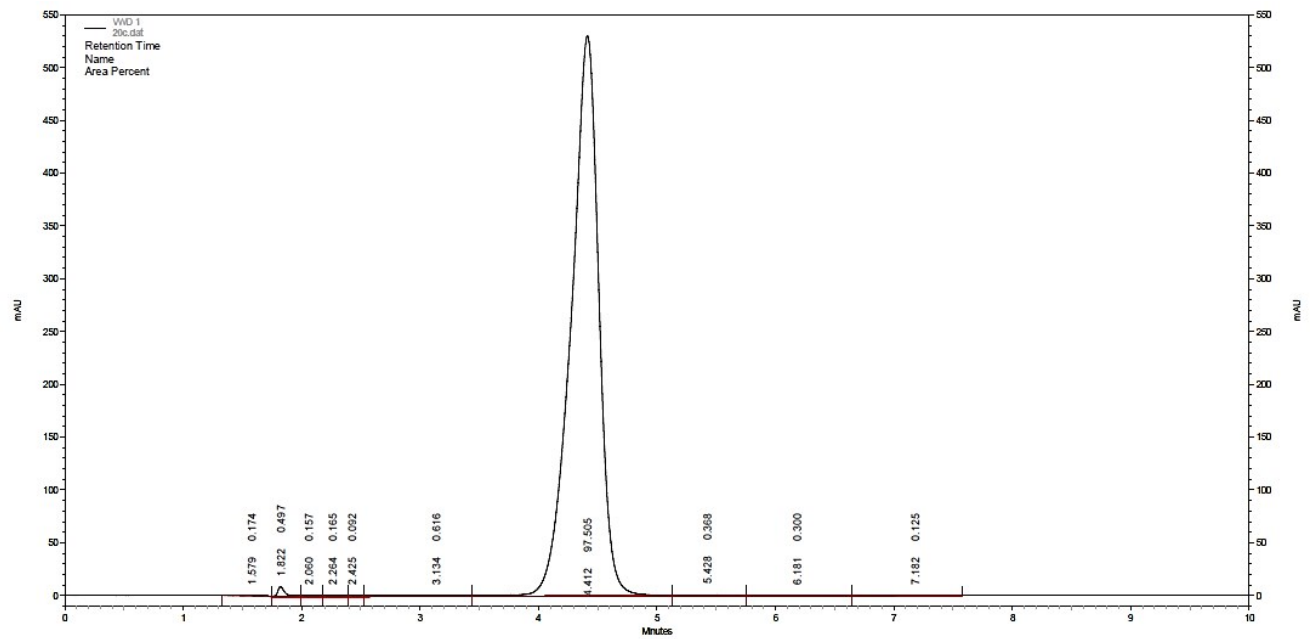

### e. Mass spectroscopy

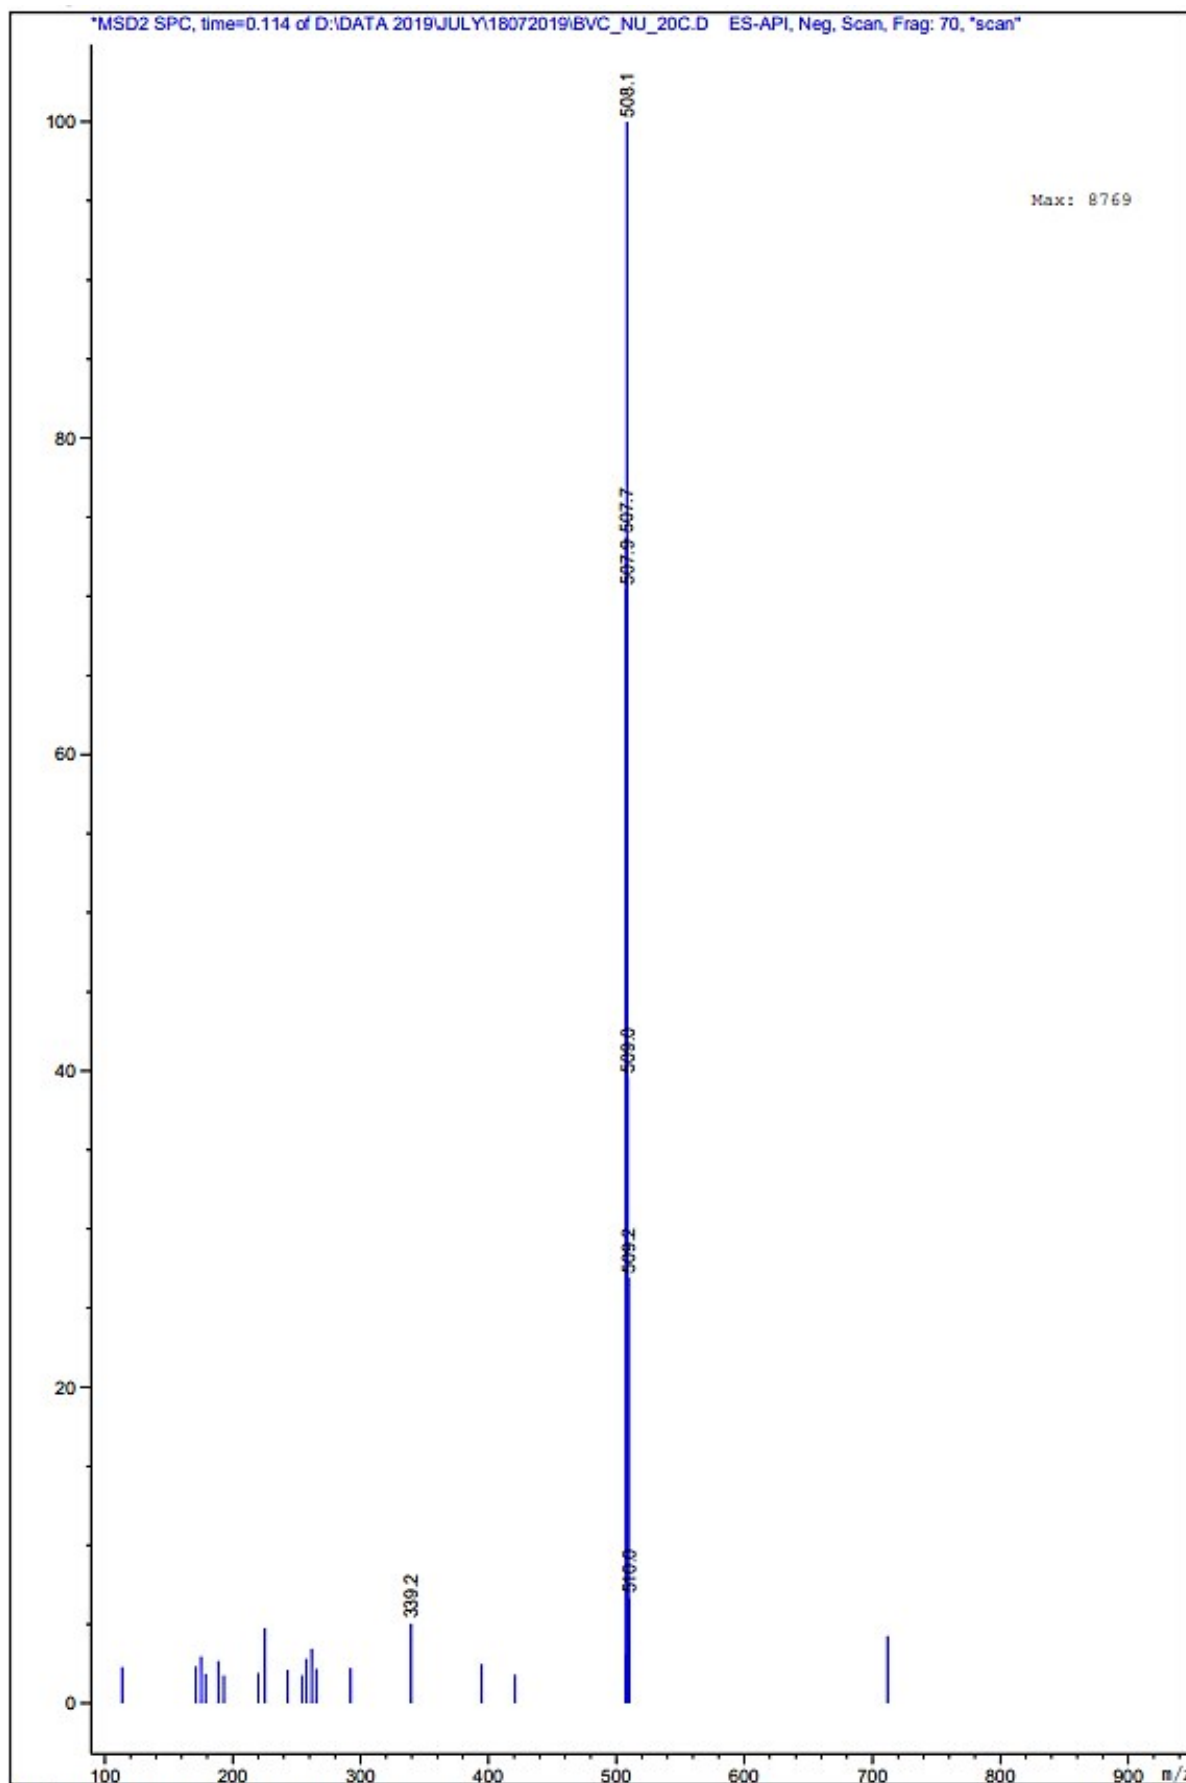

**5-(4-(2-(3-(2,4-difluorophenyl)-5-(4-fluorophenyl)-4,5-dihydro-1H-pyrazol-1-yl)-2-oxoethoxy)benzylidene)thiazolidine-2,4-dione (15e).**

**a. FTIR**

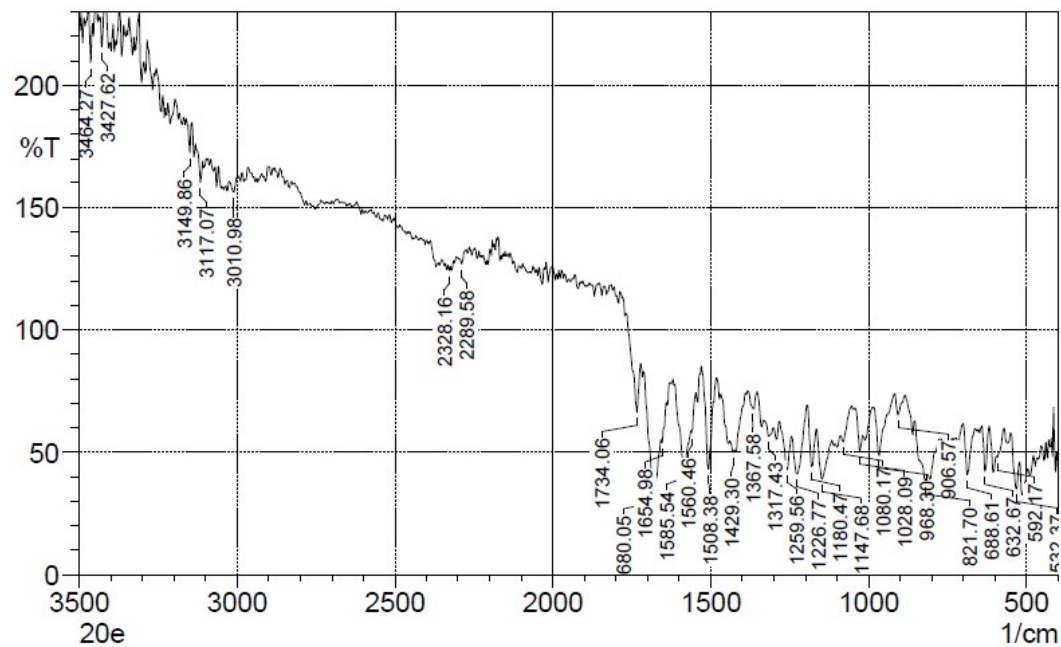

**b. <sup>1</sup>H-NMR**

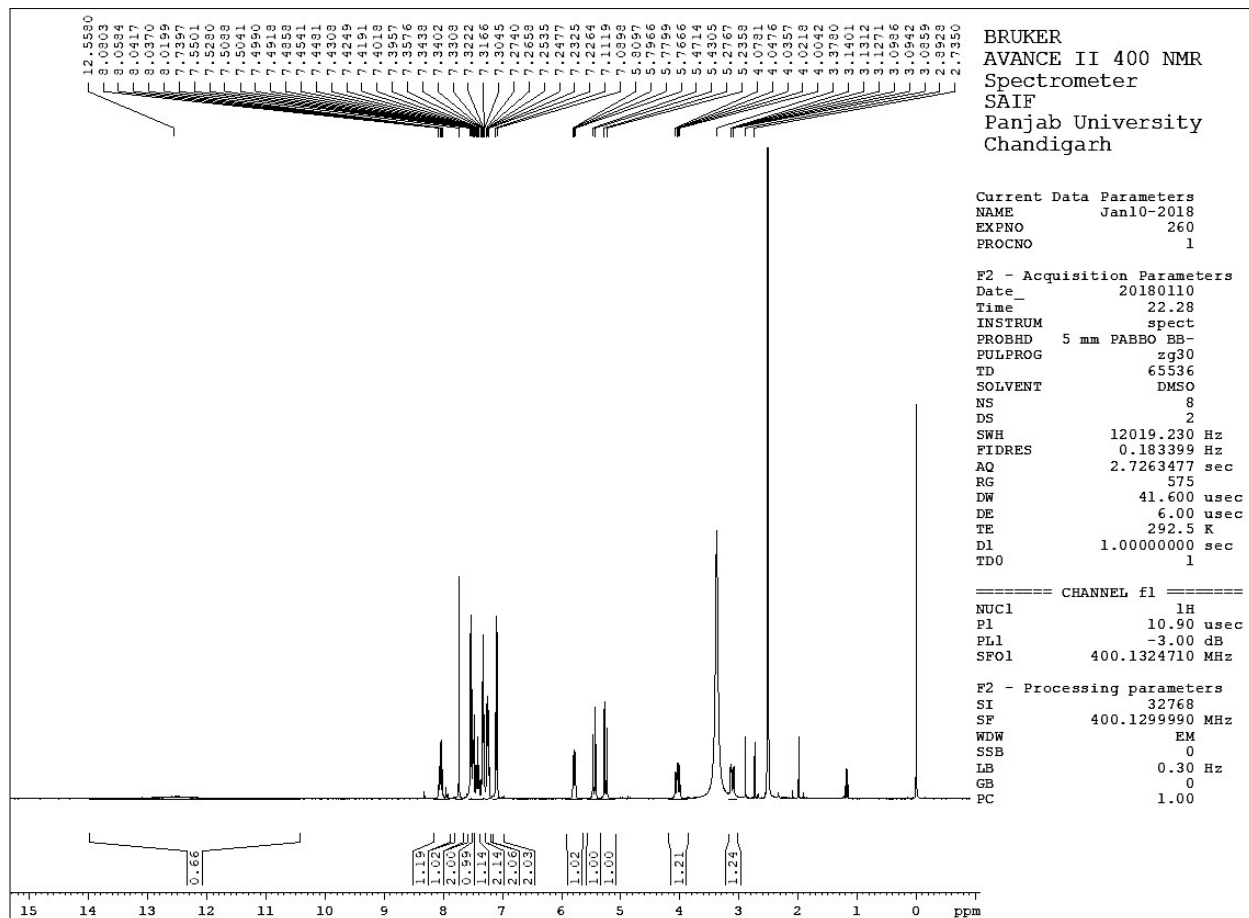



### c. <sup>13</sup>C-NMR

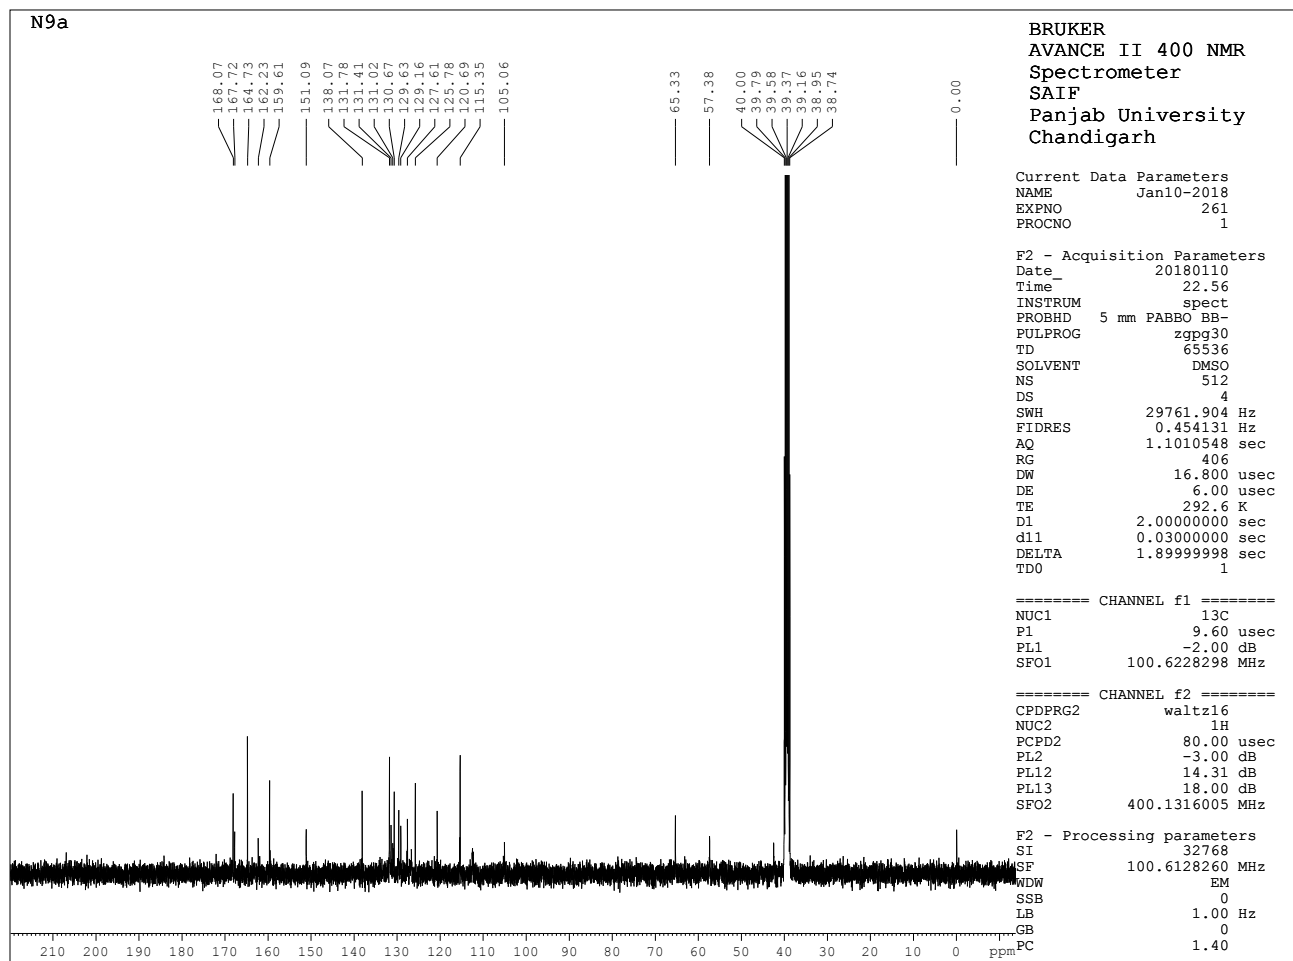

### d. HPLC

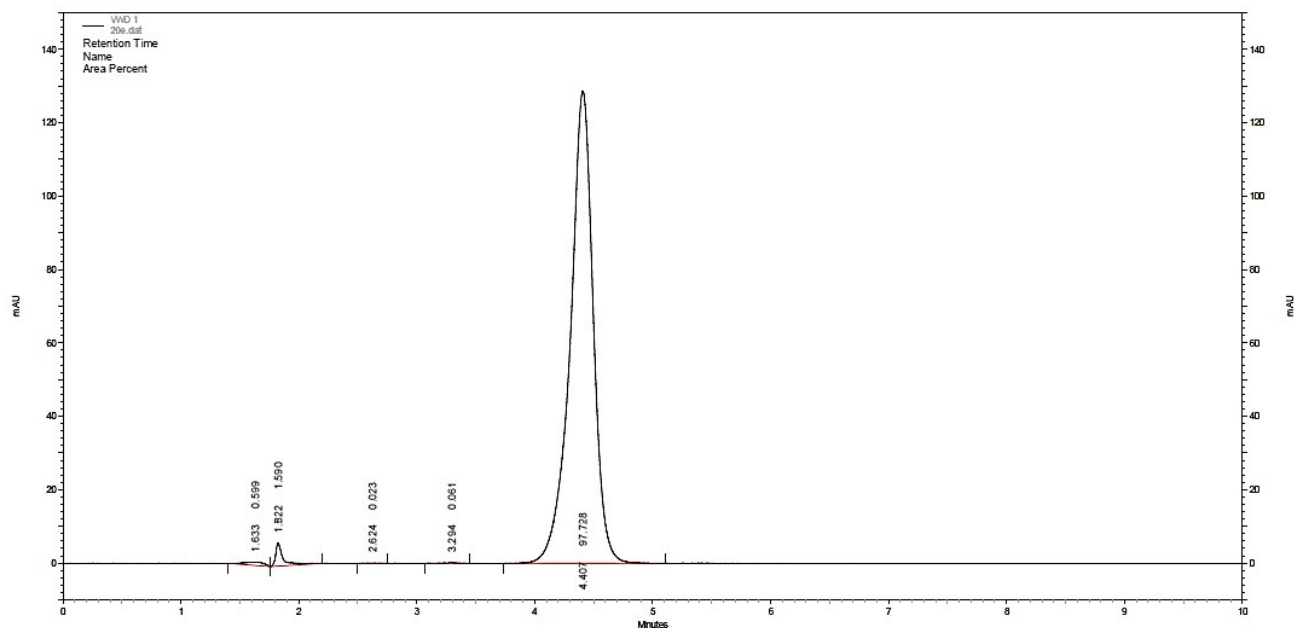

### e. Mass spectroscopy

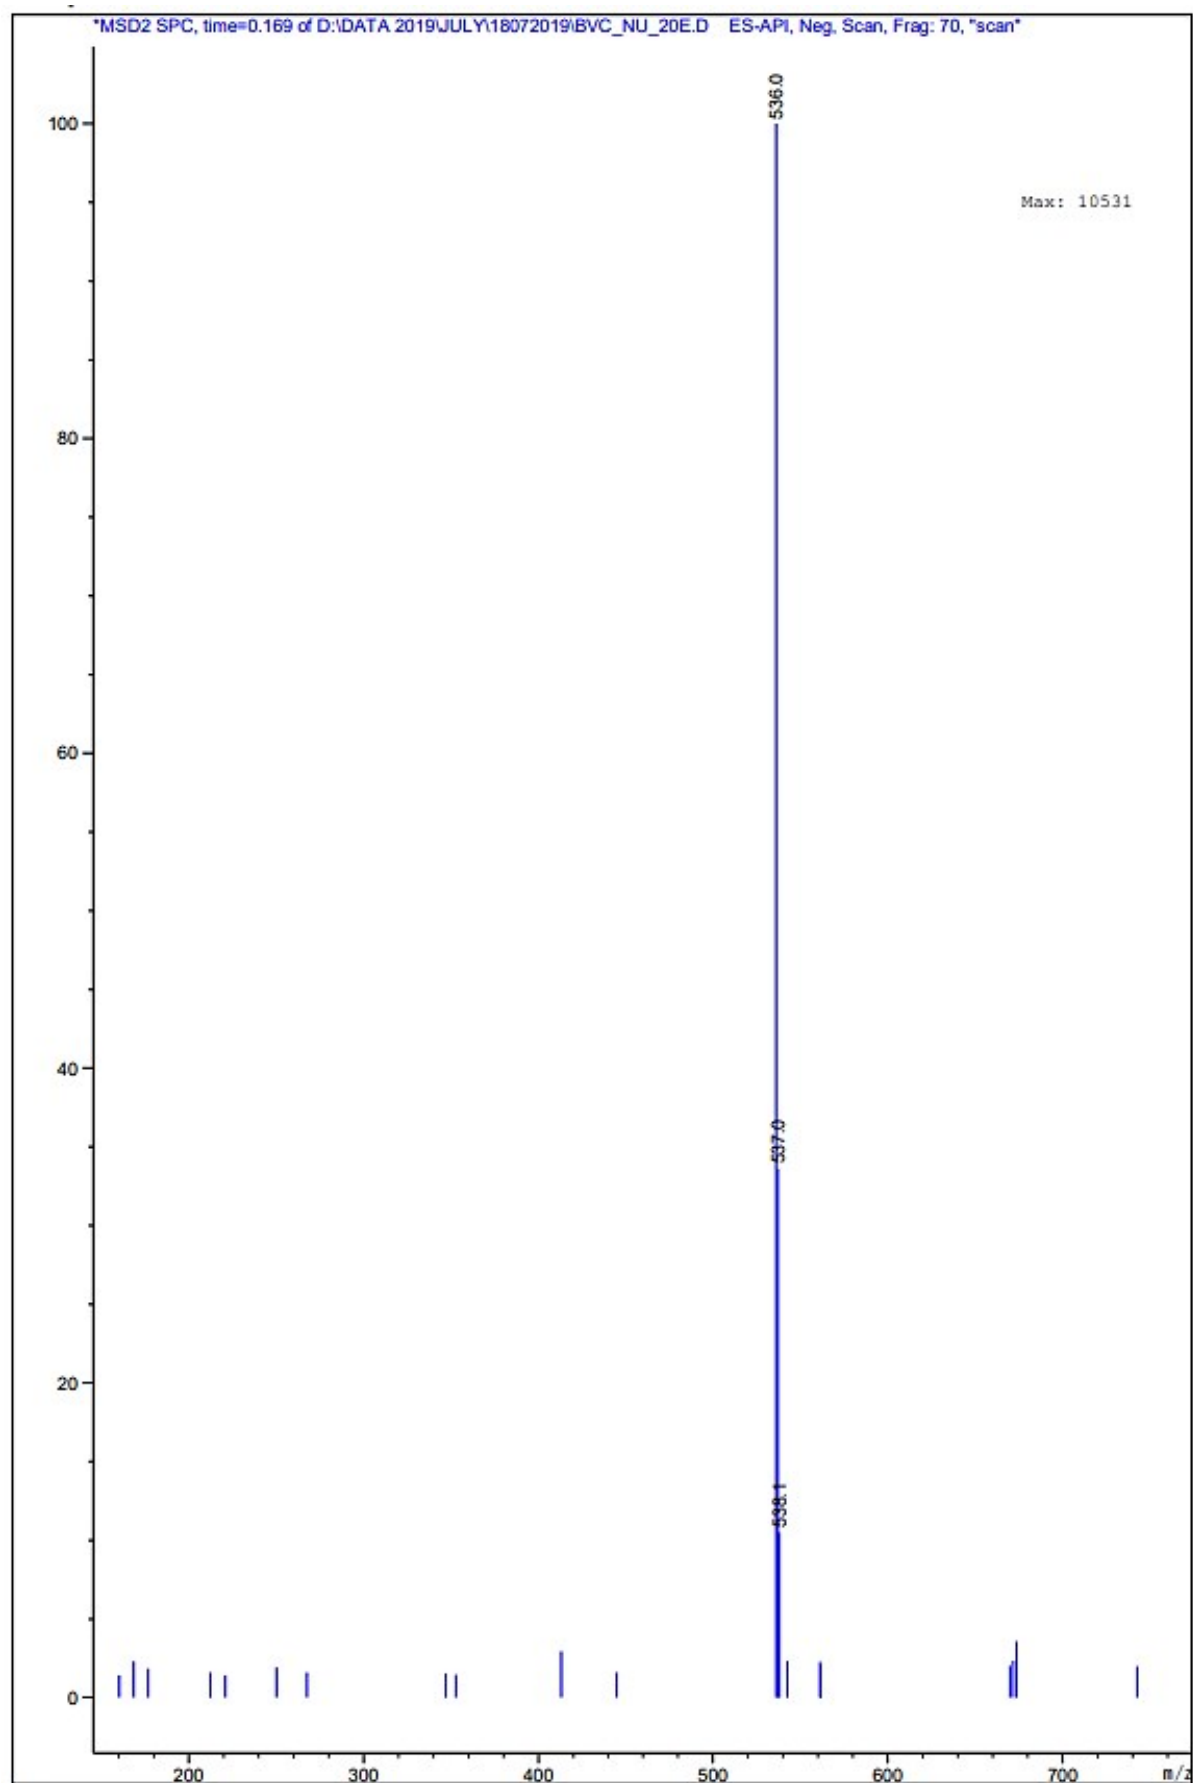

**5-(4-(2-(3-(2,4-difluorophenyl)-5-(p-tolyl)-4,5-dihydro-1H-pyrazol-1-yl)-2-oxoethoxy)benzylidene) thiazolidine-2,4-dione (15g).**

**a. FTIR**

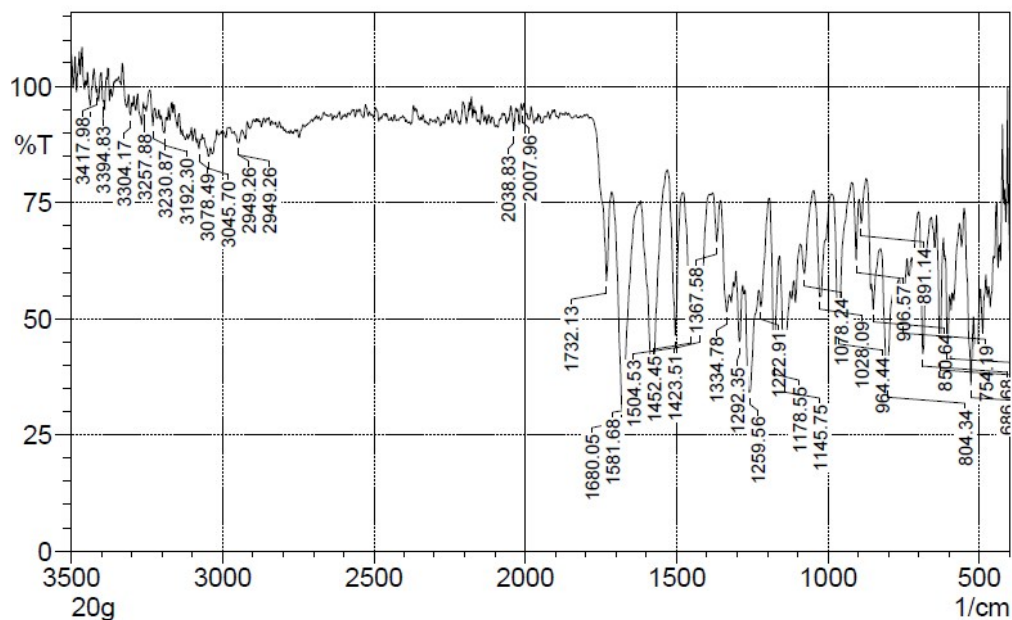

**b. <sup>1</sup>H-NMR**

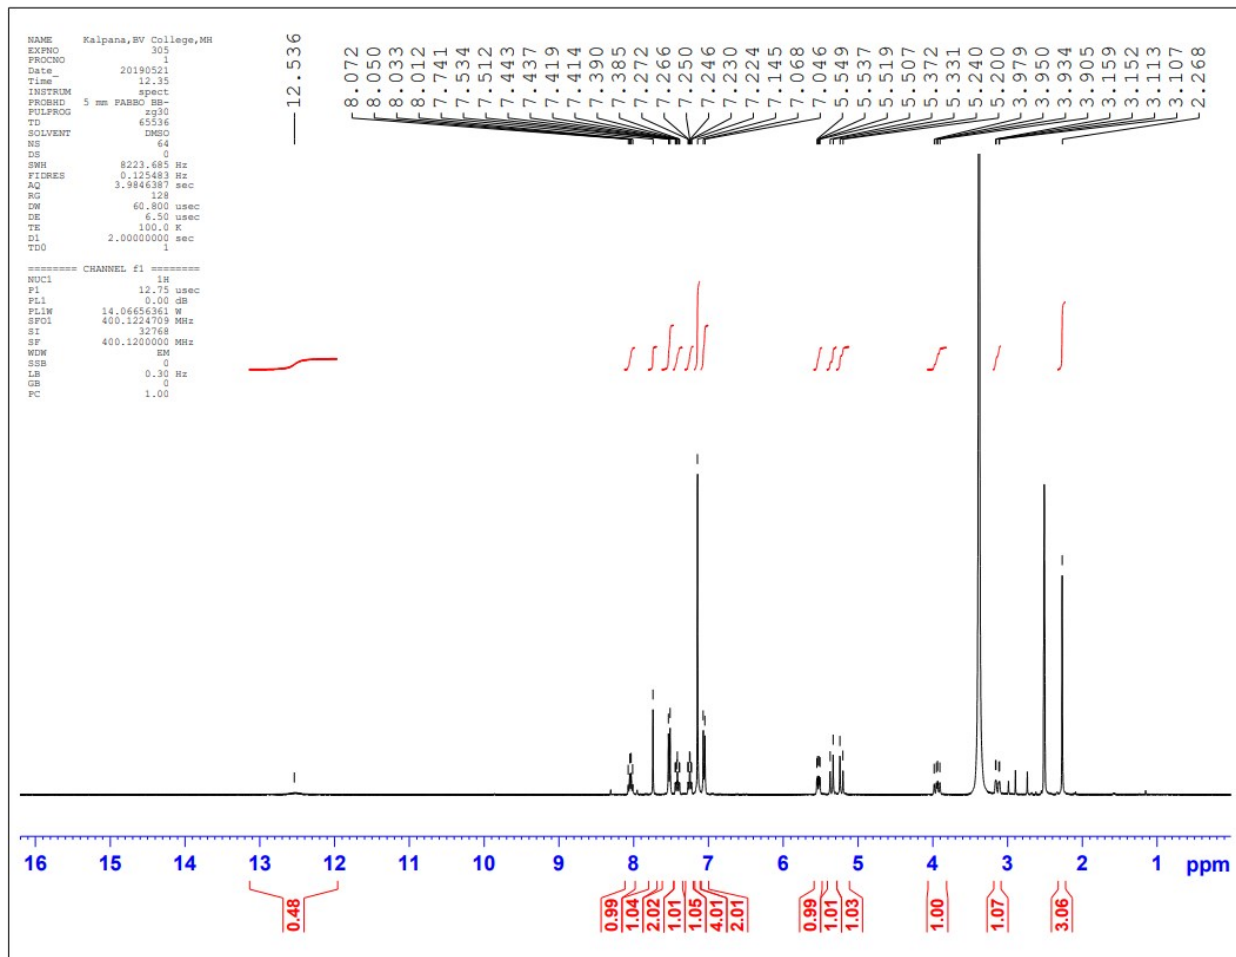

c. <sup>13</sup>C-NMR

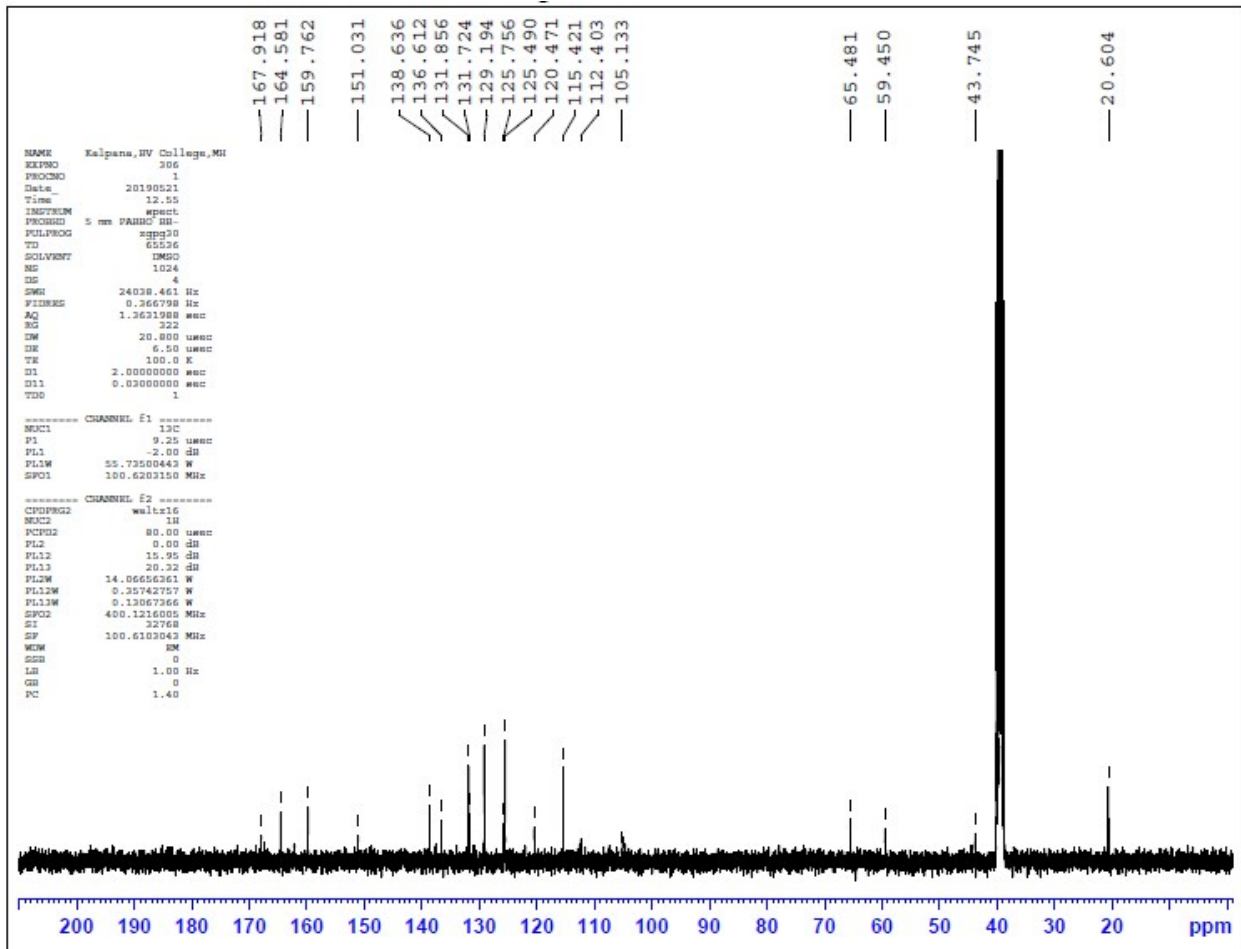

d. HPLC

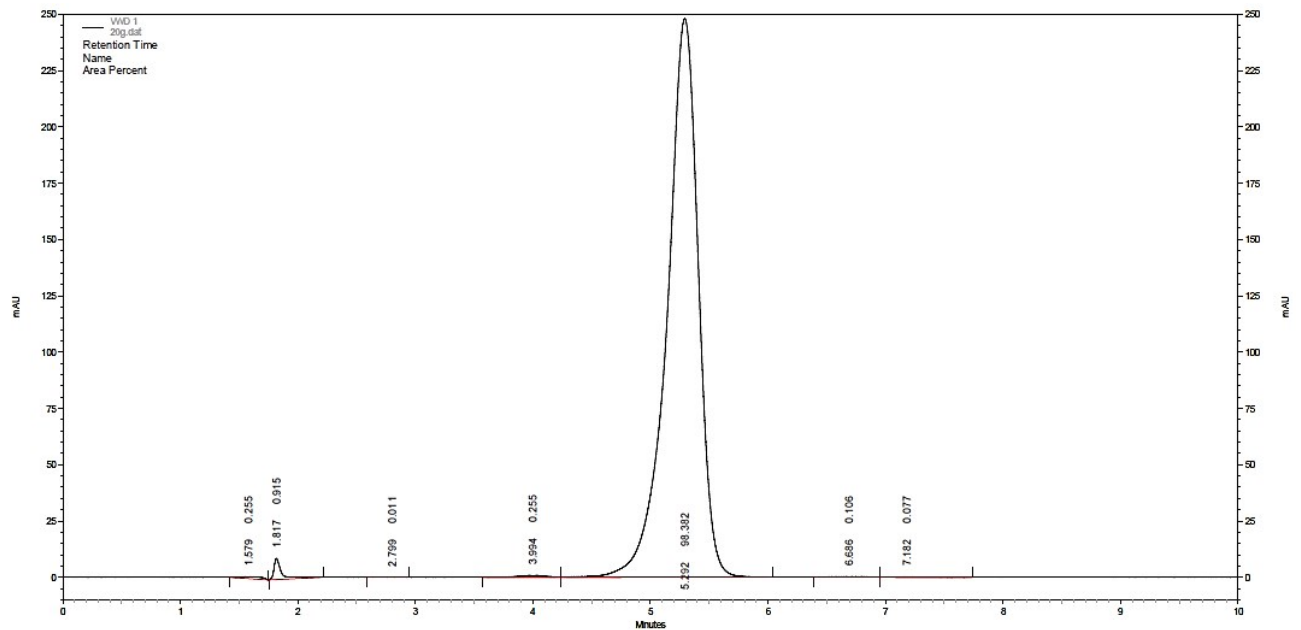

### e. Mass spectroscopy

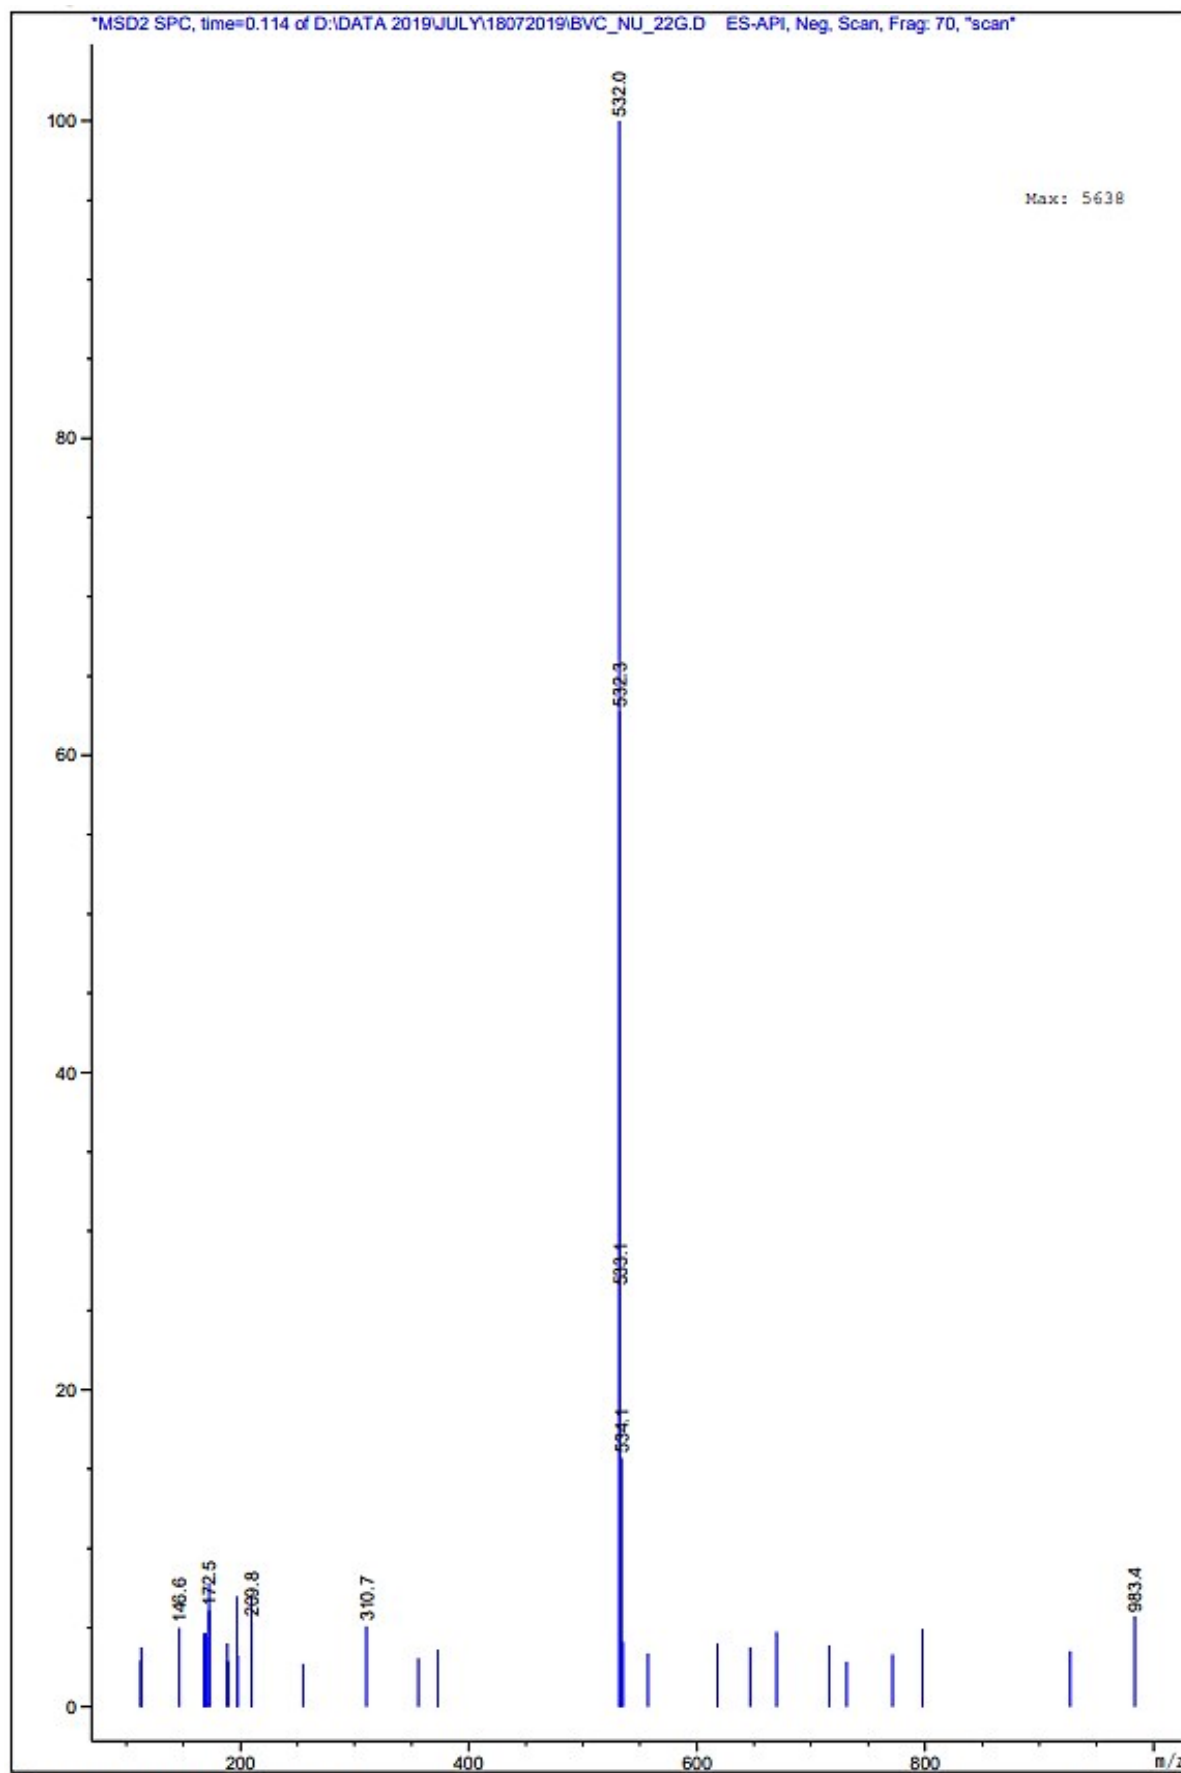

Supplement: d1md00125f1.pdf [file d1md00125f1.pdf]
